# Supplementary material for: Gjd2b-mediated gap junctions promote glutamatergic synapse formation and dendritic elaboration in Purkinje neurons
Source: eLife. 2021 Aug 4;10:e68124. doi: 10.7554/eLife.68124 (PMC8382294; doi:10.7554/eLife.68124)
Supplement: Figure 1—figure supplement 2—source data 1. [file elife-68124-fig1-figsupp2-data1.xlsx]

## Sheet: WtvsSBMOIntensity
treatment	batch	larva	area	mean_i	mode	min	max	percent_area	normalised_mean_wrt_wt
wt	1	2l	2581.4	9.356	11.012	0	5638	3.426	1.1291
wt	1	2r	2581.4	6.119	18.838	0	9645	2.472	0.738452
wt	1	3l	2581.4	7.695	11.92	0	6103	2.855	0.928647
wt	1	3r	2581.4	5.946	14.439	0	7393	2.626	0.717574
wt	1	4l	2581.4	8.471	12.658	0	6481	2.889	1.0223
wt	1	4r	2581.4	4.868	11.031	0	5648	1.921	0.587479
wt	1	5l	2581.4	12.016	12.779	0	6543	4.38	1.45011
wt	1	5r	2581.4	9.36	14.023	0	7180	3.822	1.12958
wt	1	6l	2581.4	10.045	17.115	0	8763	3.945	1.21225
wt	1	6r	2581.4	8.518	11.684	0	5982	3.312	1.02797
wt	1	7l	2581.4	8.327	14.77	0	7562	2.72	1.00492
wt	1	7r	2581.4	8.714	17.787	0	9107	3.456	1.05162
sbmo	2	A1l	2581.4	2.436	20.219	0	10352	0.795	1.46394
sbmo	2	A1r	2581.4	2.555	12.309	0	6302	0.872	1.53546
sbmo	2	A2l	2581.4	1.505	9.271	0	4747	0.624	0.904447
sbmo	2	A2r	2581.4	0.707	4.377	0	2241	0.385	0.42488
sbmo	2	A3l	2581.4	1.179	5.174	0	2649	0.653	0.708534
sbmo	2	A3r	2581.4	1.145	4.973	0	2546	0.629	0.688101
sbmo	2	A4l	2581.4	0.994	12.512	0	6406	0.436	0.597356
sbmo	2	A4r	2581.4	1.206	4.994	0	2557	0.567	0.72476
wt	2	B1l	2581.4	0.845	6.799	0	3481	0.367	0.507812
wt	2	B1r	2581.4	0.895	5.033	0	2577	0.463	0.537861
wt	2	B2l	2581.4	1.292	6.312	0	3232	0.731	0.776442
wt	2	B2r	2581.4	2.175	8.412	0	4307	0.954	1.30709
wt	2	B4l	2581.4	1.497	8.498	0	4351	0.669	0.899639
wt	2	B4r	2581.4	1.196	8.365	0	4283	0.631	0.71875
wt	2	B5l	2581.4	2.915	10.109	0	5176	1.217	1.7518
wt	2	B5r	2581.4	2.075	7.102	0	3636	0.995	1.247
wt	2	B6l	2581.4	0.888	4.838	0	2477	0.536	0.533654
wt	2	B6r	2581.4	1.535	17.201	0	8807	0.689	0.922476
wt	2	B8l	2581.4	0.654	4.398	0	2252	0.463	0.393029
wt	2	B8r	2581.4	1.985	10.42	0	5335	0.998	1.19291
sbmo	2	C1l	2581.4	0.53	3.338	0	1709	0.316	0.31851
sbmo	2	C1r	2581.4	0.605	7.873	0	4031	0.368	0.363582
sbmo	2	C2l	2581.4	1.815	12.219	0	6256	0.714	1.09075
sbmo	2	C2r	2581.4	0.908	6.463	0	3309	0.516	0.545673
sbmo	2	C3l	2581.4	0.767	4.428	0	2267	0.415	0.460938
sbmo	2	C3r	2581.4	0.845	5.004	0	2562	0.412	0.507812
sbmo	2	C4l	2581.4	0.641	4.266	0	2184	0.322	0.385216
sbmo	2	C4r	2581.4	1.19	9.98	0	5110	0.523	0.715144
sbmo	2	C5l	2581.4	0.531	3.973	0	2034	0.349	0.319111
sbmo	2	C5r	2581.4	1.038	9.926	0	5082	0.501	0.623798
sbmo	2	C6l	2581.4	0.48	5.023	0	2572	0.291	0.288462
sbmo	2	C6r	2581.4	0.455	4.135	0	2117	0.291	0.273438
sbmo	2	C8l	2581.4	0.738	4.525	0	2317	0.454	0.44351
sbmo	2	C8r	2581.4	0.707	4.488	0	2298	0.435	0.42488
sbmo	2	D1l	2581.4	0.746	7.764	0	3975	0.323	0.448317
sbmo	2	D1r	2581.4	0.958	6.008	0	3076	0.427	0.575721
sbmo	2	D2l	2581.4	0.327	2.561	0	1311	0.236	0.196514
sbmo	2	D2r	2581.4	2.337	7.26	0	3717	1.001	1.40445
sbmo	2	D3l	2581.4	0.935	7.166	0	3669	0.526	0.561899
sbmo	2	D3r	2581.4	1.024	3.957	0	2026	0.593	0.615385
sbmo	2	D5l	2581.4	0.104	2.627	0	1345	0.066	0.0625
sbmo	2	D5r	2581.4	0.013	0.736	0	377	0.013	0.0078125
sbmo	2	D6l	2581.4	0.804	6.504	0	3330	0.436	0.483173
sbmo	2	D6r	2581.4	0.561	3.385	0	1733	0.313	0.337139
sbmo	2	D7l	2581.4	0.68	4.162	0	2131	0.34	0.408654
sbmo	2	D7r	2581.4	1.356	9.807	0	5021	0.582	0.814904
sbmo	2	D8l	2581.4	0.925	4.057	0	2077	0.495	0.555889
sbmo	2	D8r	2581.4	0.839	7.4	0	3789	0.451	0.504207
wt	2	E3l	2581.4	2.802	12.715	0	6510	1.046	1.68389
wt	2	E3r	2581.4	3.175	13.748	0	7039	1.059	1.90805
wt	2	E5l	2581.4	0.665	4.998	0	2559	0.342	0.399639
wt	2	E5r	2581.4	0.478	4.553	0	2331	0.249	0.28726
wt	2	E6l	2581.4	2.341	11.15	0	5709	0.756	1.40685
wt	2	E6r	2581.4	2.161	12.303	0	6299	0.605	1.29868
wt	2	E7l	2581.4	0.906	6.002	0	3073	0.44	0.544471
wt	2	E7r	2581.4	0.96	10.246	0	5246	0.436	0.576923
wt	2	E8l	2581.4	1.166	8.783	0	4497	0.53	0.700721
wt	2	E8r	2581.4	1.985	7.131	0	3651	0.86	1.19291
wt	2	F1l	2581.4	1.378	5.252	0	2689	0.688	0.828125
wt	2	F1r	2581.4	1.58	5.809	0	2974	0.725	0.949519
wt	2	F2l	2581.4	1.122	4.998	0	2559	0.657	0.674279
wt	2	F2r	2581.4	1.366	7.414	0	3796	0.568	0.820913
wt	2	F3l	2581.4	3.341	11.809	0	6046	1.366	2.00781
wt	2	F3r	2581.4	2.734	9.672	0	4952	1.176	1.64303
wt	2	F4l	2581.4	1.595	9.822	0	5029	0.683	0.958534
wt	2	F4r	2581.4	2.213	9.695	0	4964	0.787	1.32993
sbmo	1	1l	2581.4	3.054	12.785	0	6546	1.411	0.368562
sbmo	1	1r	2581.4	2.738	9.646	0	4939	1.294	0.330427
sbmo	1	2l	2581.4	5.442	12.004	0	6146	2.243	0.656751
sbmo	1	2r	2581.4	2.064	7.799	0	3993	1.171	0.249087
sbmo	1	3l	2581.4	1.843	4.643	0	2377	1.051	0.222417
sbmo	1	3r	2581.4	1.695	4.498	0	2303	1.1	0.204556
sbmo	1	4l	2581.4	4.951	9.541	0	4885	2.193	0.597496
sbmo	1	4r	2581.4	4.734	9.02	0	4618	2.504	0.571308
sbmo	1	5l	2581.4	5.58	19.318	0	9891	2.1	0.673405
sbmo	1	5r	2581.4	4.171	16.014	0	8199	1.728	0.503364
sbmo	1	6l	2581.4	4.087	9.107	0	4663	1.846	0.493227
sbmo	1	6r	2581.4	6.387	25.305	0	12956	2.448	0.770795
Batch 1 avg wt intensity				8.28625
Batch 2 avg wt intensity				1.664
WT avg intensity				3.55607
WT median intensity				2.118
sbmo avg intensity				1.69442				0.476486
sbmo median intensity				1.009				0.476393
Figure S2C Statistics: Raw intensity: Uninjected vs SBMO mean intensity: Uninjected: 3.56 ± 0.5 AU, n = 42; SBMO: 1.69 ± 0.22 AU, n = 48; P < 0.001, Mann-Whitney U test. Uninjected vs control morpholino injected: Uninjected: 0.57 ± 0.07 AU, n = 30; Scra: 0.81 ±0.09 AU, n = 44; P = 0.1232, Mann-Whitney U test.
Normalized intensity: Uninjected vs SBMO mean intensity: P<0.001, n:- uninjected:42; SBMO: 48; Uninjected vs control morpholino injected:P = 0.14; n:- unijected:30; scra:44. , Mann-Whitney U test.

## Sheet: WTvsCtrlIntensity
treatment	batch	larva	area	mean_i	mode	min	max	percent_area	normalised_mean_wrt_wt
wt	2	B1l	2581.4	1.172	7.576	0	3879	0.613	2.10065
wt	2	B1r	2581.4	0.453	3.453	0	1768	0.348	0.81194
wt	2	B2l	2581.4	0.573	5.496	0	2814	0.342	1.02702
wt	2	B2r	2581.4	0.763	13.441	0	6882	0.336	1.36757
wt	2	B3l	2581.4	0.738	8.205	0	4201	0.261	1.32276
wt	2	B3r	2581.4	2.03	13.84	0	7086	0.677	3.63849
wt	2	B6l	2581.4	0.928	9.094	0	4656	0.473	1.66331
wt	2	B6r	2581.4	0.704	9.422	0	4824	0.294	1.26182
scr	2	C1l	2581.4	0.201	2.643	0	1353	0.152	0.360265
scr	2	C1r	2581.4	0.331	6.625	0	3392	0.196	0.593272
scr	2	C3l	2581.4	0.798	10.539	0	5396	0.284	1.4303
scr	2	C3r	2581.4	0.812	5.643	0	2889	0.343	1.4554
scr	2	C4l	2581.4	0.811	6.432	0	3293	0.551	1.45361
scr	2	C4r	2581.4	0.628	3.551	0	1818	0.421	1.1256
scr	2	C5l	2581.4	1.115	14.742	0	7548	0.481	1.99848
scr	2	C5r	2581.4	0.288	4.762	0	2438	0.201	0.5162
wt	2	D2l	2581.4	0.169	2.271	0	1163	0.129	0.302909
wt	2	D2r	2581.4	0.202	2.977	0	1524	0.143	0.362057
wt	2	D3l	2581.4	0.159	3.072	0	1573	0.097	0.284986
wt	2	D3r	2581.4	0.32	4.688	0	2400	0.176	0.573556
wt	2	D5l	2581.4	0.312	3.693	0	1891	0.186	0.559217
wt	2	D5r	2581.4	0.609	4.779	0	2447	0.321	1.09155
wt	2	E1l	2581.4	0.034	1.27	0	650	0.044	0.0609403
wt	2	E1r	2581.4	0.014	0.951	0	487	0.014	0.0250931
wt	2	E2l	2581.4	0.201	2.822	0	1445	0.145	0.360265
wt	2	E2r	2581.4	0.5	4.619	0	2365	0.267	0.896181
wt	2	E5l	2581.4	0.192	2.922	0	1496	0.118	0.344134
wt	2	E5r	2581.4	0.596	2.777	0	1422	0.465	1.06825
wt	2	E6l	2581.4	0.944	9.852	0	5044	0.479	1.69199
wt	2	E6r	2581.4	0.963	4.924	0	2521	0.56	1.72604
wt	2	E7l	2581.4	0.825	13.535	0	6930	0.36	1.4787
wt	2	E7r	2581.4	0.439	3.248	0	1663	0.343	0.786847
wt	2	E8l	2581.4	0.142	2.229	0	1141	0.134	0.254515
wt	2	E8r	2581.4	0.524	4.852	0	2484	0.35	0.939198
scr	2	F2l	2581.4	0.374	3.811	0	1951	0.233	0.670343
scr	2	F2r	2581.4	0.605	7.045	0	3607	0.39	1.08438
scr	2	F3l	2581.4	0.351	4.623	0	2367	0.216	0.629119
scr	2	F3r	2581.4	0.498	4.184	0	2142	0.309	0.892596
scr	2	F4l	2581.4	0.459	3.709	0	1899	0.286	0.822694
scr	2	F4r	2581.4	0.229	2.283	0	1169	0.183	0.410451
wt	1	1l	2581.4	0.604	2.693	0	1379	0.635	0.907247
wt	1	1r	2581.4	0.632	3.01	0	1541	0.672	0.949305
wt	1	2l	2581.4	0.555	3.939	0	2017	0.484	0.833646
wt	1	2r	2581.4	0.872	3.334	0	1707	0.85	1.3098
scr	1	1l	2581.4	2.393	12.916	0	6613	1.292	3.59444
scr	1	1r	2581.4	0.546	4.393	0	2249	0.381	0.820128
scr	1	2l	2581.4	0.559	3.262	0	1670	0.552	0.839655
scr	1	2r	2581.4	0.726	3.805	0	1948	0.567	1.0905
scr	1	3l	2581.4	1.561	7.232	0	3703	1.128	2.34472
scr	1	3r	2581.4	0.542	2.441	0	1250	0.615	0.814119
scr	1	5l	2581.4	2.153	4.096	0	2097	1.654	3.23395
scr	1	5r	2581.4	1.76	3.686	0	1887	1.516	2.64363
scr	1	6l	2581.4	0.11	1.678	0	859	0.113	0.165227
scr	1	6r	2581.4	0.129	2.061	0	1055	0.148	0.193766
scr	1	7l	2581.4	1.043	3.217	0	1647	0.718	1.56665
scr	1	7r	2581.4	0.621	3.047	0	1560	0.499	0.932783
scr	1	8l	2581.4	1.35	5.057	0	2589	0.943	2.02779
scr	1	8r	2581.4	1.269	3.148	0	1612	0.926	1.90612
scr	2	A1l	2581.4	0.555	4.258	0	2180	0.388	0.994761
scr	2	A1l	2581.4	0.146	2.658	0	1361	0.104	0.261685
scr	2	A1l	2581.4	2.053	10.633	0	5444	0.867	3.67972
scr	2	A1l	2581.4	0.573	4.93	0	2524	0.404	1.02702
scr	2	A1l	2581.4	1.568	6.305	0	3228	0.882	2.81042
scr	2	A1l	2581.4	0.882	6.318	0	3235	0.565	1.58086
scr	2	A4l	2581.4	0.733	7.721	0	3953	0.488	1.3138
scr	2	A4r	2581.4	0.94	5.029	0	2575	0.559	1.68482
scr	2	A5l	2581.4	0.157	1.322	0	677	0.192	0.281401
scr	2	A5r	2581.4	0.182	3.227	0	1652	0.168	0.32621
scr	2	A6l	2581.4	0.449	3.172	0	1624	0.338	0.804771
scr	2	A6r	2581.4	0.234	3.201	0	1639	0.214	0.419413
scr	2	A7l	2581.4	0.719	6.666	0	3413	0.474	1.28871
scr	2	A7r	2581.4	1.425	7.488	0	3834	0.706	2.55412
scr	2	A8l	2581.4	1.364	10.986	0	5625	0.774	2.44478
scr	2	A8r	2581.4	1.307	5.867	0	3004	0.822	2.34262
Batch 1 avg wt intensity				0.66575
Batch 2 avg wt intensity				0.557923
WT avg intensity				0.5723
WT median intensity				0.564
Scr avg intensity				0.807932		1.41173
Scr median intensity				0.6245		1.10727
