# Supplementary material for: Gjd2b-mediated gap junctions promote glutamatergic synapse formation and dendritic elaboration in Purkinje neurons
Source: eLife. 2021 Aug 4;10:e68124. doi: 10.7554/eLife.68124 (PMC8382294; doi:10.7554/eLife.68124)
Supplement: Figure 1—source data 1. [file elife-68124-fig1-data1.xlsx]

## Sheet: iei
Group	IEI (ms)	cf		Group	IEI(ms)	cf
WT	59.344	0.00409836		SBMO	25.5622	0.00561798
WT	98.9688	0.00819672		SBMO	26.797	0.011236
WT	141.594	0.0122951		SBMO	43.4378	0.0168539
WT	151.063	0.0163934		SBMO	44.906	0.0224719
WT	173.906	0.0204918		SBMO	46.9685	0.0280899
WT	195.25	0.0245902		SBMO	53	0.0337079
WT	221.406	0.0286885		SBMO	64.6563	0.0393258
WT	241.093	0.0327869		SBMO	70.5622	0.0449438
WT	256.25	0.0368852		SBMO	100.156	0.0505618
WT	258.05	0.0409836		SBMO	123.563	0.0561798
WT	264.094	0.045082		SBMO	141.949	0.0617978
WT	267.406	0.0491803		SBMO	148.312	0.0674157
WT	335.343	0.0532787		SBMO	184.844	0.0730337
WT	366	0.057377		SBMO	275.312	0.0786517
WT	381.7	0.0614754		SBMO	288.281	0.0842697
WT	424.898	0.0655738		SBMO	320.051	0.0898876
WT	429.656	0.0696721		SBMO	322.594	0.0955056
WT	433.25	0.0737705		SBMO	456.25	0.101124
WT	434.844	0.0778689		SBMO	491.641	0.106742
WT	435.437	0.0819672		SBMO	615.5	0.11236
WT	448.5	0.0860656		SBMO	658	0.117978
WT	471.344	0.0901639		SBMO	702.437	0.123596
WT	487.25	0.0942623		SBMO	766.203	0.129213
WT	487.937	0.0983607		SBMO	959.438	0.134831
WT	514.469	0.102459		SBMO	1024.06	0.140449
WT	518.187	0.106557		SBMO	1031.91	0.146067
WT	544.891	0.110656		SBMO	1048.84	0.151685
WT	556.906	0.114754		SBMO	1100.34	0.157303
WT	617.594	0.118852		SBMO	1253.95	0.162921
WT	622.55	0.122951		SBMO	1323.2	0.168539
WT	646.094	0.127049		SBMO	1570	0.174157
WT	666.9	0.131148		SBMO	1696.8	0.179775
WT	697.047	0.135246		SBMO	1926.91	0.185393
WT	701.312	0.139344		SBMO	2199.62	0.191011
WT	738	0.143443		SBMO	2434.66	0.196629
WT	746.649	0.147541		SBMO	2620.85	0.202247
WT	772.5	0.151639		SBMO	2695.5	0.207865
WT	785.851	0.155738		SBMO	2867.15	0.213483
WT	786.156	0.159836		SBMO	3034.1	0.219101
WT	796.438	0.163934		SBMO	3037.3	0.224719
WT	798.398	0.168033		SBMO	3039.8	0.230337
WT	890.75	0.172131		SBMO	3145.12	0.235955
WT	900.75	0.17623		SBMO	3228.2	0.241573
WT	900.797	0.180328		SBMO	3486.05	0.247191
WT	928.125	0.184426		SBMO	3772.19	0.252809
WT	944.594	0.188525		SBMO	3820.2	0.258427
WT	973.25	0.192623		SBMO	4059.19	0.264045
WT	980.281	0.196721		SBMO	4059.69	0.269663
WT	982.156	0.20082		SBMO	4131.86	0.275281
WT	1007.97	0.204918		SBMO	4137.22	0.280899
WT	1175.38	0.209016		SBMO	4233.3	0.286517
WT	1233.66	0.213115		SBMO	4383.28	0.292135
WT	1251.5	0.217213		SBMO	4736.16	0.297753
WT	1255.89	0.221311		SBMO	4741.5	0.303371
WT	1351.05	0.22541		SBMO	4782.34	0.308989
WT	1386.41	0.229508		SBMO	5119.84	0.314607
WT	1388.19	0.233607		SBMO	5491.15	0.320225
WT	1431	0.237705		SBMO	5773.59	0.325843
WT	1441.9	0.241803		SBMO	6321.95	0.331461
WT	1460.75	0.245902		SBMO	6345.55	0.337079
WT	1468.95	0.25		SBMO	6776.59	0.342697
WT	1481.1	0.254098		SBMO	7339.8	0.348315
WT	1504.8	0.258197		SBMO	7556.55	0.353933
WT	1505.12	0.262295		SBMO	7717.7	0.359551
WT	1526.5	0.266393		SBMO	8030.59	0.365169
WT	1537.59	0.270492		SBMO	8322	0.370787
WT	1628.2	0.27459		SBMO	8365.61	0.376404
WT	1639.7	0.278689		SBMO	8693.4	0.382022
WT	1657	0.282787		SBMO	8965.8	0.38764
WT	1699.1	0.286885		SBMO	8987	0.393258
WT	1732.94	0.290984		SBMO	9310.75	0.398876
WT	1737.81	0.295082		SBMO	9334.66	0.404494
WT	1785.2	0.29918		SBMO	9485.4	0.410112
WT	1890	0.303279		SBMO	9773.05	0.41573
WT	1892.1	0.307377		SBMO	10176.7	0.421348
WT	1915.85	0.311475		SBMO	10602.6	0.426966
WT	1915.9	0.315574		SBMO	10981.3	0.432584
WT	1923.41	0.319672		SBMO	11132.9	0.438202
WT	1926.53	0.32377		SBMO	11170.3	0.44382
WT	1946.5	0.327869		SBMO	11490	0.449438
WT	2076.5	0.331967		SBMO	11552	0.455056
WT	2083.05	0.336066		SBMO	11859.4	0.460674
WT	2099.84	0.340164		SBMO	12134.5	0.466292
WT	2163.65	0.344262		SBMO	12238.1	0.47191
WT	2262.09	0.348361		SBMO	12432.5	0.477528
WT	2269.3	0.352459		SBMO	12682.1	0.483146
WT	2309.31	0.356557		SBMO	12726.3	0.488764
WT	2311.15	0.360656		SBMO	13586.5	0.494382
WT	2333.22	0.364754		SBMO	13799.6	0.5
WT	2363.41	0.368852		SBMO	14120.2	0.505618
WT	2428.25	0.372951		SBMO	15703.2	0.511236
WT	2443.85	0.377049		SBMO	15846.8	0.516854
WT	2499.41	0.381148		SBMO	16443.3	0.522472
WT	2559.89	0.385246		SBMO	16707.9	0.52809
WT	2567.59	0.389344		SBMO	17051	0.533708
WT	2570.75	0.393443		SBMO	17427	0.539326
WT	2659.84	0.397541		SBMO	17665.6	0.544944
WT	2667.45	0.401639		SBMO	17702.8	0.550562
WT	2687.75	0.405738		SBMO	17741.4	0.55618
WT	2712.38	0.409836		SBMO	19090.8	0.561798
WT	2719.16	0.413934		SBMO	19194	0.567416
WT	2753.55	0.418033		SBMO	19213.8	0.573034
WT	2797.91	0.422131		SBMO	19234.8	0.578652
WT	2893.44	0.42623		SBMO	19653.2	0.58427
WT	2913.11	0.430328		SBMO	19838.1	0.589888
WT	3026.25	0.434426		SBMO	20410.1	0.595506
WT	3077.09	0.438525		SBMO	20537.1	0.601124
WT	3091.85	0.442623		SBMO	20591.2	0.606742
WT	3109.09	0.446721		SBMO	21012.8	0.61236
WT	3127.22	0.45082		SBMO	21078.2	0.617978
WT	3160.5	0.454918		SBMO	21254.7	0.623596
WT	3208.45	0.459016		SBMO	21762.8	0.629213
WT	3213.62	0.463115		SBMO	22226.2	0.634831
WT	3218.55	0.467213		SBMO	22281.2	0.640449
WT	3287.34	0.471311		SBMO	22536.8	0.646067
WT	3319.88	0.47541		SBMO	23650.3	0.651685
WT	3389.38	0.479508		SBMO	24366	0.657303
WT	3429.5	0.483607		SBMO	24967.9	0.662921
WT	3445.19	0.487705		SBMO	25120.2	0.668539
WT	3449.25	0.491803		SBMO	26515.1	0.674157
WT	3464.31	0.495902		SBMO	28445.2	0.679775
WT	3485.7	0.5		SBMO	28524.3	0.685393
WT	3499.03	0.504098		SBMO	28613.9	0.691011
WT	3605.56	0.508197		SBMO	29400.8	0.696629
WT	3607.94	0.512295		SBMO	29850.1	0.702247
WT	3668.65	0.516393		SBMO	29906.6	0.707865
WT	3770.16	0.520492		SBMO	32691.5	0.713483
WT	3816.16	0.52459		SBMO	33296.3	0.719101
WT	3830	0.528689		SBMO	33565.1	0.724719
WT	3928	0.532787		SBMO	33637.1	0.730337
WT	4103.15	0.536885		SBMO	35752.7	0.735955
WT	4157.41	0.540984		SBMO	35774.2	0.741573
WT	4288.59	0.545082		SBMO	35937.7	0.747191
WT	4356.4	0.54918		SBMO	36136.2	0.752809
WT	4491.06	0.553279		SBMO	37174.5	0.758427
WT	4510	0.557377		SBMO	37324.8	0.764045
WT	4595.7	0.561475		SBMO	37628.8	0.769663
WT	4636.9	0.565574		SBMO	38004.4	0.775281
WT	4642.19	0.569672		SBMO	38851.2	0.780899
WT	5041.41	0.57377		SBMO	40716.7	0.786517
WT	5103.69	0.577869		SBMO	42607.5	0.792135
WT	5117.35	0.581967		SBMO	43300.2	0.797753
WT	5317.55	0.586066		SBMO	44535.8	0.803371
WT	5537	0.590164		SBMO	44626.5	0.808989
WT	5542.34	0.594262		SBMO	45314.2	0.814607
WT	5788.69	0.598361		SBMO	46135	0.820225
WT	5818.4	0.602459		SBMO	46201.5	0.825843
WT	5879.09	0.606557		SBMO	49070.1	0.831461
WT	5912.7	0.610656		SBMO	50280.8	0.837079
WT	5941.7	0.614754		SBMO	50827.7	0.842697
WT	6065	0.618852		SBMO	59853	0.848315
WT	6112.41	0.622951		SBMO	61516.1	0.853933
WT	6264	0.627049		SBMO	62156.9	0.859551
WT	6332.45	0.631148		SBMO	63804.4	0.865169
WT	6901.75	0.635246		SBMO	63889.9	0.870787
WT	6967.59	0.639344		SBMO	64611.1	0.876404
WT	6972.34	0.643443		SBMO	65299.8	0.882022
WT	7060.25	0.647541		SBMO	72652.3	0.88764
WT	7244.34	0.651639		SBMO	76877.9	0.893258
WT	7362.66	0.655738		SBMO	77456.2	0.898876
WT	7509.16	0.659836		SBMO	77505.6	0.904494
WT	7521.09	0.663934		SBMO	86996.7	0.910112
WT	7531.8	0.668033		SBMO	92278.2	0.91573
WT	7675.8	0.672131		SBMO	92909.4	0.921348
WT	7711.75	0.67623		SBMO	94228.7	0.926966
WT	7800.41	0.680328		SBMO	97272	0.932584
WT	7981.19	0.684426		SBMO	103483	0.938202
WT	8011.55	0.688525		SBMO	105136	0.94382
WT	8075.25	0.692623		SBMO	106130	0.949438
WT	8133.34	0.696721		SBMO	108450	0.955056
WT	8248.44	0.70082		SBMO	119880	0.960674
WT	8267.15	0.704918		SBMO	119987	0.966292
WT	8421.85	0.709016		SBMO	131309	0.97191
WT	8494.6	0.713115		SBMO	132313	0.977528
WT	8576.03	0.717213		SBMO	144157	0.983146
WT	8728.16	0.721311		SBMO	144530	0.988764
WT	9063.95	0.72541		SBMO	194612	0.994382
WT	9446.69	0.729508		SBMO	729348	1
WT	9532.31	0.733607
WT	9650.45	0.737705
WT	10147.2	0.741803
WT	10338.3	0.745902
WT	10407.7	0.75
WT	10935.4	0.754098
WT	10956.6	0.758197
WT	10991.1	0.762295
WT	11274.8	0.766393
WT	11349.4	0.770492
WT	11472.4	0.77459
WT	11547.5	0.778689
WT	11783.5	0.782787
WT	12764.6	0.786885
WT	12782.1	0.790984
WT	13074.5	0.795082
WT	14016.5	0.79918
WT	14087.2	0.803279
WT	14436.9	0.807377
WT	15623.2	0.811475
WT	15864.3	0.815574
WT	16444.2	0.819672
WT	16516.7	0.82377
WT	17083.3	0.827869
WT	17732.5	0.831967
WT	18034.4	0.836066
WT	18144.9	0.840164
WT	18527.2	0.844262
WT	18770.2	0.848361
WT	19542.1	0.852459
WT	20041.7	0.856557
WT	23129.6	0.860656
WT	24013.6	0.864754
WT	24299.4	0.868852
WT	24304.9	0.872951
WT	24524.5	0.877049
WT	25457.4	0.881148
WT	26013.8	0.885246
WT	26063.2	0.889344
WT	26121.9	0.893443
WT	26250	0.897541
WT	26572.7	0.901639
WT	26698.8	0.905738
WT	27184.2	0.909836
WT	28909.9	0.913934
WT	29320.3	0.918033
WT	30546.9	0.922131
WT	31619.2	0.92623
WT	32938.1	0.930328
WT	34243.9	0.934426
WT	34593.7	0.938525
WT	35512.6	0.942623
WT	38303.4	0.946721
WT	41705.6	0.95082
WT	43743.9	0.954918
WT	43977.2	0.959016
WT	46780.8	0.963115
WT	53076.9	0.967213
WT	53638.2	0.971311
WT	54781.3	0.97541
WT	64327.5	0.979508
WT	70676.5	0.983607
WT	78671.1	0.987705
WT	83987	0.991803
WT	190613	0.995902
WT	203770	1

## Sheet: amp
Group	Peak Amplitude(pA)	cf		Group	Peak Amplitude(pA)	cf
WT	-3.48487	0.004		SBMO	-4.1986	0.00531915
WT	-3.77471	0.008		SBMO	-4.26763	0.0106383
WT	-3.82692	0.012		SBMO	-4.74916	0.0159574
WT	-3.87576	0.016		SBMO	-4.81893	0.0212766
WT	-4.01698	0.02		SBMO	-4.84939	0.0265957
WT	-4.10732	0.024		SBMO	-4.91767	0.0319149
WT	-4.13558	0.028		SBMO	-5.04016	0.037234
WT	-4.17128	0.032		SBMO	-5.07793	0.0425532
WT	-4.41209	0.036		SBMO	-5.13569	0.0478723
WT	-4.48364	0.04		SBMO	-5.26105	0.0531915
WT	-4.57232	0.044		SBMO	-5.26124	0.0585106
WT	-4.59402	0.048		SBMO	-5.47352	0.0638298
WT	-4.60896	0.052		SBMO	-5.51758	0.0691489
WT	-4.65313	0.056		SBMO	-5.64754	0.0744681
WT	-4.73025	0.06		SBMO	-5.65846	0.0797872
WT	-4.74922	0.064		SBMO	-5.69642	0.0851064
WT	-4.84688	0.068		SBMO	-5.69872	0.0904255
WT	-4.8548	0.072		SBMO	-5.72273	0.0957447
WT	-4.85709	0.076		SBMO	-5.72506	0.101064
WT	-5.06594	0.08		SBMO	-5.80118	0.106383
WT	-5.09015	0.084		SBMO	-5.89727	0.111702
WT	-5.11526	0.088		SBMO	-5.99998	0.117021
WT	-5.12051	0.092		SBMO	-6.06181	0.12234
WT	-5.15786	0.096		SBMO	-6.09454	0.12766
WT	-5.1707	0.1		SBMO	-6.1255	0.132979
WT	-5.22831	0.104		SBMO	-6.12847	0.138298
WT	-5.24531	0.108		SBMO	-6.18998	0.143617
WT	-5.30189	0.112		SBMO	-6.20575	0.148936
WT	-5.3055	0.116		SBMO	-6.2736	0.154255
WT	-5.34726	0.12		SBMO	-6.29307	0.159574
WT	-5.35899	0.124		SBMO	-6.30568	0.164894
WT	-5.37469	0.128		SBMO	-6.33072	0.170213
WT	-5.37966	0.132		SBMO	-6.52143	0.175532
WT	-5.44377	0.136		SBMO	-6.56092	0.180851
WT	-5.59149	0.14		SBMO	-6.58399	0.18617
WT	-5.67662	0.144		SBMO	-6.58806	0.191489
WT	-5.68434	0.148		SBMO	-6.62385	0.196809
WT	-5.6927	0.152		SBMO	-6.64004	0.202128
WT	-5.78895	0.156		SBMO	-6.64316	0.207447
WT	-5.7898	0.16		SBMO	-6.65587	0.212766
WT	-5.82052	0.164		SBMO	-6.66321	0.218085
WT	-5.85067	0.168		SBMO	-6.6651	0.223404
WT	-5.93856	0.172		SBMO	-6.68236	0.228723
WT	-5.97996	0.176		SBMO	-6.7524	0.234043
WT	-5.98764	0.18		SBMO	-6.89833	0.239362
WT	-5.99038	0.184		SBMO	-6.97655	0.244681
WT	-5.99414	0.188		SBMO	-6.97917	0.25
WT	-6.08338	0.192		SBMO	-6.98213	0.255319
WT	-6.08354	0.196		SBMO	-7.04671	0.260638
WT	-6.08416	0.2		SBMO	-7.04967	0.265957
WT	-6.0891	0.204		SBMO	-7.05724	0.271277
WT	-6.09269	0.208		SBMO	-7.17025	0.276596
WT	-6.10658	0.212		SBMO	-7.20974	0.281915
WT	-6.11951	0.216		SBMO	-7.24431	0.287234
WT	-6.12904	0.22		SBMO	-7.24924	0.292553
WT	-6.13466	0.224		SBMO	-7.28205	0.297872
WT	-6.14926	0.228		SBMO	-7.30783	0.303191
WT	-6.1555	0.232		SBMO	-7.33825	0.308511
WT	-6.15581	0.236		SBMO	-7.37485	0.31383
WT	-6.18263	0.24		SBMO	-7.39544	0.319149
WT	-6.19627	0.244		SBMO	-7.45317	0.324468
WT	-6.24179	0.248		SBMO	-7.48442	0.329787
WT	-6.25058	0.252		SBMO	-7.52465	0.335106
WT	-6.25383	0.256		SBMO	-7.54701	0.340426
WT	-6.26449	0.26		SBMO	-7.59847	0.345745
WT	-6.26499	0.264		SBMO	-7.72267	0.351064
WT	-6.28257	0.268		SBMO	-7.76998	0.356383
WT	-6.28752	0.272		SBMO	-7.7991	0.361702
WT	-6.33341	0.276		SBMO	-7.80838	0.367021
WT	-6.34824	0.28		SBMO	-7.81267	0.37234
WT	-6.35624	0.284		SBMO	-7.83202	0.37766
WT	-6.39526	0.288		SBMO	-7.8709	0.382979
WT	-6.44561	0.292		SBMO	-7.87865	0.388298
WT	-6.48544	0.296		SBMO	-7.95938	0.393617
WT	-6.54543	0.3		SBMO	-8.04136	0.398936
WT	-6.56642	0.304		SBMO	-8.11056	0.404255
WT	-6.58908	0.308		SBMO	-8.12528	0.409574
WT	-6.60067	0.312		SBMO	-8.1283	0.414894
WT	-6.60444	0.316		SBMO	-8.13612	0.420213
WT	-6.60794	0.32		SBMO	-8.20597	0.425532
WT	-6.61415	0.324		SBMO	-8.20949	0.430851
WT	-6.61751	0.328		SBMO	-8.27581	0.43617
WT	-6.63224	0.332		SBMO	-8.36792	0.441489
WT	-6.70493	0.336		SBMO	-8.37769	0.446809
WT	-6.71532	0.34		SBMO	-8.40346	0.452128
WT	-6.74458	0.344		SBMO	-8.45982	0.457447
WT	-6.7671	0.348		SBMO	-8.48819	0.462766
WT	-6.77225	0.352		SBMO	-8.4917	0.468085
WT	-6.94022	0.356		SBMO	-8.49544	0.473404
WT	-6.96115	0.36		SBMO	-8.50687	0.478723
WT	-6.97139	0.364		SBMO	-8.51099	0.484043
WT	-6.98861	0.368		SBMO	-8.64451	0.489362
WT	-7.00631	0.372		SBMO	-8.67185	0.494681
WT	-7.05987	0.376		SBMO	-8.71026	0.5
WT	-7.09149	0.38		SBMO	-8.73969	0.505319
WT	-7.12052	0.384		SBMO	-8.74008	0.510638
WT	-7.12668	0.388		SBMO	-8.78244	0.515957
WT	-7.15387	0.392		SBMO	-8.8123	0.521277
WT	-7.17651	0.396		SBMO	-8.87673	0.526596
WT	-7.24948	0.4		SBMO	-8.938	0.531915
WT	-7.26494	0.404		SBMO	-9.01503	0.537234
WT	-7.32328	0.408		SBMO	-9.31655	0.542553
WT	-7.36959	0.412		SBMO	-9.3604	0.547872
WT	-7.38589	0.416		SBMO	-9.37935	0.553191
WT	-7.40595	0.42		SBMO	-9.38593	0.558511
WT	-7.43145	0.424		SBMO	-9.51481	0.56383
WT	-7.44249	0.428		SBMO	-9.69328	0.569149
WT	-7.48774	0.432		SBMO	-9.73014	0.574468
WT	-7.56242	0.436		SBMO	-9.74233	0.579787
WT	-7.58178	0.44		SBMO	-9.75441	0.585106
WT	-7.62975	0.444		SBMO	-9.78084	0.590426
WT	-7.6669	0.448		SBMO	-9.78846	0.595745
WT	-7.70138	0.452		SBMO	-9.7997	0.601064
WT	-7.71742	0.456		SBMO	-9.80843	0.606383
WT	-7.75207	0.46		SBMO	-9.82377	0.611702
WT	-7.75774	0.464		SBMO	-9.85186	0.617021
WT	-7.80917	0.468		SBMO	-9.88009	0.62234
WT	-7.89096	0.472		SBMO	-9.89331	0.62766
WT	-7.94419	0.476		SBMO	-9.9683	0.632979
WT	-7.94425	0.48		SBMO	-10.013	0.638298
WT	-8.07087	0.484		SBMO	-10.0532	0.643617
WT	-8.0738	0.488		SBMO	-10.1374	0.648936
WT	-8.08727	0.492		SBMO	-10.3519	0.654255
WT	-8.10753	0.496		SBMO	-10.3704	0.659574
WT	-8.13475	0.5		SBMO	-10.4015	0.664894
WT	-8.17874	0.504		SBMO	-10.4807	0.670213
WT	-8.19701	0.508		SBMO	-10.7456	0.675532
WT	-8.26703	0.512		SBMO	-10.8501	0.680851
WT	-8.28102	0.516		SBMO	-10.8589	0.68617
WT	-8.2938	0.52		SBMO	-11.0626	0.691489
WT	-8.31098	0.524		SBMO	-11.0628	0.696809
WT	-8.33635	0.528		SBMO	-11.2101	0.702128
WT	-8.43087	0.532		SBMO	-11.3488	0.707447
WT	-8.44023	0.536		SBMO	-11.4176	0.712766
WT	-8.44038	0.54		SBMO	-11.5059	0.718085
WT	-8.46794	0.544		SBMO	-11.5698	0.723404
WT	-8.51015	0.548		SBMO	-11.6106	0.728723
WT	-8.51642	0.552		SBMO	-11.7994	0.734043
WT	-8.53218	0.556		SBMO	-11.7999	0.739362
WT	-8.54246	0.56		SBMO	-11.8788	0.744681
WT	-8.57741	0.564		SBMO	-12.0263	0.75
WT	-8.60738	0.568		SBMO	-12.2865	0.755319
WT	-8.61804	0.572		SBMO	-12.3307	0.760638
WT	-8.62159	0.576		SBMO	-12.5359	0.765957
WT	-8.62658	0.58		SBMO	-13.0194	0.771277
WT	-8.66993	0.584		SBMO	-13.0321	0.776596
WT	-8.72967	0.588		SBMO	-13.1349	0.781915
WT	-8.79607	0.592		SBMO	-13.2639	0.787234
WT	-8.87277	0.596		SBMO	-13.36	0.792553
WT	-8.92554	0.6		SBMO	-13.5201	0.797872
WT	-8.94728	0.604		SBMO	-13.5582	0.803191
WT	-8.96508	0.608		SBMO	-13.5814	0.808511
WT	-8.9914	0.612		SBMO	-13.6713	0.81383
WT	-9.03927	0.616		SBMO	-13.9023	0.819149
WT	-9.04165	0.62		SBMO	-14.002	0.824468
WT	-9.05015	0.624		SBMO	-14.0931	0.829787
WT	-9.10691	0.628		SBMO	-14.3008	0.835106
WT	-9.23287	0.632		SBMO	-14.7058	0.840426
WT	-9.25901	0.636		SBMO	-15.1729	0.845745
WT	-9.34458	0.64		SBMO	-15.2636	0.851064
WT	-9.3472	0.644		SBMO	-15.29	0.856383
WT	-9.42572	0.648		SBMO	-15.2936	0.861702
WT	-9.43703	0.652		SBMO	-15.4366	0.867021
WT	-9.47103	0.656		SBMO	-15.4895	0.87234
WT	-9.50741	0.66		SBMO	-15.528	0.87766
WT	-9.64723	0.664		SBMO	-15.5746	0.882979
WT	-9.70475	0.668		SBMO	-15.5855	0.888298
WT	-9.74579	0.672		SBMO	-16.1756	0.893617
WT	-9.77062	0.676		SBMO	-16.359	0.898936
WT	-9.84606	0.68		SBMO	-16.5941	0.904255
WT	-9.85219	0.684		SBMO	-16.768	0.909574
WT	-10.1219	0.688		SBMO	-16.8791	0.914894
WT	-10.1388	0.692		SBMO	-18.0747	0.920213
WT	-10.1411	0.696		SBMO	-18.7196	0.925532
WT	-10.1623	0.7		SBMO	-19.1912	0.930851
WT	-10.1934	0.704		SBMO	-19.349	0.93617
WT	-10.2147	0.708		SBMO	-19.8812	0.941489
WT	-10.2574	0.712		SBMO	-21.9408	0.946809
WT	-10.3756	0.716		SBMO	-22.3632	0.952128
WT	-10.4069	0.72		SBMO	-26.3508	0.957447
WT	-10.42	0.724		SBMO	-26.7831	0.962766
WT	-10.4583	0.728		SBMO	-27.9862	0.968085
WT	-10.4824	0.732		SBMO	-29.2534	0.973404
WT	-10.5278	0.736		SBMO	-31.8808	0.978723
WT	-10.6038	0.74		SBMO	-32.4603	0.984043
WT	-10.7327	0.744		SBMO	-33.9782	0.989362
WT	-10.7937	0.748		SBMO	-44.7318	0.994681
WT	-10.8834	0.752		SBMO	-66.1852	1
WT	-11.1076	0.756
WT	-11.1207	0.76
WT	-11.1503	0.764
WT	-11.1886	0.768
WT	-11.2713	0.772
WT	-11.3858	0.776
WT	-11.4351	0.78
WT	-11.4656	0.784
WT	-11.4846	0.788
WT	-11.7473	0.792
WT	-11.819	0.796
WT	-11.887	0.8
WT	-11.8956	0.804
WT	-11.925	0.808
WT	-12.0211	0.812
WT	-12.065	0.816
WT	-12.1231	0.82
WT	-12.2434	0.824
WT	-12.2448	0.828
WT	-12.3494	0.832
WT	-12.4296	0.836
WT	-12.5515	0.84
WT	-12.5518	0.844
WT	-12.6019	0.848
WT	-12.6729	0.852
WT	-12.6797	0.856
WT	-12.744	0.86
WT	-12.8061	0.864
WT	-12.8466	0.868
WT	-13.5428	0.872
WT	-13.8045	0.876
WT	-13.9664	0.88
WT	-14.1277	0.884
WT	-14.5006	0.888
WT	-14.5033	0.892
WT	-15.2935	0.896
WT	-16.054	0.9
WT	-16.3962	0.904
WT	-17.3987	0.908
WT	-18.0118	0.912
WT	-19.0901	0.916
WT	-19.1824	0.92
WT	-19.2952	0.924
WT	-19.3447	0.928
WT	-19.4192	0.932
WT	-20.1108	0.936
WT	-20.6044	0.94
WT	-22.3414	0.944
WT	-23.5913	0.948
WT	-23.8768	0.952
WT	-23.9383	0.956
WT	-24.1226	0.96
WT	-25.1147	0.964
WT	-25.8661	0.968
WT	-30.0349	0.972
WT	-38.0676	0.976
WT	-46.3041	0.98
WT	-46.9506	0.984
WT	-51.1702	0.988
WT	-55.9179	0.992
WT	-69.0666	0.996
WT	-75.5904	1

## Sheet: rise10-90
Group	rise time 10% to 90%(ms)	cf		Group	rise time 10% to 90%(ms)	cf
WT	0.0840121	0.00421941		SBMO	0.152967	0.00531915
WT	0.0935612	0.00843882		SBMO	0.157935	0.0106383
WT	0.130751	0.0126582		SBMO	0.172164	0.0159574
WT	0.192254	0.0168776		SBMO	0.202806	0.0212766
WT	0.192601	0.021097		SBMO	0.212682	0.0265957
WT	0.193901	0.0253165		SBMO	0.22589	0.0319149
WT	0.195919	0.0295359		SBMO	0.236711	0.037234
WT	0.20031	0.0337553		SBMO	0.258065	0.0425532
WT	0.224891	0.0379747		SBMO	0.267306	0.0478723
WT	0.233023	0.0421941		SBMO	0.27533	0.0531915
WT	0.246682	0.0464135		SBMO	0.278545	0.0585106
WT	0.248851	0.0506329		SBMO	0.278606	0.0638298
WT	0.249846	0.0548523		SBMO	0.294187	0.0691489
WT	0.25034	0.0590717		SBMO	0.295783	0.0744681
WT	0.251012	0.0632911		SBMO	0.308538	0.0797872
WT	0.251214	0.0675105		SBMO	0.310215	0.0851064
WT	0.255491	0.07173		SBMO	0.312438	0.0904255
WT	0.262551	0.0759494		SBMO	0.314566	0.0957447
WT	0.266288	0.0801688		SBMO	0.315806	0.101064
WT	0.282668	0.0843882		SBMO	0.323679	0.106383
WT	0.288245	0.0886076		SBMO	0.331902	0.111702
WT	0.289508	0.092827		SBMO	0.334315	0.117021
WT	0.291568	0.0970464		SBMO	0.357367	0.12234
WT	0.300274	0.101266		SBMO	0.361364	0.12766
WT	0.314855	0.105485		SBMO	0.365117	0.132979
WT	0.32039	0.109705		SBMO	0.366488	0.138298
WT	0.329146	0.113924		SBMO	0.375327	0.143617
WT	0.329871	0.118143		SBMO	0.37672	0.148936
WT	0.340348	0.122363		SBMO	0.393393	0.154255
WT	0.35004	0.126582		SBMO	0.400195	0.159574
WT	0.367474	0.130802		SBMO	0.415305	0.164894
WT	0.372991	0.135021		SBMO	0.418362	0.170213
WT	0.388337	0.139241		SBMO	0.424671	0.175532
WT	0.390462	0.14346		SBMO	0.435264	0.180851
WT	0.393757	0.147679		SBMO	0.462137	0.18617
WT	0.406218	0.151899		SBMO	0.467986	0.191489
WT	0.41632	0.156118		SBMO	0.47559	0.196809
WT	0.417696	0.160338		SBMO	0.484473	0.202128
WT	0.42059	0.164557		SBMO	0.486448	0.207447
WT	0.425074	0.168776		SBMO	0.494778	0.212766
WT	0.435047	0.172996		SBMO	0.506151	0.218085
WT	0.451958	0.177215		SBMO	0.508871	0.223404
WT	0.475008	0.181435		SBMO	0.515155	0.228723
WT	0.482112	0.185654		SBMO	0.531572	0.234043
WT	0.492723	0.189873		SBMO	0.540262	0.239362
WT	0.498123	0.194093		SBMO	0.542603	0.244681
WT	0.540988	0.198312		SBMO	0.543284	0.25
WT	0.542199	0.202532		SBMO	0.571353	0.255319
WT	0.543416	0.206751		SBMO	0.574243	0.260638
WT	0.549807	0.21097		SBMO	0.587159	0.265957
WT	0.561867	0.21519		SBMO	0.58717	0.271277
WT	0.563557	0.219409		SBMO	0.589609	0.276596
WT	0.56841	0.223629		SBMO	0.602812	0.281915
WT	0.574622	0.227848		SBMO	0.60889	0.287234
WT	0.589438	0.232068		SBMO	0.613802	0.292553
WT	0.622607	0.236287		SBMO	0.61612	0.297872
WT	0.635229	0.240506		SBMO	0.640015	0.303191
WT	0.6358	0.244726		SBMO	0.664642	0.308511
WT	0.643453	0.248945		SBMO	0.66882	0.31383
WT	0.644637	0.253165		SBMO	0.676449	0.319149
WT	0.645206	0.257384		SBMO	0.676933	0.324468
WT	0.646389	0.261603		SBMO	0.699745	0.329787
WT	0.646848	0.265823		SBMO	0.705694	0.335106
WT	0.647545	0.270042		SBMO	0.709314	0.340426
WT	0.654669	0.274262		SBMO	0.71596	0.345745
WT	0.65859	0.278481		SBMO	0.716554	0.351064
WT	0.664677	0.2827		SBMO	0.718824	0.356383
WT	0.671033	0.28692		SBMO	0.726153	0.361702
WT	0.679791	0.291139		SBMO	0.731439	0.367021
WT	0.681556	0.295359		SBMO	0.735924	0.37234
WT	0.683184	0.299578		SBMO	0.736989	0.37766
WT	0.686328	0.303797		SBMO	0.755251	0.382979
WT	0.692128	0.308017		SBMO	0.75831	0.388298
WT	0.698849	0.312236		SBMO	0.75976	0.393617
WT	0.700912	0.316456		SBMO	0.764882	0.398936
WT	0.719095	0.320675		SBMO	0.777866	0.404255
WT	0.720676	0.324895		SBMO	0.784761	0.409574
WT	0.724968	0.329114		SBMO	0.793739	0.414894
WT	0.729399	0.333333		SBMO	0.795755	0.420213
WT	0.736227	0.337553		SBMO	0.79934	0.425532
WT	0.771896	0.341772		SBMO	0.800453	0.430851
WT	0.772634	0.345992		SBMO	0.810588	0.43617
WT	0.776618	0.350211		SBMO	0.811021	0.441489
WT	0.790826	0.35443		SBMO	0.821148	0.446809
WT	0.794964	0.35865		SBMO	0.834542	0.452128
WT	0.796221	0.362869		SBMO	0.839064	0.457447
WT	0.808105	0.367089		SBMO	0.839342	0.462766
WT	0.824976	0.371308		SBMO	0.845044	0.468085
WT	0.826417	0.375527		SBMO	0.855861	0.473404
WT	0.837335	0.379747		SBMO	0.856093	0.478723
WT	0.839258	0.383966		SBMO	0.85735	0.484043
WT	0.847097	0.388186		SBMO	0.861858	0.489362
WT	0.853355	0.392405		SBMO	0.86903	0.494681
WT	0.861449	0.396624		SBMO	0.88141	0.5
WT	0.868554	0.400844		SBMO	0.891907	0.505319
WT	0.872852	0.405063		SBMO	0.903199	0.510638
WT	0.896844	0.409283		SBMO	0.906395	0.515957
WT	0.900394	0.413502		SBMO	0.918984	0.521277
WT	0.900545	0.417722		SBMO	0.933097	0.526596
WT	0.907983	0.421941		SBMO	0.934523	0.531915
WT	0.913726	0.42616		SBMO	0.940388	0.537234
WT	0.918873	0.43038		SBMO	0.973985	0.542553
WT	0.927061	0.434599		SBMO	0.994431	0.547872
WT	0.942781	0.438819		SBMO	0.995131	0.553191
WT	0.946827	0.443038		SBMO	0.995379	0.558511
WT	0.953428	0.447257		SBMO	0.996238	0.56383
WT	0.954053	0.451477		SBMO	1.00601	0.569149
WT	0.955644	0.455696		SBMO	1.01249	0.574468
WT	0.961892	0.459916		SBMO	1.01852	0.579787
WT	0.965352	0.464135		SBMO	1.01962	0.585106
WT	0.967508	0.468354		SBMO	1.02311	0.590426
WT	0.971765	0.472574		SBMO	1.02889	0.595745
WT	0.973575	0.476793		SBMO	1.05687	0.601064
WT	0.974706	0.481013		SBMO	1.05718	0.606383
WT	0.975622	0.485232		SBMO	1.06975	0.611702
WT	0.979827	0.489451		SBMO	1.07353	0.617021
WT	0.980764	0.493671		SBMO	1.07929	0.62234
WT	0.98085	0.49789		SBMO	1.10006	0.62766
WT	0.980943	0.50211		SBMO	1.10421	0.632979
WT	0.988981	0.506329		SBMO	1.10608	0.638298
WT	0.997006	0.510549		SBMO	1.12531	0.643617
WT	0.999903	0.514768		SBMO	1.1551	0.648936
WT	1.01211	0.518987		SBMO	1.1577	0.654255
WT	1.0133	0.523207		SBMO	1.16163	0.659574
WT	1.02291	0.527426		SBMO	1.21104	0.664894
WT	1.0232	0.531646		SBMO	1.21967	0.670213
WT	1.02538	0.535865		SBMO	1.22122	0.675532
WT	1.04048	0.540084		SBMO	1.2223	0.680851
WT	1.05938	0.544304		SBMO	1.22891	0.68617
WT	1.07751	0.548523		SBMO	1.23447	0.691489
WT	1.08025	0.552743		SBMO	1.24358	0.696809
WT	1.0952	0.556962		SBMO	1.25017	0.702128
WT	1.09554	0.561181		SBMO	1.2514	0.707447
WT	1.09631	0.565401		SBMO	1.25171	0.712766
WT	1.1054	0.56962		SBMO	1.25611	0.718085
WT	1.11627	0.57384		SBMO	1.26739	0.723404
WT	1.11739	0.578059		SBMO	1.30346	0.728723
WT	1.12039	0.582278		SBMO	1.30461	0.734043
WT	1.13502	0.586498		SBMO	1.30897	0.739362
WT	1.13553	0.590717		SBMO	1.3232	0.744681
WT	1.14158	0.594937		SBMO	1.3373	0.75
WT	1.14304	0.599156		SBMO	1.35086	0.755319
WT	1.14777	0.603376		SBMO	1.37288	0.760638
WT	1.15842	0.607595		SBMO	1.38759	0.765957
WT	1.18139	0.611814		SBMO	1.39645	0.771277
WT	1.1945	0.616034		SBMO	1.40418	0.776596
WT	1.19544	0.620253		SBMO	1.43445	0.781915
WT	1.19723	0.624473		SBMO	1.44196	0.787234
WT	1.19759	0.628692		SBMO	1.44267	0.792553
WT	1.20481	0.632911		SBMO	1.44525	0.797872
WT	1.20798	0.637131		SBMO	1.46677	0.803191
WT	1.20984	0.64135		SBMO	1.47026	0.808511
WT	1.2163	0.64557		SBMO	1.49439	0.81383
WT	1.22008	0.649789		SBMO	1.52386	0.819149
WT	1.23831	0.654008		SBMO	1.52841	0.824468
WT	1.23947	0.658228		SBMO	1.53448	0.829787
WT	1.24231	0.662447		SBMO	1.54896	0.835106
WT	1.2433	0.666667		SBMO	1.58086	0.840426
WT	1.26021	0.670886		SBMO	1.6004	0.845745
WT	1.26474	0.675105		SBMO	1.61085	0.851064
WT	1.2807	0.679325		SBMO	1.62658	0.856383
WT	1.2839	0.683544		SBMO	1.63206	0.861702
WT	1.28887	0.687764		SBMO	1.64488	0.867021
WT	1.32008	0.691983		SBMO	1.66391	0.87234
WT	1.32095	0.696203		SBMO	1.66456	0.87766
WT	1.32523	0.700422		SBMO	1.68941	0.882979
WT	1.33019	0.704641		SBMO	1.75315	0.888298
WT	1.33731	0.708861		SBMO	1.78293	0.893617
WT	1.33845	0.71308		SBMO	1.8436	0.898936
WT	1.35148	0.7173		SBMO	1.89661	0.904255
WT	1.35536	0.721519		SBMO	1.91578	0.909574
WT	1.35718	0.725738		SBMO	1.94245	0.914894
WT	1.35736	0.729958		SBMO	1.94605	0.920213
WT	1.36392	0.734177		SBMO	1.97999	0.925532
WT	1.38298	0.738397		SBMO	2.09977	0.930851
WT	1.3845	0.742616		SBMO	2.1069	0.93617
WT	1.40046	0.746835		SBMO	2.13582	0.941489
WT	1.41191	0.751055		SBMO	2.16849	0.946809
WT	1.41517	0.755274		SBMO	2.2224	0.952128
WT	1.4235	0.759494		SBMO	2.30199	0.957447
WT	1.43763	0.763713		SBMO	2.58928	0.962766
WT	1.43811	0.767932		SBMO	2.65751	0.968085
WT	1.44148	0.772152		SBMO	2.66377	0.973404
WT	1.44204	0.776371		SBMO	2.68624	0.978723
WT	1.44503	0.780591		SBMO	2.89002	0.984043
WT	1.45654	0.78481		SBMO	3.06653	0.989362
WT	1.45771	0.78903		SBMO	3.25559	0.994681
WT	1.47013	0.793249		SBMO	4.02294	1
WT	1.47316	0.797468
WT	1.47321	0.801688
WT	1.48403	0.805907
WT	1.531	0.810127
WT	1.54494	0.814346
WT	1.56253	0.818565
WT	1.57555	0.822785
WT	1.59214	0.827004
WT	1.60436	0.831224
WT	1.61735	0.835443
WT	1.64582	0.839662
WT	1.64726	0.843882
WT	1.68136	0.848101
WT	1.68438	0.852321
WT	1.71361	0.85654
WT	1.77186	0.860759
WT	1.77794	0.864979
WT	1.77888	0.869198
WT	1.79022	0.873418
WT	1.79441	0.877637
WT	1.79931	0.881857
WT	1.82482	0.886076
WT	1.92776	0.890295
WT	1.94391	0.894515
WT	2.03526	0.898734
WT	2.08162	0.902954
WT	2.10523	0.907173
WT	2.13337	0.911392
WT	2.13404	0.915612
WT	2.19155	0.919831
WT	2.26132	0.924051
WT	2.31986	0.92827
WT	2.36487	0.932489
WT	2.42121	0.936709
WT	2.51792	0.940928
WT	2.76342	0.945148
WT	2.86759	0.949367
WT	2.91371	0.953586
WT	3.01302	0.957806
WT	3.04374	0.962025
WT	3.34239	0.966245
WT	3.37398	0.970464
WT	3.53651	0.974684
WT	3.60257	0.978903
WT	4.20703	0.983122
WT	4.95902	0.987342
WT	4.95966	0.991561
WT	5.62949	0.995781
WT	6.44668	1

## Sheet: decay tau
Group	wt_decay tau(ms)	cf		Group	sbmo_decay tau(ms)	cf
WT	0.101022	0.00359712		SBMO	0.112533	0.00483092
WT	0.127482	0.00719424		SBMO	0.318303	0.00966184
WT	0.190312	0.0107914		SBMO	0.386971	0.0144928
WT	0.217928	0.0143885		SBMO	0.415677	0.0193237
WT	0.24515	0.0179856		SBMO	0.429379	0.0241546
WT	0.253798	0.0215827		SBMO	0.432452	0.0289855
WT	0.290335	0.0251799		SBMO	0.444686	0.0338164
WT	0.349122	0.028777		SBMO	0.477472	0.0386473
WT	0.352043	0.0323741		SBMO	0.513417	0.0434783
WT	0.452472	0.0359712		SBMO	0.525514	0.0483092
WT	0.465131	0.0395683		SBMO	0.550997	0.0531401
WT	0.466656	0.0431655		SBMO	0.559076	0.057971
WT	0.478535	0.0467626		SBMO	0.576372	0.0628019
WT	0.50544	0.0503597		SBMO	0.603303	0.0676329
WT	0.525888	0.0539568		SBMO	0.604437	0.0724638
WT	0.526336	0.057554		SBMO	0.630676	0.0772947
WT	0.535843	0.0611511		SBMO	0.679006	0.0821256
WT	0.544769	0.0647482		SBMO	0.683609	0.0869565
WT	0.556471	0.0683453		SBMO	0.704751	0.0917874
WT	0.559696	0.0719424		SBMO	0.711313	0.0966184
WT	0.573076	0.0755396		SBMO	0.715181	0.101449
WT	0.58256	0.0791367		SBMO	0.727871	0.10628
WT	0.586594	0.0827338		SBMO	0.772871	0.111111
WT	0.589537	0.0863309		SBMO	0.800506	0.115942
WT	0.633063	0.0899281		SBMO	0.818783	0.120773
WT	0.693601	0.0935252		SBMO	0.86509	0.125604
WT	0.694345	0.0971223		SBMO	0.897545	0.130435
WT	0.724274	0.100719		SBMO	0.899755	0.135266
WT	0.752516	0.104317		SBMO	0.937349	0.140097
WT	0.766744	0.107914		SBMO	0.94972	0.144928
WT	0.776647	0.111511		SBMO	0.976076	0.149758
WT	0.819727	0.115108		SBMO	0.993026	0.154589
WT	0.852263	0.118705		SBMO	1.0026	0.15942
WT	0.93193	0.122302		SBMO	1.00513	0.164251
WT	0.946654	0.125899		SBMO	1.02359	0.169082
WT	0.999791	0.129496		SBMO	1.09537	0.173913
WT	1.01333	0.133094		SBMO	1.11673	0.178744
WT	1.01391	0.136691		SBMO	1.16157	0.183575
WT	1.17595	0.140288		SBMO	1.17762	0.188406
WT	1.20816	0.143885		SBMO	1.23266	0.193237
WT	1.20925	0.147482		SBMO	1.23955	0.198068
WT	1.21771	0.151079		SBMO	1.24512	0.202899
WT	1.23833	0.154676		SBMO	1.26975	0.207729
WT	1.24934	0.158273		SBMO	1.33551	0.21256
WT	1.26391	0.161871		SBMO	1.34653	0.217391
WT	1.37957	0.165468		SBMO	1.36574	0.222222
WT	1.37973	0.169065		SBMO	1.38087	0.227053
WT	1.44255	0.172662		SBMO	1.42701	0.231884
WT	1.48118	0.176259		SBMO	1.42757	0.236715
WT	1.50659	0.179856		SBMO	1.42946	0.241546
WT	1.54104	0.183453		SBMO	1.4303	0.246377
WT	1.54227	0.18705		SBMO	1.45852	0.251208
WT	1.56797	0.190647		SBMO	1.48025	0.256039
WT	1.56882	0.194245		SBMO	1.48151	0.26087
WT	1.5897	0.197842		SBMO	1.51969	0.2657
WT	1.60125	0.201439		SBMO	1.54017	0.270531
WT	1.60548	0.205036		SBMO	1.54563	0.275362
WT	1.62066	0.208633		SBMO	1.55574	0.280193
WT	1.65398	0.21223		SBMO	1.59899	0.285024
WT	1.66368	0.215827		SBMO	1.60998	0.289855
WT	1.68042	0.219424		SBMO	1.67892	0.294686
WT	1.71295	0.223022		SBMO	1.69177	0.299517
WT	1.71536	0.226619		SBMO	1.71313	0.304348
WT	1.71632	0.230216		SBMO	1.71822	0.309179
WT	1.78493	0.233813		SBMO	1.73798	0.31401
WT	1.79308	0.23741		SBMO	1.77663	0.318841
WT	1.80376	0.241007		SBMO	1.79733	0.323671
WT	1.80671	0.244604		SBMO	1.80605	0.328502
WT	1.81104	0.248201		SBMO	1.80775	0.333333
WT	1.83196	0.251799		SBMO	1.82329	0.338164
WT	1.83417	0.255396		SBMO	1.82873	0.342995
WT	1.86623	0.258993		SBMO	1.82943	0.347826
WT	1.89671	0.26259		SBMO	1.88572	0.352657
WT	1.92457	0.266187		SBMO	1.88713	0.357488
WT	1.9472	0.269784		SBMO	1.90367	0.362319
WT	1.95974	0.273381		SBMO	1.92908	0.36715
WT	2.00439	0.276978		SBMO	2.02526	0.371981
WT	2.04231	0.280576		SBMO	2.0443	0.376812
WT	2.05102	0.284173		SBMO	2.05021	0.381643
WT	2.05819	0.28777		SBMO	2.08791	0.386473
WT	2.1157	0.291367		SBMO	2.09206	0.391304
WT	2.11604	0.294964		SBMO	2.09523	0.396135
WT	2.15435	0.298561		SBMO	2.09574	0.400966
WT	2.17341	0.302158		SBMO	2.12699	0.405797
WT	2.18542	0.305755		SBMO	2.17399	0.410628
WT	2.20466	0.309353		SBMO	2.2014	0.415459
WT	2.21478	0.31295		SBMO	2.26126	0.42029
WT	2.22031	0.316547		SBMO	2.2617	0.425121
WT	2.25961	0.320144		SBMO	2.26521	0.429952
WT	2.2763	0.323741		SBMO	2.28419	0.434783
WT	2.28808	0.327338		SBMO	2.29285	0.439614
WT	2.29429	0.330935		SBMO	2.30748	0.444444
WT	2.29456	0.334532		SBMO	2.31708	0.449275
WT	2.30128	0.338129		SBMO	2.34237	0.454106
WT	2.31193	0.341727		SBMO	2.34964	0.458937
WT	2.32005	0.345324		SBMO	2.36934	0.463768
WT	2.38026	0.348921		SBMO	2.46521	0.468599
WT	2.38704	0.352518		SBMO	2.47824	0.47343
WT	2.40194	0.356115		SBMO	2.50874	0.478261
WT	2.40241	0.359712		SBMO	2.57255	0.483092
WT	2.40421	0.363309		SBMO	2.58897	0.487923
WT	2.45252	0.366906		SBMO	2.62531	0.492754
WT	2.49105	0.370504		SBMO	2.62585	0.497585
WT	2.49743	0.374101		SBMO	2.6374	0.502415
WT	2.53491	0.377698		SBMO	2.65115	0.507246
WT	2.5466	0.381295		SBMO	2.69523	0.512077
WT	2.57113	0.384892		SBMO	2.71513	0.516908
WT	2.62238	0.388489		SBMO	2.77944	0.521739
WT	2.62766	0.392086		SBMO	2.77999	0.52657
WT	2.63027	0.395683		SBMO	2.81982	0.531401
WT	2.70922	0.399281		SBMO	2.82159	0.536232
WT	2.72946	0.402878		SBMO	2.84647	0.541063
WT	2.74416	0.406475		SBMO	2.85015	0.545894
WT	2.74487	0.410072		SBMO	2.87248	0.550725
WT	2.77663	0.413669		SBMO	3.03018	0.555556
WT	2.81952	0.417266		SBMO	3.03158	0.560386
WT	2.83479	0.420863		SBMO	3.03726	0.565217
WT	2.84281	0.42446		SBMO	3.10105	0.570048
WT	2.88343	0.428058		SBMO	3.14637	0.574879
WT	2.88906	0.431655		SBMO	3.25777	0.57971
WT	2.89096	0.435252		SBMO	3.26276	0.584541
WT	2.89147	0.438849		SBMO	3.28433	0.589372
WT	2.93468	0.442446		SBMO	3.30015	0.594203
WT	2.94484	0.446043		SBMO	3.3028	0.599034
WT	2.94716	0.44964		SBMO	3.30317	0.603865
WT	2.97434	0.453237		SBMO	3.34146	0.608696
WT	2.9757	0.456835		SBMO	3.34818	0.613527
WT	2.98467	0.460432		SBMO	3.35294	0.618357
WT	3.03929	0.464029		SBMO	3.38975	0.623188
WT	3.05381	0.467626		SBMO	3.4724	0.628019
WT	3.09508	0.471223		SBMO	3.48642	0.63285
WT	3.10123	0.47482		SBMO	3.49411	0.637681
WT	3.16914	0.478417		SBMO	3.53229	0.642512
WT	3.17298	0.482014		SBMO	3.54181	0.647343
WT	3.17485	0.485612		SBMO	3.54605	0.652174
WT	3.21622	0.489209		SBMO	3.60923	0.657005
WT	3.28809	0.492806		SBMO	3.62274	0.661836
WT	3.30932	0.496403		SBMO	3.664	0.666667
WT	3.31757	0.5		SBMO	3.67427	0.671498
WT	3.32328	0.503597		SBMO	3.73185	0.676329
WT	3.34635	0.507194		SBMO	3.94679	0.681159
WT	3.35295	0.510791		SBMO	4.13345	0.68599
WT	3.36637	0.514388		SBMO	4.15601	0.690821
WT	3.40691	0.517986		SBMO	4.17804	0.695652
WT	3.47895	0.521583		SBMO	4.25404	0.700483
WT	3.48969	0.52518		SBMO	4.28517	0.705314
WT	3.54429	0.528777		SBMO	4.29582	0.710145
WT	3.57155	0.532374		SBMO	4.42092	0.714976
WT	3.57724	0.535971		SBMO	4.45871	0.719807
WT	3.67939	0.539568		SBMO	4.53763	0.724638
WT	3.6974	0.543165		SBMO	4.54965	0.729469
WT	3.71782	0.546763		SBMO	4.70231	0.7343
WT	3.74529	0.55036		SBMO	4.74572	0.73913
WT	3.75011	0.553957		SBMO	4.93254	0.743961
WT	3.76602	0.557554		SBMO	4.95074	0.748792
WT	3.79428	0.561151		SBMO	5.00896	0.753623
WT	3.8234	0.564748		SBMO	5.0609	0.758454
WT	3.83487	0.568345		SBMO	5.19035	0.763285
WT	3.8424	0.571942		SBMO	5.30336	0.768116
WT	3.86449	0.57554		SBMO	5.32432	0.772947
WT	3.9545	0.579137		SBMO	5.36522	0.777778
WT	3.98613	0.582734		SBMO	5.40651	0.782609
WT	4.08249	0.586331		SBMO	5.50838	0.78744
WT	4.10285	0.589928		SBMO	5.51885	0.792271
WT	4.22618	0.593525		SBMO	5.88925	0.797101
WT	4.23217	0.597122		SBMO	5.95509	0.801932
WT	4.23462	0.600719		SBMO	6.19121	0.806763
WT	4.23681	0.604317		SBMO	6.19318	0.811594
WT	4.27871	0.607914		SBMO	6.30955	0.816425
WT	4.33284	0.611511		SBMO	6.32545	0.821256
WT	4.35413	0.615108		SBMO	7.1036	0.826087
WT	4.36268	0.618705		SBMO	7.2485	0.830918
WT	4.37606	0.622302		SBMO	7.27743	0.835749
WT	4.4024	0.625899		SBMO	7.29419	0.84058
WT	4.42012	0.629496		SBMO	7.61204	0.845411
WT	4.43948	0.633094		SBMO	7.64747	0.850242
WT	4.44228	0.636691		SBMO	7.72015	0.855072
WT	4.4508	0.640288		SBMO	7.75629	0.859903
WT	4.50668	0.643885		SBMO	7.95359	0.864734
WT	4.56185	0.647482		SBMO	7.98516	0.869565
WT	4.57335	0.651079		SBMO	8.75106	0.874396
WT	4.5998	0.654676		SBMO	8.79156	0.879227
WT	4.6393	0.658273		SBMO	8.8533	0.884058
WT	4.72454	0.661871		SBMO	9.03974	0.888889
WT	4.74843	0.665468		SBMO	9.446	0.89372
WT	4.88436	0.669065		SBMO	9.45717	0.898551
WT	4.88522	0.672662		SBMO	9.79853	0.903382
WT	4.93233	0.676259		SBMO	10.0385	0.908213
WT	4.96324	0.679856		SBMO	10.586	0.913043
WT	5.016	0.683453		SBMO	11.8145	0.917874
WT	5.0595	0.68705		SBMO	11.9886	0.922705
WT	5.11769	0.690647		SBMO	13.0695	0.927536
WT	5.21781	0.694245		SBMO	14.2597	0.932367
WT	5.29272	0.697842		SBMO	15.7377	0.937198
WT	5.37314	0.701439		SBMO	16.6537	0.942029
WT	5.41697	0.705036		SBMO	16.7711	0.94686
WT	5.46605	0.708633		SBMO	17.0119	0.951691
WT	5.47789	0.71223		SBMO	17.1661	0.956522
WT	5.51114	0.715827		SBMO	17.6337	0.961353
WT	5.65101	0.719424		SBMO	17.8101	0.966184
WT	5.70323	0.723022		SBMO	18.0702	0.971014
WT	5.71032	0.726619		SBMO	18.8369	0.975845
WT	5.74655	0.730216		SBMO	23.0169	0.980676
WT	5.92804	0.733813		SBMO	24.1745	0.985507
WT	5.93924	0.73741		SBMO	28.3533	0.990338
WT	6.02138	0.741007		SBMO	28.8826	0.995169
WT	6.08133	0.744604		SBMO	256.935	1
WT	6.15347	0.748201
WT	6.17444	0.751799
WT	6.19799	0.755396
WT	6.32132	0.758993
WT	6.33517	0.76259
WT	6.33706	0.766187
WT	6.42636	0.769784
WT	6.55882	0.773381
WT	6.59153	0.776978
WT	6.69469	0.780576
WT	6.71151	0.784173
WT	6.81051	0.78777
WT	6.84093	0.791367
WT	7.04157	0.794964
WT	7.49274	0.798561
WT	7.58161	0.802158
WT	7.62225	0.805755
WT	7.62511	0.809353
WT	7.84312	0.81295
WT	7.96505	0.816547
WT	8.14196	0.820144
WT	8.26488	0.823741
WT	8.44601	0.827338
WT	8.48339	0.830935
WT	8.51444	0.834532
WT	8.55404	0.838129
WT	8.5858	0.841727
WT	8.6685	0.845324
WT	9.02877	0.848921
WT	9.03022	0.852518
WT	9.21662	0.856115
WT	9.41984	0.859712
WT	9.56969	0.863309
WT	10.0459	0.866906
WT	10.4882	0.870504
WT	10.8024	0.874101
WT	10.9223	0.877698
WT	11.1486	0.881295
WT	11.2295	0.884892
WT	11.6087	0.888489
WT	12.3905	0.892086
WT	12.4612	0.895683
WT	12.5446	0.899281
WT	14.273	0.902878
WT	14.2976	0.906475
WT	15.5211	0.910072
WT	15.9303	0.913669
WT	18.701	0.917266
WT	20.0243	0.920863
WT	20.8833	0.92446
WT	22.5958	0.928058
WT	23.7189	0.931655
WT	23.7793	0.935252
WT	24.3334	0.938849
WT	25.2294	0.942446
WT	25.2295	0.946043
WT	25.8019	0.94964
WT	26.5592	0.953237
WT	28.3149	0.956835
WT	29.496	0.960432
WT	30.0869	0.964029
WT	32.0052	0.967626
WT	34.7301	0.971223
WT	35.8709	0.97482
