# Supplementary material for: Gjd2b-mediated gap junctions promote glutamatergic synapse formation and dendritic elaboration in Purkinje neurons
Source: eLife. 2021 Aug 4;10:e68124. doi: 10.7554/eLife.68124 (PMC8382294; doi:10.7554/eLife.68124)
Supplement: Figure 2—source data 1. [file elife-68124-fig2-data1.xlsx]

## Sheet: Results_WT
Image #	Area	Mean
1	1938.82	270.532
2	1938.82	408.297
3	1938.82	352.681
4	1938.82	317.233
5	1938.82	367.595
6	1938.82	442.763
7	1938.82	394.222
8	1938.82	309.882
9	1938.82	318.17
10	1938.82	291.33
11	1938.82	368.011
12	1938.82	414.897
13	1938.82	436.365
14	1938.82	329.99
15	1938.82	389.907
16	1938.82	290.889
17	1938.82	423.933
18	1938.82	317.497
19	1938.82	290.844
20	1938.82	318.311
21	1938.82	422.067
22	1938.82	239.212
23	1938.82	408.97
24	1938.82	307.865
25	1938.82	289.027
26	1938.82	265.607

## Sheet: Results_gjd2bMut
Image#	Area	Mean
27	1938.82	262.997
28	1938.82	171.03
29	1938.82	266.74
30	1938.82	222.091
31	1938.82	179.849
32	1938.82	185.404
33	1938.82	326.342
34	1938.82	287.442
35	1938.82	236.915
36	1938.82	223.805
37	1938.82	180.713
38	1938.82	144.485
39	1938.82	319.693
40	1938.82	349.225
41	1938.82	187.462
42	1938.82	221.69
43	1938.82	447.647
44	1938.82	334.539
45	1938.82	385.883
46	1938.82	208.554
47	1938.82	294.968
48	1938.82	214.17
49	1938.82	361.073
50	1938.82	288.33
51	1938.82	332.403
52	1938.82	250.649
53	1938.82	225.568
54	1938.82	200.533
55	1938.82	222.04
56	1938.82	222.443

## Sheet: Sheet1
Image#	Area	Mean	Norm.Int	Genotype
1	1938.82	270.532	0.904963	wt
2	1938.82	408.297	1.3658	wt
3	1938.82	352.681	1.17976	wt
4	1938.82	317.233	1.06118	wt
5	1938.82	367.595	1.22965	wt
6	1938.82	442.763	1.4811	wt
7	1938.82	394.222	1.31872	wt
8	1938.82	309.882	1.03659	wt
9	1938.82	318.17	1.06432	wt
10	1938.82	291.33	0.974535	wt
11	1938.82	368.011	1.23104	wt
12	1938.82	414.897	1.38788	wt
13	1938.82	436.365	1.4597	wt
14	1938.82	329.99	1.10386	wt
15	1938.82	389.907	1.30429	wt
16	1938.82	290.889	0.97306	wt
17	1938.82	423.933	1.41811	wt
18	1938.82	317.497	1.06207	wt
19	1938.82	290.844	0.97291	wt
20	1938.82	318.311	1.06479	wt
21	1938.82	422.067	1.41187	wt
22	1938.82	239.212	0.800194	wt
23	1938.82	408.97	1.36806	wt
24	1938.82	307.865	1.02985	wt
25	1938.82	289.027	0.966831	wt
26	1938.82	265.607	0.888489	wt
27	1938.82	262.997	0.879758	mut
28	1938.82	171.03	0.572117	mut
29	1938.82	266.74	0.892279	mut
30	1938.82	222.091	0.742922	mut
31	1938.82	179.849	0.601617	mut
32	1938.82	185.404	0.6202	mut
33	1938.82	326.342	1.09165	mut
34	1938.82	287.442	0.961529	mut
35	1938.82	236.915	0.79251	mut
36	1938.82	223.805	0.748656	mut
37	1938.82	180.713	0.604508	mut
38	1938.82	144.485	0.48332	mut
39	1938.82	319.693	1.06941	mut
40	1938.82	349.225	1.1682	mut
41	1938.82	187.462	0.627084	mut
42	1938.82	221.69	0.741581	mut
43	1938.82	447.647	1.49744	mut
44	1938.82	334.539	1.11907	mut
45	1938.82	385.883	1.29083	mut
46	1938.82	208.554	0.697639	mut
47	1938.82	294.968	0.986705	mut
48	1938.82	214.17	0.716425	mut
49	1938.82	361.073	1.20783	mut
50	1938.82	288.33	0.9645	mut
51	1938.82	332.403	1.11193	mut
52	1938.82	250.649	0.838452	mut
53	1938.82	225.568	0.754553	mut
54	1938.82	200.533	0.670808	mut
55	1938.82	222.04	0.742752	mut
56	1938.82	222.443	0.7441	mut
		298.943
