# Supplementary material for: Gjd2b-mediated gap junctions promote glutamatergic synapse formation and dendritic elaboration in Purkinje neurons
Source: eLife. 2021 Aug 4;10:e68124. doi: 10.7554/eLife.68124 (PMC8382294; doi:10.7554/eLife.68124)
Supplement: Figure 3—source data 1. [file elife-68124-fig3-data1.xlsx]

## Sheet: iei
wt_IEI(ms)	cf	mut_IEI(ms)	cf
98.1954	0.00943396	123.25	0.012987
102.648	0.0188679	1186.15	0.025974
139.547	0.0283019	1299.95	0.038961
236.656	0.0377358	1639.55	0.0519481
267.351	0.0471698	1702.55	0.0649351
466.102	0.0566038	3640.64	0.0779221
503.051	0.0660377	3749.75	0.0909091
794.551	0.0754717	4501.89	0.103896
799.453	0.0849057	4675.95	0.116883
931.453	0.0943396	4831.55	0.12987
1014.35	0.103774	5491.95	0.142857
1195.85	0.113208	7099.25	0.155844
1328.03	0.122642	7633.86	0.168831
1384.3	0.132075	7669.59	0.181818
1583.55	0.141509	8099.34	0.194805
1920.3	0.150943	8294.59	0.207792
2075.15	0.160377	8344.95	0.220779
2194.5	0.169811	8496.89	0.233766
2274.16	0.179245	9009.38	0.246753
2348.66	0.188679	9413.8	0.25974
2465.65	0.198113	9554.84	0.272727
3673.05	0.207547	9886.84	0.285714
3838.1	0.216981	10433.5	0.298701
4289.5	0.226415	11202.6	0.311688
4500.05	0.235849	12044.2	0.324675
4935.1	0.245283	12095.3	0.337662
5164.45	0.254717	12628.3	0.350649
5355.05	0.264151	13292.8	0.363636
5510.2	0.273585	13547.6	0.376623
5731.8	0.283019	14189	0.38961
5807.16	0.292453	16178	0.402597
5897.89	0.301887	17167	0.415584
5965.5	0.311321	18132.8	0.428571
6215.25	0.320755	18231.1	0.441558
7410.95	0.330189	18470.2	0.454545
7513.38	0.339623	18658.2	0.467532
8274.84	0.349057	18700.2	0.480519
9023.8	0.358491	18738.4	0.493506
9099.4	0.367925	22238.8	0.506494
9494.85	0.377358	22602.3	0.519481
9566.59	0.386792	22634.8	0.532468
9812.25	0.396226	23926.3	0.545455
9986.35	0.40566	24904.2	0.558442
11709.2	0.415094	25587	0.571429
11992.9	0.424528	26279.7	0.584416
12345.2	0.433962	27010	0.597403
12775.7	0.443396	27865.2	0.61039
12943	0.45283	28519.5	0.623377
13926	0.462264	28808.1	0.636364
14319.1	0.471698	30106.8	0.649351
14319.8	0.481132	36914	0.662338
14859.7	0.490566	39029.2	0.675325
15280	0.5	41746.7	0.688312
15317.8	0.509434	44043.9	0.701299
15898.5	0.518868	46270	0.714286
15964.7	0.528302	47469.3	0.727273
16659.9	0.537736	48381.8	0.74026
16891.1	0.54717	48413.1	0.753247
17426.4	0.556604	49330.5	0.766234
17429	0.566038	55825.8	0.779221
21179.6	0.575472	56850	0.792208
22463.3	0.584906	60516.4	0.805195
24232.4	0.59434	69682.9	0.818182
24701.4	0.603774	69931.1	0.831169
24741.7	0.613208	78395.7	0.844156
25211.3	0.622642	79020.6	0.857143
25298.1	0.632075	81177.4	0.87013
26159	0.641509	82386.9	0.883117
26434	0.650943	85278.3	0.896104
27165.7	0.660377	85988.7	0.909091
27201.5	0.669811	95118.9	0.922078
27475.5	0.679245	101892	0.935065
31469.2	0.688679	104498	0.948052
31574.5	0.698113	105128	0.961039
31590.5	0.707547	116806	0.974026
32599.5	0.716981	123098	0.987013
32715.3	0.726415	177408	1
33012.8	0.735849
34361.6	0.745283
35810.8	0.754717
36666.8	0.764151
37367.5	0.773585
37972.6	0.783019
39196.5	0.792453
39342.1	0.801887
40512.8	0.811321
40519.6	0.820755
41587.9	0.830189
43183.6	0.839623
44908.3	0.849057
45486	0.858491
45589.9	0.867925
48200	0.877358
48678.6	0.886792
48940.6	0.896226
49373.7	0.90566
51324	0.915094
54577.5	0.924528
55266.3	0.933962
55735.2	0.943396
56362	0.95283
69956.5	0.962264
84346	0.971698
121826	0.981132
131865	0.990566
166147	1

## Sheet: amp
wt_peak amplitude(pA)	cf	mut_peak amplitude(pA)	cf
-4.09671	0.00833333	-3.48398	0.0104167
-4.31322	0.0166667	-4.07037	0.0208333
-4.40669	0.025	-4.13428	0.03125
-4.40962	0.0333333	-4.78383	0.0416667
-4.44395	0.0416667	-4.92389	0.0520833
-4.54944	0.05	-5.07062	0.0625
-4.56196	0.0583333	-5.18849	0.0729167
-4.59301	0.0666667	-5.39543	0.0833333
-4.66676	0.075	-5.4118	0.09375
-4.74706	0.0833333	-5.67096	0.104167
-4.78183	0.0916667	-5.71249	0.114583
-4.86856	0.1	-5.83091	0.125
-5.03667	0.108333	-5.85869	0.135417
-5.07027	0.116667	-6.12176	0.145833
-5.10974	0.125	-6.60362	0.15625
-5.15257	0.133333	-6.62815	0.166667
-5.28537	0.141667	-6.69192	0.177083
-5.32961	0.15	-6.72222	0.1875
-5.37366	0.158333	-6.8364	0.197917
-5.43499	0.166667	-6.95973	0.208333
-5.65491	0.175	-7.04863	0.21875
-5.69492	0.183333	-7.17167	0.229167
-5.72676	0.191667	-7.37946	0.239583
-5.75067	0.2	-7.56703	0.25
-5.93585	0.208333	-7.62702	0.260417
-5.96417	0.216667	-8.06153	0.270833
-5.98511	0.225	-9.08791	0.28125
-6.04716	0.233333	-9.29599	0.291667
-6.05323	0.241667	-9.30843	0.302083
-6.10814	0.25	-9.31022	0.3125
-6.11861	0.258333	-9.43651	0.322917
-6.1537	0.266667	-9.66378	0.333333
-6.29262	0.275	-9.71171	0.34375
-6.31777	0.283333	-9.87093	0.354167
-6.3346	0.291667	-10.0058	0.364583
-6.57018	0.3	-10.4509	0.375
-6.60164	0.308333	-10.8246	0.385417
-6.62037	0.316667	-11.1889	0.395833
-6.62946	0.325	-11.642	0.40625
-6.76258	0.333333	-11.8215	0.416667
-6.78941	0.341667	-11.9847	0.427083
-6.9261	0.35	-12.6862	0.4375
-6.93568	0.358333	-13.0405	0.447917
-7.0734	0.366667	-13.0974	0.458333
-7.21557	0.375	-13.5265	0.46875
-7.21565	0.383333	-15.5625	0.479167
-7.29703	0.391667	-15.6357	0.489583
-7.29972	0.4	-15.6917	0.5
-7.32068	0.408333	-16.4875	0.510417
-7.86469	0.416667	-17.0842	0.520833
-7.87068	0.425	-17.2523	0.53125
-7.96852	0.433333	-17.4129	0.541667
-8.03943	0.441667	-17.5604	0.552083
-8.10486	0.45	-17.5861	0.5625
-8.15145	0.458333	-17.649	0.572917
-8.20142	0.466667	-17.8364	0.583333
-8.32074	0.475	-18.3412	0.59375
-8.34216	0.483333	-18.6411	0.604167
-8.4219	0.491667	-19.0713	0.614583
-8.43999	0.5	-19.164	0.625
-8.44399	0.508333	-19.7981	0.635417
-8.45618	0.516667	-19.9544	0.645833
-8.6763	0.525	-20.1078	0.65625
-8.74305	0.533333	-20.5229	0.666667
-8.79143	0.541667	-21.2262	0.677083
-8.80367	0.55	-21.2743	0.6875
-9.0369	0.558333	-21.5981	0.697917
-9.0538	0.566667	-22.4141	0.708333
-9.27606	0.575	-22.4791	0.71875
-9.39084	0.583333	-23.607	0.729167
-9.41434	0.591667	-23.8061	0.739583
-9.52298	0.6	-24.0952	0.75
-9.9297	0.608333	-25.0818	0.760417
-9.98202	0.616667	-25.1394	0.770833
-10.0096	0.625	-25.7461	0.78125
-10.2288	0.633333	-26.0313	0.791667
-10.5239	0.641667	-26.8382	0.802083
-10.5694	0.65	-27.1406	0.8125
-10.5793	0.658333	-27.6394	0.822917
-10.6037	0.666667	-27.8796	0.833333
-10.6319	0.675	-30.8077	0.84375
-10.7182	0.683333	-31.3492	0.854167
-10.7646	0.691667	-32.3705	0.864583
-11.0886	0.7	-34.2102	0.875
-11.2419	0.708333	-34.8234	0.885417
-11.3798	0.716667	-35.6436	0.895833
-11.4165	0.725	-37.5423	0.90625
-11.4893	0.733333	-42.4189	0.916667
-11.5284	0.741667	-43.1398	0.927083
-11.6941	0.75	-44.7583	0.9375
-11.803	0.758333	-45.2494	0.947917
-11.8217	0.766667	-45.9123	0.958333
-12.0815	0.775	-46.127	0.96875
-12.3263	0.783333	-47.9696	0.979167
-12.3765	0.791667	-55.0636	0.989583
-12.6557	0.8	-64.0574	1
-12.6695	0.808333
-12.7941	0.816667
-13.1827	0.825
-13.5169	0.833333
-14.1924	0.841667
-14.5114	0.85
-15.2225	0.858333
-15.4302	0.866667
-16.2694	0.875
-16.2824	0.883333
-16.3071	0.891667
-16.3434	0.9
-16.4196	0.908333
-17.0994	0.916667
-18.3132	0.925
-20.7174	0.933333
-21.4065	0.941667
-21.9613	0.95
-22.1333	0.958333
-23.0854	0.966667
-23.9698	0.975
-24.5564	0.983333
-27.3609	0.991667
-38.7235	1

## Sheet: rise10-90
wt_rise time 10% to 90%(ms)	cf	mut_rise time 10% to 90%(ms)	cf
0.113608	0.00840336	0.116413	0.0106383
0.139022	0.0168067	0.136471	0.0212766
0.198244	0.0252101	0.161009	0.0319149
0.218172	0.0336134	0.161046	0.0425532
0.220771	0.0420168	0.162617	0.0531915
0.242114	0.0504202	0.162941	0.0638298
0.245827	0.0588235	0.171526	0.0744681
0.251373	0.0672269	0.18289	0.0851064
0.252084	0.0756303	0.186203	0.0957447
0.256283	0.0840336	0.187659	0.106383
0.280792	0.092437	0.188101	0.117021
0.295214	0.10084	0.188403	0.12766
0.297515	0.109244	0.19207	0.138298
0.30378	0.117647	0.201737	0.148936
0.3208	0.12605	0.203817	0.159574
0.321751	0.134454	0.207388	0.170213
0.334048	0.142857	0.20788	0.180851
0.341113	0.151261	0.208021	0.191489
0.341544	0.159664	0.208317	0.202128
0.371056	0.168067	0.208469	0.212766
0.383619	0.176471	0.208733	0.223404
0.391755	0.184874	0.209219	0.234043
0.400047	0.193277	0.213983	0.244681
0.418261	0.201681	0.214925	0.255319
0.4494	0.210084	0.215413	0.265957
0.454114	0.218487	0.215498	0.276596
0.477695	0.226891	0.218177	0.287234
0.4852	0.235294	0.218396	0.297872
0.521767	0.243697	0.223953	0.308511
0.541591	0.252101	0.224012	0.319149
0.55625	0.260504	0.225668	0.329787
0.58699	0.268908	0.226563	0.340426
0.590966	0.277311	0.228033	0.351064
0.595308	0.285714	0.230375	0.361702
0.600295	0.294118	0.235909	0.37234
0.604299	0.302521	0.238661	0.382979
0.604306	0.310924	0.250663	0.393617
0.619083	0.319328	0.255285	0.404255
0.620348	0.327731	0.258898	0.414894
0.633418	0.336134	0.263512	0.425532
0.63562	0.344538	0.270623	0.43617
0.63976	0.352941	0.277425	0.446809
0.639816	0.361345	0.299333	0.457447
0.655642	0.369748	0.300378	0.468085
0.663683	0.378151	0.303408	0.478723
0.667616	0.386555	0.307841	0.489362
0.681431	0.394958	0.310338	0.5
0.684858	0.403361	0.323645	0.510638
0.686678	0.411765	0.326829	0.521277
0.687306	0.420168	0.330118	0.531915
0.690634	0.428571	0.356797	0.542553
0.697975	0.436975	0.35915	0.553191
0.726986	0.445378	0.362205	0.56383
0.732498	0.453782	0.365219	0.574468
0.759071	0.462185	0.365862	0.585106
0.768556	0.470588	0.366076	0.595745
0.772306	0.478992	0.366673	0.606383
0.774822	0.487395	0.407387	0.617021
0.779075	0.495798	0.418358	0.62766
0.787816	0.504202	0.423603	0.638298
0.788076	0.512605	0.443358	0.648936
0.796687	0.521008	0.450669	0.659574
0.812583	0.529412	0.464842	0.670213
0.827086	0.537815	0.488792	0.680851
0.828869	0.546218	0.526009	0.691489
0.830041	0.554622	0.542838	0.702128
0.862527	0.563025	0.548156	0.712766
0.863709	0.571429	0.5644	0.723404
0.86621	0.579832	0.573275	0.734043
0.868976	0.588235	0.614512	0.744681
0.889105	0.596639	0.633889	0.755319
0.89618	0.605042	0.642497	0.765957
0.909802	0.613445	0.652062	0.776596
0.910789	0.621849	0.672096	0.787234
0.932244	0.630252	0.713547	0.797872
0.95074	0.638655	0.714228	0.808511
0.953334	0.647059	0.714335	0.819149
0.955142	0.655462	0.720258	0.829787
0.990144	0.663866	0.720983	0.840426
0.991992	0.672269	0.722389	0.851064
0.995446	0.680672	0.762192	0.861702
1.0019	0.689076	0.816583	0.87234
1.00339	0.697479	0.827475	0.882979
1.00546	0.705882	0.857923	0.893617
1.01022	0.714286	0.865571	0.904255
1.02732	0.722689	0.869984	0.914894
1.06617	0.731092	0.885737	0.925532
1.07995	0.739496	0.897347	0.93617
1.09002	0.747899	0.909682	0.946809
1.09469	0.756303	0.993805	0.957447
1.10574	0.764706	1.03388	0.968085
1.10686	0.773109	1.04388	0.978723
1.12177	0.781513	1.17916	0.989362
1.12226	0.789916	1.37346	1
1.14477	0.798319
1.14655	0.806723
1.14682	0.815126
1.15147	0.823529
1.17733	0.831933
1.17957	0.840336
1.18632	0.848739
1.19208	0.857143
1.2006	0.865546
1.22952	0.87395
1.2449	0.882353
1.24723	0.890756
1.27648	0.89916
1.28495	0.907563
1.2852	0.915966
1.36582	0.92437
1.41904	0.932773
1.46776	0.941176
1.4944	0.94958
1.71774	0.957983
1.74543	0.966387
1.78814	0.97479
1.80119	0.983193
2.20131	0.991597
2.28663	1

## Sheet: decay tau
wt_decay tau(ms)	cf	mut_decay tau(ms)	cf
0.552171	0.00833333	0.295897	0.0104167
0.554661	0.0166667	0.576327	0.0208333
0.589736	0.025	0.577646	0.03125
0.687744	0.0333333	0.668068	0.0416667
0.710996	0.0416667	0.669501	0.0520833
0.773148	0.05	0.762888	0.0625
0.837469	0.0583333	0.89274	0.0729167
0.837583	0.0666667	0.905791	0.0833333
1.08571	0.075	0.989835	0.09375
1.13096	0.0833333	0.998292	0.104167
1.24055	0.0916667	1.05214	0.114583
1.48028	0.1	1.09948	0.125
1.62491	0.108333	1.10555	0.135417
1.64568	0.116667	1.11117	0.145833
1.73293	0.125	1.11378	0.15625
1.75087	0.133333	1.15349	0.166667
1.78821	0.141667	1.18687	0.177083
1.81145	0.15	1.21849	0.1875
1.83006	0.158333	1.25996	0.197917
1.86871	0.166667	1.2815	0.208333
1.86903	0.175	1.32645	0.21875
1.92292	0.183333	1.35192	0.229167
1.95099	0.191667	1.35793	0.239583
2.00215	0.2	1.36022	0.25
2.04161	0.208333	1.36338	0.260417
2.05042	0.216667	1.3778	0.270833
2.05762	0.225	1.44461	0.28125
2.12271	0.233333	1.51177	0.291667
2.12899	0.241667	1.52955	0.302083
2.13988	0.25	1.54488	0.3125
2.14114	0.258333	1.58668	0.322917
2.23278	0.266667	1.69256	0.333333
2.24743	0.275	1.7121	0.34375
2.26687	0.283333	1.72848	0.354167
2.34011	0.291667	1.7368	0.364583
2.35133	0.3	1.74976	0.375
2.4506	0.308333	1.75009	0.385417
2.47532	0.316667	1.78305	0.395833
2.51951	0.325	1.7884	0.40625
2.51961	0.333333	1.7932	0.416667
2.5357	0.341667	1.80641	0.427083
2.54624	0.35	1.8223	0.4375
2.57513	0.358333	1.83632	0.447917
2.63148	0.366667	1.85954	0.458333
2.6703	0.375	1.90584	0.46875
2.73749	0.383333	1.90836	0.479167
2.76567	0.391667	1.95565	0.489583
2.77273	0.4	1.97982	0.5
2.83677	0.408333	1.99117	0.510417
2.84956	0.416667	2.02882	0.520833
2.85115	0.425	2.03605	0.53125
2.85808	0.433333	2.08024	0.541667
3.00776	0.441667	2.1163	0.552083
3.21396	0.45	2.13124	0.5625
3.2178	0.458333	2.13752	0.572917
3.24809	0.466667	2.19629	0.583333
3.29693	0.475	2.2263	0.59375
3.2986	0.483333	2.26478	0.604167
3.33543	0.491667	2.27351	0.614583
3.35562	0.5	2.27713	0.625
3.4848	0.508333	2.30953	0.635417
3.49973	0.516667	2.3448	0.645833
3.50454	0.525	2.38235	0.65625
3.5661	0.533333	2.38547	0.666667
3.6161	0.541667	2.42493	0.677083
3.63608	0.55	2.49702	0.6875
3.7013	0.558333	2.50493	0.697917
3.97177	0.566667	2.51578	0.708333
3.97628	0.575	2.53109	0.71875
3.99472	0.583333	2.56317	0.729167
4.00754	0.591667	2.59479	0.739583
4.01614	0.6	2.62845	0.75
4.05353	0.608333	2.64137	0.760417
4.05886	0.616667	2.64847	0.770833
4.06511	0.625	2.66487	0.78125
4.20043	0.633333	2.74137	0.791667
4.22028	0.641667	2.74531	0.802083
4.32049	0.65	2.75024	0.8125
4.36119	0.658333	2.83982	0.822917
4.40295	0.666667	2.90979	0.833333
4.4826	0.675	3.00468	0.84375
4.49604	0.683333	3.0508	0.854167
4.50503	0.691667	3.14769	0.864583
4.53605	0.7	3.15455	0.875
4.54645	0.708333	3.19868	0.885417
4.56509	0.716667	3.28809	0.895833
4.57927	0.725	3.34457	0.90625
4.60173	0.733333	3.67586	0.916667
4.68301	0.741667	3.91528	0.927083
4.76823	0.75	3.94956	0.9375
4.77765	0.758333	3.97948	0.947917
4.79893	0.766667	4.07551	0.958333
4.93091	0.775	4.25891	0.96875
4.96658	0.783333	4.38765	0.979167
5.01099	0.791667	4.48841	0.989583
5.13537	0.8	4.71325	1
5.24186	0.808333
5.49895	0.816667
5.5725	0.825
5.60381	0.833333
5.69386	0.841667
5.7713	0.85
5.98194	0.858333
6.21637	0.866667
6.30332	0.875
6.62481	0.883333
6.63591	0.891667
6.68579	0.9
7.03148	0.908333
7.37804	0.916667
7.47334	0.925
7.8937	0.933333
7.92749	0.941667
8.05229	0.95
8.05704	0.958333
8.18924	0.966667
8.47807	0.975
8.72704	0.983333
8.8136	0.991667
10.3132	1

## Sheet: Rin
K Gluconate	RinGohm		CsGluconate	Rin Gohm
WT	MUTANT		WT	MUTANT
0.947945	0.757117		1.93208	9.52696
1.19112	1.20988		3.36731	1.86367
0.842299	1.46866		1.85774	1.65178
0.857985	1.04221		6.40547	8.70206
6.77082	1.46163		1.62623	4.7342
0.848579	0.72646		1.31551	5.74134
0.989637	1.81308		1.41153	2.34866
0.677123	1.3204		1.25258	5.90929
1.29158	1.01763		1.74	4.20611
1.50837	1.37186		1.2099	1.79806
1.53809	1.38431		2.815
0.99952	1.60354		1.82
1.37279	1.34094
1.55772	2.61071
1.54842	2.75465
3.3784	1.27304
1.39671	1.82625
1.54985	2.88511
3.95097	0.988949
1.09225	1.17513
1.89305	1.56623
	2.9725
