# Supplementary material for: Gjd2b-mediated gap junctions promote glutamatergic synapse formation and dendritic elaboration in Purkinje neurons
Source: eLife. 2021 Aug 4;10:e68124. doi: 10.7554/eLife.68124 (PMC8382294; doi:10.7554/eLife.68124)
Supplement: Figure 4—source data 1. [file elife-68124-fig4-data1.xlsx]

## Sheet: Indian wild type
Indian wild type, 7dpf						Inter stimulus intervals (ms)
N=7, n=9
	30	35	40	50	70	100	120	150	200	500	550	600	800	1000
Cell ID							paired Pulse Ratios
Wild Type04-07-2020F1C1	0.903206	0.883397	0.909865	0.902469	0.918185	0.902204	0.892291	0.909797	0.886319	0.949146	0.938969	0.943246	0.992565	0.980344
Wild Type06-07-2020F3C1	0.851675	0.829105	0.916838	0.887795	0.912594	0.875051	0.916762	0.899834	0.894525	0.880292	0.914282	0.90054	0.890332	0.829819
Wild Type06-07-2020F3C2	0.809306	0.863014	0.477332	0.506805	0.481044	0.616266	0.6447	0.888874	0.879559	0.894349	0.896466	0.876736	0.820844	0.850302
Wild Type06-07-2020F3C3	0.873758	0.896213	0.886262	0.889074	0.950797	0.95267	0.881805	0.83014	0.81982	0.926263	0.923281	0.955812	0.98465	0.969876
Wild Type06-07-2020F4C1	0.889567	0.869677	0.870668	0.779768	0.679413	0.938413	1.13396	1.00589	0.890737	0.854359	0.898035	0.924328	1.03802	0.941945
Wild Type24-07-2020F1C1	0.849841	0.886349	0.652609	0.643598	0.866173	0.850681	0.866203	0.876542	0.886309	0.921001	0.929119	0.914729	0.930598	0.948508
Wild Type24-07-2020F2C1	0.73316	0.761164	0.786182	0.808451	0.769717	0.815541	0.81052	0.789261	0.882898	0.830978	0.863732	0.884883	0.836889	0.886567
Wild Type24-07-2020F5C1	0.929504	0.980022	0.953215	0.980894	0.970689	0.98351	0.98847	0.975817	0.990706	0.982384	0.98633	0.983402	0.972982	0.982725
Wild Type25-07-2020F2C1	0.909384	0.899699	0.924059	0.94095	0.965386	0.993173	1.00033	0.972808	1.01191	0.991306	1.0023	0.989011	0.990503	0.983328
mean	0.861045	0.874293	0.81967	0.815534	0.834889	0.880834	0.903894	0.90544	0.904754	0.914453	0.928057	0.930298	0.939709	0.930379
Std dev (STDEV)	0.0602295	0.058653	0.157944	0.153079	0.164502	0.115811	0.135782	0.0706296	0.0593492	0.0548377	0.0436995	0.0405907	0.075322	0.0596939

## Sheet: Cx 35--mutant
Cx 35-/-mutant, 7dpf						Inter stimulus intervals (ms)
N=7, n=9
	30	35	40	50	70	100	120	150	200	500	550	600	800	1000
Cell ID							paired Pulse Ratios
Mutant01-07-2020F3C1	0.876303	0.96576	0.937483	0.9633	0.942491	0.988452	0.961888	0.996067	0.965862	0.947915	0.919228	0.947578	0.919711	0.891125
Mutant01-07-2020F3C2	1.12618	1.05626	1.06493	1.05451	1.09952	1.10679	1.0131	1.0292	0.995483	0.981038	0.88344	0.97018	0.953172	0.907845
Mutant02-07-2020F2C1	0.874443	0.862118	0.884399	0.92924	0.906662	0.90504	0.862964	0.891513	0.84649	0.736664	0.639241	0.686526	0.958235	0.862453
Mutant02-07-2020F2C2	0.886415	0.871534	0.851595	0.827747	0.829088	0.770454	0.863476	0.765913	0.901433	0.872524	0.884767	0.919492	0.914205	0.987733
Mutant02-07-2020F3C1	0.748544	0.89303	0.869519	0.899999	0.944584	0.788279	1.08482	0.824126	0.901114	0.920995	0.982061	0.858724	0.974644	0.943034
Mutant02-07-2020F5C1	0.948804	0.902592	0.933502	0.910362	0.937749	0.902238	0.91111	0.876608	0.82072	0.821851	0.927315	0.911979	0.926235	0.918583
Mutant13-07-2020F1C2	0.820587	0.866099	0.880988	0.89976	0.908921	0.892644	0.904655	0.916884	0.881409	0.880077	0.857008	0.854368	0.894773	0.935212
Mutant13-07-2020F2C2	0.766511	0.8406	0.828448	0.810292	0.881926	0.939113	0.890299	0.8505	0.835284	0.810861	0.798967	0.840674	0.806654	1.3366
Mutant13-07-2020F3C1	0.963678	1.05938	1.07543	0.958829	1.15071	1.13996	1.10648	1.16223	1.10609	0.958434	1.07592	1.01965	0.921215	0.81318
Mutant25-08-2020F1C1	0.839353	0.908018	0.757513	0.853975	0.94643	0.931704	0.951542	0.920044	0.970365	0.965402	0.956791	0.958167	1.00055	0.994088
Mutant25-08-2020F2C1	0.960275	1.05724	0.98842	0.98803	0.971963	1.02307	0.982395	0.978787	0.936524	0.948437	0.971793	0.982026	0.954233	0.968222
Mutant25-08-2020F2C3	1.04538	0.985829	0.971356	1.00092	0.97248	0.965389	0.976999	0.991531	0.974089	0.966038	0.940435	0.991428	0.932044	1.04915
mean	0.904706	0.939039	0.920298	0.924748	0.95771	0.946094	0.959144	0.933617	0.927905	0.900853	0.90308	0.911733	0.929639	0.967269
Std dev (STDEV)	0.110469	0.0825673	0.0942764	0.0727863	0.088411	0.110361	0.0796342	0.105831	0.0809281	0.0772116	0.108399	0.0913159	0.0484265	0.132217

## Sheet: All ISIs
		PPR
	ISI(ms)	WT	MUTANT				WT STDEV		MUTANT STDEV
	30	0.861045	0.890163				0.0602295		0.114666
	35	0.874293	0.924153				0.058653		0.0835713
	40	0.81967	0.925143				0.157944		0.0893101
	50	0.815534	0.917116				0.153079		0.0732598
	70	0.834889	0.955739				0.164502		0.103319
	100	0.880834	0.936997				0.115811		0.12586
	120	0.903894	0.955421				0.135782		0.0926793
	150	0.90544	0.923671				0.0706296		0.120796
	200	0.904754	0.917098				0.0593492		0.0915025
	500	0.914453	0.881151				0.0548377		0.0801595
	550	0.928057	0.885327				0.0436995		0.121149
	600	0.930298	0.889908				0.0405907		0.0961699
	800	0.939709	0.918761				0.075322		0.0488519
	1000	0.930379	0.955085				0.0596939		0.151465

## Sheet: MorphantsvsCtrl
Treat	Group	Cell#	PPR	ISI				WT				SBMO
SBMO	2	1	0.64311	30		ISI	average	STDEV	count	sterr	average	STDEV	count	sterr
SBMO	2	1	0.663105	35		30	0.784543	0.12902	12	0.0372449	0.525528	0.191979	25	0.0383957
SBMO	2	1	0.621228	40		35	0.721341	0.172134	18	0.0405724	0.608682	0.190835	22	0.0406862
SBMO	2	1	0.768836	50		40	0.755003	0.236804	20	0.052951	0.623049	0.154458	24	0.0315286
SBMO	2	1	0.67502	70		50	0.726464	0.195648	19	0.0448847	0.723844	0.210777	23	0.04395
SBMO	2	1	0.70261	100		70	0.768408	0.187396	24	0.038252	0.696559	0.217535	21	0.0474701
SBMO	2	1	0.834468	120		100	0.819291	0.216366	17	0.0524765	0.653859	0.198764	23	0.0414451
SBMO	2	1	0.782253	150		120	0.854036	0.139111	20	0.0311061	0.769439	0.191475	20	0.0428152
SBMO	2	1	0.825991	200		150	0.930804	0.31851	18	0.0750735	0.762506	0.165433	22	0.0352704
SBMO	2	1	0.98156	500		200	0.926495	0.147015	18	0.0346518	0.836542	0.152833	22	0.0325842
SBMO	2	1	0.951445	550		500	1.02386	0.188551	9	0.0628504	1.0034	0.181919	23	0.0379328
SBMO	2	2	0.430372	30		550	1.04796	0.184121	11	0.0555145	1.03595	0.148176	19	0.033994
SBMO	2	2	0.508621	35
SBMO	2	2	0.521803	40
SBMO	2	2	0.620656	50
SBMO	2	2	0.406096	70
SBMO	2	2	0.526061	100
SBMO	2	2	0.627458	120
SBMO	2	2	0.653907	150
SBMO	2	2	0.813421	200
SBMO	2	2	1.02419	500
SBMO	2	2	1.00082	550
SBMO	2	3	0.322515	30
SBMO	2	3	0.604844	35
SBMO	2	3	0.684464	40
SBMO	2	3	0.675173	50
SBMO	2	3	0.897206	70
SBMO	2	3	0.610636	100
SBMO	2	3	0.773557	120
SBMO	2	3	0.840927	150
SBMO	2	3	0.78935	200
SBMO	2	3	0.970315	500
SBMO	2	3	1.00484	550
SBMO	2	4	0.533021	30
SBMO	2	4	0.648905	35
SBMO	2	4	0.611484	40
SBMO	2	4	0.747025	50
SBMO	2	4	0.717054	70
SBMO	2	4	0.699263	100
SBMO	2	4	0.663539	120
SBMO	2	4	0.778756	150
SBMO	2	4	0.896772	200
SBMO	2	4	0.989014	500
SBMO	2	4	1.12377	550
SBMO	2	5	0.698622	30
SBMO	2	5	0.636099	35
SBMO	2	5	0.675903	40
SBMO	2	5	0.802433	50
SBMO	2	5	0.805279	70
SBMO	2	5	0.731829	100
SBMO	2	5	1.00638	120
SBMO	2	5	0.742165	150
SBMO	2	5	0.841005	200
SBMO	2	5	1.05862	500
SBMO	2	5	1.06439	550
WT	1	6	0.516434	35
WT	1	6	0.60837	40
WT	1	6	0.591484	50
WT	1	6	0.676451	70
WT	1	6	0.599055	100
WT	1	6	0.809025	120
WT	1	7	0.614805	35
WT	1	7	0.825838	40
WT	1	7	0.858295	50
WT	1	7	0.900127	70
WT	1	7	0.979585	100
WT	1	7	0.872766	120
WT	1	7	1.14758	150
WT	1	7	0.960753	200
WT	1	7	0.962348	500
WT	1	7	1.07221	550
WT	1	8	0.687973	30
WT	1	8	0.762951	35
WT	1	8	0.770632	40
WT	1	8	0.679537	50
WT	1	8	0.570777	70
WT	1	8	0.756752	100
WT	1	8	0.796667	120
WT	1	8	0.764071	150
WT	1	8	0.732909	200
WT	1	8	1.09483	500
WT	1	8	1.24142	550
WT	1	9	0.869898	30
WT	1	9	0.856026	35
WT	1	9	0.729542	40
WT	1	9	0.742165	50
WT	1	9	0.816561	70
WT	1	9	0.893746	100
WT	1	9	0.924642	120
WT	1	9	0.9372	150
WT	1	9	0.959436	200
WT	1	9	0.974203	500
WT	1	9	1.02389	550
WT	1	10	0.810586	30
WT	1	10	0.794108	35
WT	1	10	0.861909	40
WT	1	10	0.822525	50
WT	1	10	0.889448	70
WT	1	10	0.84117	100
WT	1	10	0.880967	120
WT	1	10	0.918994	150
WT	1	10	0.981517	200
WT	1	10	1.02571	500
WT	1	10	0.980158	550
