# Supplementary material for: Gjd2b-mediated gap junctions promote glutamatergic synapse formation and dendritic elaboration in Purkinje neurons
Source: eLife. 2021 Aug 4;10:e68124. doi: 10.7554/eLife.68124 (PMC8382294; doi:10.7554/eLife.68124)
Supplement: Figure 5—source data 1. [file elife-68124-fig5-data1.xlsx]

## Sheet: Synapse Density
	Synapse Density
WT	CF	Mutant	CF
0	0.00156986	0	0.00181818
1.08225	0.00313972	1.08225	0.00363636
2.1645	0.00470958	1.08225	0.00545455
3.11526	0.00627943	1.08225	0.00727273
3.24675	0.00784929	2.1645	0.00909091
3.24675	0.00941915	2.1645	0.0109091
3.24675	0.010989	2.1645	0.0127273
3.24675	0.0125589	2.1645	0.0145455
3.24675	0.0141287	2.1645	0.0163636
4.329	0.0156986	2.1645	0.0181818
4.329	0.0172684	2.1645	0.02
4.329	0.0188383	2.1645	0.0218182
4.329	0.0204082	2.1645	0.0236364
4.329	0.021978	2.1645	0.0254545
4.329	0.0235479	2.1645	0.0272727
4.329	0.0251177	2.1645	0.0290909
4.329	0.0266876	2.1645	0.0309091
4.329	0.0282575	2.1645	0.0327273
4.329	0.0298273	2.96033	0.0345455
5.41126	0.0313972	3.24675	0.0363636
5.41126	0.032967	3.24675	0.0381818
5.41126	0.0345369	3.24675	0.04
5.41126	0.0361068	3.24675	0.0418182
5.41126	0.0376766	3.24675	0.0436364
5.41126	0.0392465	3.24675	0.0454545
5.41126	0.0408163	3.24675	0.0472727
5.41126	0.0423862	3.24675	0.0490909
5.41126	0.043956	3.24675	0.0509091
5.41126	0.0455259	3.24675	0.0527273
5.41126	0.0470958	3.24675	0.0545455
5.41126	0.0486656	3.24675	0.0563636
5.41126	0.0502355	3.24675	0.0581818
5.41126	0.0518053	3.24675	0.06
5.41126	0.0533752	3.24675	0.0618182
6.41026	0.0549451	3.24675	0.0636364
6.49351	0.0565149	3.33333	0.0654545
6.49351	0.0580848	3.47222	0.0672727
6.49351	0.0596546	3.84615	0.0690909
6.49351	0.0612245	4.14594	0.0709091
6.49351	0.0627943	4.329	0.0727273
6.49351	0.0643642	4.329	0.0745455
6.49351	0.0659341	4.329	0.0763636
6.49351	0.0675039	4.329	0.0781818
6.49351	0.0690738	4.329	0.08
6.49351	0.0706436	4.329	0.0818182
6.49351	0.0722135	4.329	0.0836364
6.49351	0.0737834	4.329	0.0854545
6.49351	0.0753532	4.329	0.0872727
6.49351	0.0769231	4.329	0.0890909
6.49351	0.0784929	4.329	0.0909091
6.94444	0.0800628	4.329	0.0927273
7.57576	0.0816327	4.329	0.0945455
7.57576	0.0832025	4.329	0.0963636
7.57576	0.0847724	4.329	0.0981818
7.57576	0.0863422	4.329	0.1
7.57576	0.0879121	4.329	0.101818
7.57576	0.0894819	4.329	0.103636
7.57576	0.0910518	4.329	0.105455
7.57576	0.0926217	4.329	0.107273
7.57576	0.0941915	4.329	0.109091
7.57576	0.0957614	4.329	0.110909
7.57576	0.0973312	4.5045	0.112727
7.57576	0.0989011	4.6729	0.114545
7.57576	0.100471	4.80769	0.116364
7.57576	0.102041	4.90918	0.118182
7.57576	0.103611	5.41126	0.12
7.57576	0.105181	5.41126	0.121818
7.57576	0.10675	5.41126	0.123636
7.57576	0.10832	5.41126	0.125455
7.57576	0.10989	5.41126	0.127273
7.57576	0.11146	5.41126	0.129091
7.57576	0.11303	5.41126	0.130909
7.57576	0.1146	5.41126	0.132727
7.57576	0.11617	5.41126	0.134545
7.57576	0.117739	5.41126	0.136364
7.57576	0.119309	5.41126	0.138182
7.57576	0.120879	5.41126	0.14
7.57576	0.122449	5.41126	0.141818
7.57576	0.124019	5.41126	0.143636
7.8125	0.125589	5.41126	0.145455
7.91766	0.127159	5.41126	0.147273
8.65801	0.128728	5.41126	0.149091
8.65801	0.130298	5.41126	0.150909
8.65801	0.131868	5.41126	0.152727
8.65801	0.133438	5.41126	0.154545
8.65801	0.135008	5.41126	0.156364
8.65801	0.136578	5.41126	0.158182
8.65801	0.138148	5.55556	0.16
8.65801	0.139717	5.66893	0.161818
8.65801	0.141287	6.21891	0.163636
8.65801	0.142857	6.49351	0.165455
8.65801	0.144427	6.49351	0.167273
8.65801	0.145997	6.49351	0.169091
8.65801	0.147567	6.49351	0.170909
8.65801	0.149137	6.49351	0.172727
8.65801	0.150706	6.49351	0.174545
8.65801	0.152276	6.49351	0.176364
8.65801	0.153846	6.49351	0.178182
8.65801	0.155416	6.49351	0.18
8.65801	0.156986	6.49351	0.181818
8.65801	0.158556	6.49351	0.183636
8.65801	0.160126	6.49351	0.185455
8.65801	0.161695	6.49351	0.187273
8.65801	0.163265	6.49351	0.189091
8.65801	0.164835	6.49351	0.190909
8.65801	0.166405	6.49351	0.192727
8.65801	0.167975	6.49351	0.194545
8.65801	0.169545	6.49351	0.196364
8.65801	0.171115	6.49351	0.198182
8.65801	0.172684	6.49351	0.2
8.65801	0.174254	6.49351	0.201818
8.65801	0.175824	6.49351	0.203636
8.65801	0.177394	6.49351	0.205455
8.65801	0.178964	6.49351	0.207273
8.87199	0.180534	6.49351	0.209091
9.09091	0.182104	6.49351	0.210909
9.52381	0.183673	6.49351	0.212727
9.74026	0.185243	6.49351	0.214545
9.74026	0.186813	6.49351	0.216364
9.74026	0.188383	6.49351	0.218182
9.74026	0.189953	6.49351	0.22
9.74026	0.191523	7.23066	0.221818
9.74026	0.193093	7.28332	0.223636
9.74026	0.194662	7.57576	0.225455
9.74026	0.196232	7.57576	0.227273
9.74026	0.197802	7.57576	0.229091
9.74026	0.199372	7.57576	0.230909
9.74026	0.200942	7.57576	0.232727
9.74026	0.202512	7.57576	0.234545
9.74026	0.204082	7.57576	0.236364
9.74026	0.205651	7.57576	0.238182
9.74026	0.207221	7.57576	0.24
9.74026	0.208791	7.57576	0.241818
9.74026	0.210361	7.57576	0.243636
9.74026	0.211931	7.57576	0.245455
9.74026	0.213501	7.57576	0.247273
9.74026	0.215071	7.57576	0.249091
9.74026	0.216641	7.57576	0.250909
9.74026	0.21821	7.57576	0.252727
9.74026	0.21978	7.57576	0.254545
9.74026	0.22135	7.57576	0.256364
9.74026	0.22292	7.57576	0.258182
9.74026	0.22449	7.57576	0.26
9.74026	0.22606	7.57576	0.261818
9.74026	0.22763	7.57576	0.263636
9.74026	0.229199	7.57576	0.265455
9.74026	0.230769	7.57576	0.267273
9.74026	0.232339	7.57576	0.269091
9.74026	0.233909	7.57576	0.270909
9.74026	0.235479	7.57576	0.272727
9.74026	0.237049	7.57576	0.274545
9.74026	0.238619	7.57576	0.276364
9.74026	0.240188	7.57576	0.278182
9.74026	0.241758	7.57576	0.28
9.74026	0.243328	7.57576	0.281818
9.74026	0.244898	7.57576	0.283636
9.74026	0.246468	7.57576	0.285455
9.74026	0.248038	7.57576	0.287273
9.74026	0.249608	7.57576	0.289091
9.74026	0.251177	7.57576	0.290909
9.74026	0.252747	7.57576	0.292727
9.74026	0.254317	7.75194	0.294545
9.97151	0.255887	8.27423	0.296364
10.4167	0.257457	8.65801	0.298182
10.5116	0.259027	8.65801	0.3
10.8225	0.260597	8.65801	0.301818
10.8225	0.262166	8.65801	0.303636
10.8225	0.263736	8.65801	0.305455
10.8225	0.265306	8.65801	0.307273
10.8225	0.266876	8.65801	0.309091
10.8225	0.268446	8.65801	0.310909
10.8225	0.270016	8.65801	0.312727
10.8225	0.271586	8.65801	0.314545
10.8225	0.273155	8.65801	0.316364
10.8225	0.274725	8.65801	0.318182
10.8225	0.276295	8.65801	0.32
10.8225	0.277865	8.65801	0.321818
10.8225	0.279435	8.65801	0.323636
10.8225	0.281005	8.65801	0.325455
10.8225	0.282575	8.65801	0.327273
10.8225	0.284144	8.65801	0.329091
10.8225	0.285714	8.65801	0.330909
10.8225	0.287284	8.65801	0.332727
10.8225	0.288854	8.65801	0.334545
10.8225	0.290424	8.65801	0.336364
10.8225	0.291994	8.65801	0.338182
10.8225	0.293564	8.65801	0.34
10.8225	0.295133	8.65801	0.341818
10.8225	0.296703	8.65801	0.343636
10.8225	0.298273	8.65801	0.345455
10.8225	0.299843	8.65801	0.347273
10.8225	0.301413	8.65801	0.349091
10.8225	0.302983	8.65801	0.350909
10.8225	0.304553	8.65801	0.352727
10.8225	0.306122	8.65801	0.354545
10.8225	0.307692	8.65801	0.356364
10.8225	0.309262	8.65801	0.358182
10.8225	0.310832	8.65801	0.36
10.8225	0.312402	8.65801	0.361818
10.8225	0.313972	8.65801	0.363636
11.0294	0.315542	8.65801	0.365455
11.194	0.317111	8.65801	0.367273
11.3293	0.318681	8.65801	0.369091
11.5512	0.320251	8.65801	0.370909
11.8203	0.321821	8.65801	0.372727
11.9048	0.323391	8.65801	0.374545
11.9048	0.324961	8.65801	0.376364
11.9048	0.326531	8.65801	0.378182
11.9048	0.3281	8.65801	0.38
11.9048	0.32967	8.65801	0.381818
11.9048	0.33124	8.65801	0.383636
11.9048	0.33281	8.97436	0.385455
11.9048	0.33438	9.25926	0.387273
11.9048	0.33595	9.32401	0.389091
11.9048	0.33752	9.4086	0.390909
11.9048	0.339089	9.74026	0.392727
11.9048	0.340659	9.74026	0.394545
11.9048	0.342229	9.74026	0.396364
11.9048	0.343799	9.74026	0.398182
11.9048	0.345369	9.74026	0.4
11.9048	0.346939	9.74026	0.401818
11.9048	0.348509	9.74026	0.403636
11.9048	0.350078	9.74026	0.405455
11.9048	0.351648	9.74026	0.407273
11.9048	0.353218	9.74026	0.409091
11.9048	0.354788	9.74026	0.410909
11.9048	0.356358	9.74026	0.412727
11.9048	0.357928	9.74026	0.414545
11.9048	0.359498	9.74026	0.416364
11.9048	0.361068	9.74026	0.418182
11.9048	0.362637	9.74026	0.42
11.9048	0.364207	9.74026	0.421818
11.9048	0.365777	9.74026	0.423636
11.9048	0.367347	9.74026	0.425455
11.9048	0.368917	9.74026	0.427273
11.9048	0.370487	9.74026	0.429091
11.9048	0.372057	9.74026	0.430909
11.9048	0.373626	9.74026	0.432727
11.9048	0.375196	9.74026	0.434545
11.9048	0.376766	9.74026	0.436364
11.9048	0.378336	9.74026	0.438182
11.9048	0.379906	9.74026	0.44
11.9048	0.381476	9.74026	0.441818
11.9048	0.383046	9.74026	0.443636
11.9048	0.384615	9.74026	0.445455
11.9048	0.386185	9.74026	0.447273
11.9048	0.387755	9.74026	0.449091
11.9048	0.389325	9.74026	0.450909
11.9048	0.390895	9.74026	0.452727
11.9048	0.392465	9.74026	0.454545
11.9048	0.394035	9.74026	0.456364
11.9048	0.395604	9.74026	0.458182
11.9048	0.397174	9.74026	0.46
11.9048	0.398744	9.74026	0.461818
11.9048	0.400314	9.74026	0.463636
11.9048	0.401884	9.74026	0.465455
11.9048	0.403454	9.74026	0.467273
11.9048	0.405024	9.74026	0.469091
11.9048	0.406593	9.74026	0.470909
11.9048	0.408163	9.74026	0.472727
11.9048	0.409733	9.74026	0.474545
11.9048	0.411303	9.74026	0.476364
11.9048	0.412873	9.74026	0.478182
11.9048	0.414443	10.3093	0.48
11.9048	0.416013	10.6061	0.481818
12.0968	0.417582	10.7143	0.483636
12.1212	0.419152	10.7914	0.485455
12.2324	0.420722	10.8225	0.487273
12.4113	0.422292	10.8225	0.489091
12.987	0.423862	10.8225	0.490909
12.987	0.425432	10.8225	0.492727
12.987	0.427002	10.8225	0.494545
12.987	0.428571	10.8225	0.496364
12.987	0.430141	10.8225	0.498182
12.987	0.431711	10.8225	0.5
12.987	0.433281	10.8225	0.501818
12.987	0.434851	10.8225	0.503636
12.987	0.436421	10.8225	0.505455
12.987	0.437991	10.8225	0.507273
12.987	0.43956	10.8225	0.509091
12.987	0.44113	10.8225	0.510909
12.987	0.4427	10.8225	0.512727
12.987	0.44427	10.8225	0.514545
12.987	0.44584	10.8225	0.516364
12.987	0.44741	10.8225	0.518182
12.987	0.44898	10.8225	0.52
12.987	0.450549	10.8225	0.521818
12.987	0.452119	10.8225	0.523636
12.987	0.453689	10.8225	0.525455
12.987	0.455259	10.8225	0.527273
12.987	0.456829	10.8225	0.529091
12.987	0.458399	10.8225	0.530909
12.987	0.459969	10.8225	0.532727
12.987	0.461538	10.8225	0.534545
12.987	0.463108	10.8225	0.536364
12.987	0.464678	10.8225	0.538182
12.987	0.466248	10.8225	0.54
12.987	0.467818	10.8225	0.541818
12.987	0.469388	10.8225	0.543636
12.987	0.470958	10.8225	0.545455
12.987	0.472527	10.8225	0.547273
12.987	0.474097	10.8225	0.549091
12.987	0.475667	10.8225	0.550909
12.987	0.477237	10.8225	0.552727
12.987	0.478807	10.8225	0.554545
12.987	0.480377	10.8225	0.556364
12.987	0.481947	11.1111	0.558182
12.987	0.483516	11.9048	0.56
12.987	0.485086	11.9048	0.561818
12.987	0.486656	11.9048	0.563636
12.987	0.488226	11.9048	0.565455
12.987	0.489796	11.9048	0.567273
12.987	0.491366	11.9048	0.569091
12.987	0.492936	11.9048	0.570909
12.987	0.494505	11.9048	0.572727
12.987	0.496075	11.9048	0.574545
12.987	0.497645	11.9048	0.576364
13.1894	0.499215	11.9048	0.578182
13.285	0.500785	11.9048	0.58
13.382	0.502355	11.9048	0.581818
13.5135	0.503925	11.9048	0.583636
13.5501	0.505495	11.9048	0.585455
13.7931	0.507064	11.9048	0.587273
14.0593	0.508634	11.9048	0.589091
14.0693	0.510204	11.9048	0.590909
14.0693	0.511774	11.9048	0.592727
14.0693	0.513344	11.9048	0.594545
14.0693	0.514914	11.9048	0.596364
14.0693	0.516484	11.9048	0.598182
14.0693	0.518053	11.9048	0.6
14.0693	0.519623	11.9048	0.601818
14.0693	0.521193	11.9048	0.603636
14.0693	0.522763	11.9048	0.605455
14.0693	0.524333	11.9048	0.607273
14.0693	0.525903	11.9048	0.609091
14.0693	0.527473	11.9048	0.610909
14.0693	0.529042	11.9048	0.612727
14.0693	0.530612	11.9048	0.614545
14.0693	0.532182	11.9048	0.616364
14.0693	0.533752	11.9048	0.618182
14.0693	0.535322	11.9048	0.62
14.0693	0.536892	11.9048	0.621818
14.0693	0.538462	11.9048	0.623636
14.0693	0.540031	11.9048	0.625455
14.0693	0.541601	11.9048	0.627273
14.0693	0.543171	11.9048	0.629091
14.0693	0.544741	11.9048	0.630909
14.0693	0.546311	11.9048	0.632727
14.0693	0.547881	11.9048	0.634545
14.0693	0.549451	11.9048	0.636364
14.0693	0.55102	11.9048	0.638182
14.0693	0.55259	12.2011	0.64
14.0693	0.55416	12.8205	0.641818
14.0693	0.55573	12.987	0.643636
14.0693	0.5573	12.987	0.645455
14.0693	0.55887	12.987	0.647273
14.0693	0.56044	12.987	0.649091
14.0693	0.562009	12.987	0.650909
14.0693	0.563579	12.987	0.652727
14.0693	0.565149	12.987	0.654545
14.0693	0.566719	12.987	0.656364
14.0693	0.568289	12.987	0.658182
14.0693	0.569859	12.987	0.66
14.0693	0.571429	12.987	0.661818
14.0693	0.572998	12.987	0.663636
14.0693	0.574568	12.987	0.665455
14.0693	0.576138	12.987	0.667273
14.0693	0.577708	12.987	0.669091
14.0693	0.579278	12.987	0.670909
14.0693	0.580848	12.987	0.672727
14.1844	0.582418	12.987	0.674545
14.245	0.583987	12.987	0.676364
14.7849	0.585557	12.987	0.678182
15.0463	0.587127	12.987	0.68
15.1515	0.588697	12.987	0.681818
15.1515	0.590267	12.987	0.683636
15.1515	0.591837	12.987	0.685455
15.1515	0.593407	12.987	0.687273
15.1515	0.594976	12.987	0.689091
15.1515	0.596546	12.987	0.690909
15.1515	0.598116	12.987	0.692727
15.1515	0.599686	12.987	0.694545
15.1515	0.601256	12.987	0.696364
15.1515	0.602826	12.987	0.698182
15.1515	0.604396	12.987	0.7
15.1515	0.605965	12.987	0.701818
15.1515	0.607535	12.987	0.703636
15.1515	0.609105	12.987	0.705455
15.1515	0.610675	12.987	0.707273
15.1515	0.612245	12.987	0.709091
15.1515	0.613815	12.987	0.710909
15.1515	0.615385	12.987	0.712727
15.1515	0.616954	12.987	0.714545
15.1515	0.618524	12.987	0.716364
15.1515	0.620094	12.987	0.718182
15.1515	0.621664	12.987	0.72
15.1515	0.623234	12.987	0.721818
15.1515	0.624804	12.987	0.723636
15.1515	0.626374	12.987	0.725455
15.1515	0.627943	12.987	0.727273
15.1515	0.629513	12.987	0.729091
15.1515	0.631083	12.987	0.730909
15.1515	0.632653	12.987	0.732727
15.1515	0.634223	13.2743	0.734545
15.1515	0.635793	14.0056	0.736364
15.1515	0.637363	14.0693	0.738182
15.1515	0.638932	14.0693	0.74
15.1515	0.640502	14.0693	0.741818
15.1515	0.642072	14.0693	0.743636
15.1515	0.643642	14.0693	0.745455
15.1515	0.645212	14.0693	0.747273
15.1515	0.646782	14.0693	0.749091
15.1515	0.648352	14.0693	0.750909
15.1515	0.649922	14.0693	0.752727
15.1515	0.651491	14.0693	0.754545
15.4062	0.653061	14.0693	0.756364
15.625	0.654631	14.0693	0.758182
16.2338	0.656201	14.0693	0.76
16.2338	0.657771	14.0693	0.761818
16.2338	0.659341	14.0693	0.763636
16.2338	0.660911	14.0693	0.765455
16.2338	0.66248	14.0693	0.767273
16.2338	0.66405	14.0693	0.769091
16.2338	0.66562	14.0693	0.770909
16.2338	0.66719	14.0693	0.772727
16.2338	0.66876	14.0693	0.774545
16.2338	0.67033	14.0693	0.776364
16.2338	0.6719	14.0693	0.778182
16.2338	0.673469	14.0693	0.78
16.2338	0.675039	14.0693	0.781818
16.2338	0.676609	14.0693	0.783636
16.2338	0.678179	14.0693	0.785455
16.2338	0.679749	14.1509	0.787273
16.2338	0.681319	14.7849	0.789091
16.2338	0.682889	15.0463	0.790909
16.2338	0.684458	15.1515	0.792727
16.2338	0.686028	15.1515	0.794545
16.2338	0.687598	15.1515	0.796364
16.2338	0.689168	15.1515	0.798182
16.2338	0.690738	15.1515	0.8
16.2338	0.692308	15.1515	0.801818
16.2338	0.693878	15.1515	0.803636
16.2338	0.695447	15.1515	0.805455
16.2338	0.697017	15.1515	0.807273
16.2338	0.698587	15.1515	0.809091
16.2338	0.700157	15.1515	0.810909
16.2338	0.701727	15.1515	0.812727
16.2338	0.703297	15.1515	0.814545
16.2338	0.704867	15.1515	0.816364
16.2338	0.706436	15.1515	0.818182
16.2338	0.708006	15.1515	0.82
16.2338	0.709576	15.1515	0.821818
16.2338	0.711146	15.1515	0.823636
16.2338	0.712716	15.1515	0.825455
16.2338	0.714286	15.1515	0.827273
16.2338	0.715856	15.1515	0.829091
16.2338	0.717425	15.1515	0.830909
16.2338	0.718995	15.1515	0.832727
16.2338	0.720565	15.1515	0.834545
16.2338	0.722135	15.1515	0.836364
16.2338	0.723705	15.1515	0.838182
16.2338	0.725275	15.1515	0.84
16.317	0.726845	15.1515	0.841818
16.5485	0.728414	15.6617	0.843636
16.6667	0.729984	16.2338	0.845455
16.7959	0.731554	16.2338	0.847273
16.9492	0.733124	16.2338	0.849091
17.1569	0.734694	16.2338	0.850909
17.1958	0.736264	16.2338	0.852727
17.316	0.737834	16.2338	0.854545
17.316	0.739403	16.2338	0.856364
17.316	0.740973	16.2338	0.858182
17.316	0.742543	16.2338	0.86
17.316	0.744113	16.2338	0.861818
17.316	0.745683	16.2338	0.863636
17.316	0.747253	16.2338	0.865455
17.316	0.748823	16.2338	0.867273
17.316	0.750392	16.2338	0.869091
17.316	0.751962	16.2338	0.870909
17.316	0.753532	16.2338	0.872727
17.316	0.755102	16.2338	0.874545
17.316	0.756672	16.2338	0.876364
17.316	0.758242	16.2338	0.878182
17.316	0.759812	16.2338	0.88
17.316	0.761381	16.2338	0.881818
17.316	0.762951	16.2338	0.883636
17.316	0.764521	16.6667	0.885455
17.316	0.766091	17.069	0.887273
17.316	0.767661	17.316	0.889091
17.316	0.769231	17.316	0.890909
17.316	0.770801	17.316	0.892727
17.316	0.77237	17.316	0.894545
17.316	0.77394	17.316	0.896364
17.316	0.77551	17.316	0.898182
17.316	0.77708	17.316	0.9
17.316	0.77865	17.316	0.901818
17.316	0.78022	17.316	0.903636
17.316	0.78179	17.316	0.905455
17.316	0.783359	17.316	0.907273
17.316	0.784929	17.316	0.909091
17.316	0.786499	17.316	0.910909
17.316	0.788069	17.316	0.912727
17.316	0.789639	17.316	0.914545
17.316	0.791209	17.316	0.916364
17.316	0.792779	17.7305	0.918182
17.316	0.794349	18.3983	0.92
17.316	0.795918	18.3983	0.921818
17.316	0.797488	18.3983	0.923636
17.316	0.799058	18.3983	0.925455
17.316	0.800628	18.3983	0.927273
17.316	0.802198	18.3983	0.929091
17.316	0.803768	18.3983	0.930909
17.316	0.805338	18.3983	0.932727
17.316	0.806907	18.3983	0.934545
17.316	0.808477	19.084	0.936364
17.6768	0.810047	19.2308	0.938182
18.3983	0.811617	19.4805	0.94
18.3983	0.813187	19.4805	0.941818
18.3983	0.814757	19.4805	0.943636
18.3983	0.816327	19.4805	0.945455
18.3983	0.817896	19.4805	0.947273
18.3983	0.819466	19.4805	0.949091
18.3983	0.821036	19.4805	0.950909
18.3983	0.822606	19.4805	0.952727
18.3983	0.824176	19.8413	0.954545
18.3983	0.825746	20.202	0.956364
18.3983	0.827316	20.3252	0.958182
18.3983	0.828885	20.5628	0.96
18.3983	0.830455	20.5628	0.961818
18.3983	0.832025	20.5628	0.963636
18.3983	0.833595	20.5628	0.965455
18.3983	0.835165	20.5628	0.967273
18.3983	0.836735	20.5628	0.969091
18.3983	0.838305	20.5628	0.970909
18.3983	0.839874	20.5628	0.972727
18.3983	0.841444	21.645	0.974545
18.3983	0.843014	21.645	0.976364
18.3983	0.844584	21.8978	0.978182
18.3983	0.846154	22.7273	0.98
18.3983	0.847724	22.7273	0.981818
18.3983	0.849294	22.7273	0.983636
18.3983	0.850863	22.7273	0.985455
18.6567	0.852433	22.7273	0.987273
19.4805	0.854003	23.0496	0.989091
19.4805	0.855573	23.8095	0.990909
19.4805	0.857143	24.8918	0.992727
19.4805	0.858713	25.974	0.994545
19.4805	0.860283	25.974	0.996364
19.4805	0.861852	28.1385	0.998182
19.4805	0.863422	28.1385	1
19.4805	0.864992
19.4805	0.866562
19.4805	0.868132
19.4805	0.869702
19.4805	0.871272
19.4805	0.872841
19.4805	0.874411
19.4805	0.875981
19.4805	0.877551
19.9005	0.879121
20.4678	0.880691
20.5628	0.882261
20.5628	0.88383
20.5628	0.8854
20.5628	0.88697
20.5628	0.88854
20.5628	0.89011
20.5628	0.89168
20.5628	0.89325
20.5628	0.894819
20.5628	0.896389
20.5628	0.897959
20.5628	0.899529
20.5628	0.901099
20.5628	0.902669
20.5628	0.904239
20.5628	0.905808
20.8333	0.907378
20.9877	0.908948
21.6049	0.910518
21.645	0.912088
21.645	0.913658
21.645	0.915228
21.645	0.916797
21.645	0.918367
21.645	0.919937
21.645	0.921507
21.645	0.923077
21.645	0.924647
21.645	0.926217
21.645	0.927786
21.645	0.929356
21.645	0.930926
21.645	0.932496
21.645	0.934066
21.645	0.935636
21.645	0.937206
21.645	0.938776
22.7273	0.940345
22.7273	0.941915
22.7273	0.943485
22.7273	0.945055
22.7273	0.946625
22.7273	0.948195
22.7273	0.949765
22.7273	0.951334
22.7273	0.952904
22.7273	0.954474
22.7273	0.956044
22.7273	0.957614
23.8095	0.959184
23.8095	0.960754
23.8095	0.962323
24.8918	0.963893
24.8918	0.965463
24.8918	0.967033
24.8918	0.968603
24.8918	0.970173
24.8918	0.971743
24.8918	0.973312
24.8918	0.974882
25.2282	0.976452
25.974	0.978022
25.974	0.979592
25.974	0.981162
25.974	0.982732
25.974	0.984301
26.3158	0.985871
27.0563	0.987441
27.0563	0.989011
27.0563	0.990581
27.0563	0.992151
27.0563	0.993721
28.1385	0.99529
28.1385	0.99686
28.1385	0.99843
28.1385	1

## Sheet: maturity index
WT_Ac/At	CF	KO_Ac/At	CF
0.102719	0.00943396	0.0758294	0.00943396
0.116183	0.0188679	0.0833333	0.0188679
0.135238	0.0283019	0.110787	0.0283019
0.160265	0.0377358	0.117808	0.0377358
0.166118	0.0471698	0.126214	0.0471698
0.169231	0.0566038	0.131673	0.0566038
0.18254	0.0660377	0.153846	0.0660377
0.182979	0.0754717	0.175627	0.0754717
0.188605	0.0849057	0.186099	0.0849057
0.203262	0.0943396	0.190476	0.0943396
0.212928	0.103774	0.194656	0.103774
0.225882	0.113208	0.206478	0.113208
0.227586	0.122642	0.208163	0.122642
0.229572	0.132075	0.215768	0.132075
0.231481	0.141509	0.224138	0.141509
0.248252	0.150943	0.227129	0.150943
0.249169	0.160377	0.232919	0.160377
0.251082	0.169811	0.234097	0.169811
0.255591	0.179245	0.236264	0.179245
0.257092	0.188679	0.24359	0.188679
0.259259	0.198113	0.253731	0.198113
0.264901	0.207547	0.262181	0.207547
0.273585	0.216981	0.262411	0.216981
0.274074	0.226415	0.264368	0.226415
0.275762	0.235849	0.269565	0.235849
0.285714	0.245283	0.27027	0.245283
0.287671	0.254717	0.271739	0.254717
0.290541	0.264151	0.273764	0.264151
0.295858	0.273585	0.277174	0.273585
0.299559	0.283019	0.277228	0.283019
0.301724	0.292453	0.279503	0.292453
0.303468	0.301887	0.280156	0.301887
0.310606	0.311321	0.280374	0.311321
0.311284	0.320755	0.285714	0.320755
0.3125	0.330189	0.286713	0.330189
0.312977	0.339623	0.287395	0.339623
0.315789	0.349057	0.291572	0.349057
0.317647	0.358491	0.292308	0.358491
0.318841	0.367925	0.296154	0.367925
0.3225	0.377358	0.297872	0.377358
0.32634	0.386792	0.303136	0.386792
0.327869	0.396226	0.304348	0.396226
0.333333	0.40566	0.304636	0.40566
0.336134	0.415094	0.308017	0.415094
0.337143	0.424528	0.308642	0.424528
0.337705	0.433962	0.308943	0.433962
0.338109	0.443396	0.3125	0.443396
0.346491	0.45283	0.312676	0.45283
0.362007	0.462264	0.314904	0.462264
0.363248	0.471698	0.314917	0.471698
0.365714	0.481132	0.323034	0.481132
0.370968	0.490566	0.325991	0.490566
0.373585	0.5	0.326923	0.5
0.377273	0.509434	0.328294	0.509434
0.377682	0.518868	0.331707	0.518868
0.37833	0.528302	0.337079	0.528302
0.37931	0.537736	0.349624	0.537736
0.380392	0.54717	0.349794	0.54717
0.381944	0.556604	0.352	0.556604
0.384793	0.566038	0.356021	0.566038
0.385488	0.575472	0.356383	0.575472
0.390244	0.584906	0.361111	0.584906
0.390411	0.59434	0.362559	0.59434
0.394422	0.603774	0.365854	0.603774
0.396825	0.613208	0.368056	0.613208
0.40201	0.622642	0.379421	0.622642
0.403704	0.632075	0.379822	0.632075
0.405512	0.641509	0.38	0.641509
0.412371	0.650943	0.380471	0.650943
0.415663	0.660377	0.380783	0.660377
0.417293	0.669811	0.384365	0.669811
0.417323	0.679245	0.395349	0.679245
0.41791	0.688679	0.401993	0.688679
0.418182	0.698113	0.404858	0.698113
0.418605	0.707547	0.40625	0.707547
0.421918	0.716981	0.40836	0.716981
0.426554	0.726415	0.408488	0.726415
0.427835	0.735849	0.410042	0.735849
0.427835	0.745283	0.410127	0.745283
0.430588	0.754717	0.412088	0.754717
0.430939	0.764151	0.418803	0.764151
0.439394	0.773585	0.427928	0.773585
0.44843	0.783019	0.429185	0.783019
0.44878	0.792453	0.432624	0.792453
0.457071	0.801887	0.441379	0.801887
0.460606	0.811321	0.443864	0.811321
0.464935	0.820755	0.444444	0.820755
0.46729	0.830189	0.448808	0.830189
0.486352	0.839623	0.449102	0.839623
0.5	0.849057	0.453947	0.849057
0.5	0.858491	0.454545	0.858491
0.505133	0.867925	0.467662	0.867925
0.511628	0.877358	0.469466	0.877358
0.519737	0.886792	0.486486	0.886792
0.527326	0.896226	0.494253	0.896226
0.527363	0.90566	0.5	0.90566
0.531987	0.915094	0.5	0.915094
0.554865	0.924528	0.503876	0.924528
0.558065	0.933962	0.510345	0.933962
0.566879	0.943396	0.521008	0.943396
0.570342	0.95283	0.525066	0.95283
0.578947	0.962264	0.533333	0.962264
0.600543	0.971698	0.566102	0.971698
0.68541	0.981132	0.57037	0.981132
0.723235	0.990566	0.729084	0.990566
0.772257	1	0.846154	1
