# Supplementary material for: Gjd2b-mediated gap junctions promote glutamatergic synapse formation and dendritic elaboration in Purkinje neurons
Source: eLife. 2021 Aug 4;10:e68124. doi: 10.7554/eLife.68124 (PMC8382294; doi:10.7554/eLife.68124)
Supplement: Figure 6—source data 1. [file elife-68124-fig6-data1.xlsx]

## Sheet: Daily Imaging_TDBL
Time	TDBL	Genotype
5	146.759	WT
5	149.208	WT
5	107.438	WT
5	131.455	WT
5	88.6766	WT
5	118.295	WT
5	61.8226	WT
5	76.7304	WT
5	125.789	WT
5	83.2296	WT
5	108.632	WT
5	102.284	WT
5	91.4176	WT
5	67.8349	WT
5	82.4399	WT
5	155.769	WT
5	105.118	WT
5	215.106	WT
5	139.403	WT
5	220.311	WT
5	106.222	WT
5	157.3	WT
5	118.808	WT
5	85.5126	WT
5	110.96	WT
5	70.7033	WT
5	72.592	WT
5	78.7062	WT
5	140.905	WT
5	99.3175	WT
5	120.669	WT
5	139.986	WT
5	89.3681	WT
5	69.5796	WT
5	107.553	WT
5	82.814	WT
5	69.0579	WT
5	95.627	WT
5	70.4702	WT
5	169.186	WT
5	123.575	WT
5	122.857	WT
5	105.519	WT
5	137.918	WT
5	104.328	WT
5	105.492	WT
5	79.5306	WT
5	207.686	WT
5	132.04	WT
5	117.653	WT
5	103.652	WT
6	148.469	WT
6	94.8736	WT
6	72.9347	WT
6	50.5904	WT
6	92.5375	WT
6	124.894	WT
6	124.894	WT
6	166.7	WT
6	73.3251	WT
6	127.528	WT
6	112.891	WT
6	155.36	WT
6	155.342	WT
6	113.722	WT
6	121.512	WT
6	111.348	WT
6	304.073	WT
6	168.647	WT
6	150.563	WT
6	128.864	WT
6	130.451	WT
6	113.964	WT
6	219.904	WT
6	122.054	WT
6	118.811	WT
6	145.893	WT
6	210.582	WT
6	137.501	WT
6	133.467	WT
6	113.237	WT
6	129.973	WT
6	115.212	WT
6	98.4803	WT
6	92.4566	WT
6	148.604	WT
6	77.4054	WT
6	105.085	WT
6	192.436	WT
6	121.159	WT
6	119.434	WT
6	190.661	WT
6	94.7713	WT
6	293.83	WT
6	152.226	WT
6	112.282	WT
6	114.213	WT
6	220.991	WT
6	165.87	WT
6	128.634	WT
6	315.638	WT
6	153.828	WT
6	111.706	WT
6	165.009	WT
7	72.1725	WT
7	69.6654	WT
7	192.062	WT
7	138.996	WT
7	137.793	WT
7	75.33	WT
7	163.655	WT
7	118.07	WT
7	169.549	WT
7	203.669	WT
7	163.766	WT
7	206.329	WT
7	249.257	WT
7	281.433	WT
7	110.192	WT
7	121.868	WT
7	193.498	WT
7	211.248	WT
7	229.479	WT
7	144.084	WT
7	180.515	WT
7	161.943	WT
7	158.744	WT
7	165.632	WT
7	196.113	WT
7	116.442	WT
7	149.803	WT
7	213.061	WT
7	146.653	WT
7	113.214	WT
7	151.11	WT
7	173.816	WT
7	140.912	WT
7	209.603	WT
7	151.696	WT
7	99.8148	WT
7	107.276	WT
7	166.366	WT
7	239.068	WT
7	143.059	WT
7	140.368	WT
7	300.962	WT
7	246.683	WT
7	81.8328	WT
7	163.459	WT
8	124.153	WT
8	163.86	WT
8	120.409	WT
8	86.2324	WT
8	210.354	WT
8	84.1929	WT
8	99.1344	WT
8	159.608	WT
8	74.5671	WT
8	346.583	WT
8	188.804	WT
8	146.606	WT
8	185.198	WT
8	129.278	WT
8	62.9775	WT
8	87.7614	WT
8	138.607	WT
8	259.215	WT
8	173.539	WT
8	233.788	WT
8	140.144	WT
8	148.596	WT
8	113.548	WT
8	65.7797	WT
8	157.418	WT
8	215.838	WT
8	167.555	WT
8	277.941	WT
8	121.234	WT
8	150.094	WT
8	197.458	WT
8	208.736	WT
8	121.359	WT
8	175.238	WT
8	331.678	WT
8	318.774	WT
5	140.001	MUT
5	100.25	MUT
5	128.085	MUT
5	203.92	MUT
5	116.064	MUT
5	74.2553	MUT
5	172.318	MUT
5	156.193	MUT
5	144.588	MUT
5	84.9553	MUT
5	131.748	MUT
5	98.3938	MUT
5	120.468	MUT
5	270.218	MUT
5	21.4947	MUT
5	117.514	MUT
5	165.852	MUT
5	113.449	MUT
5	142.108	MUT
5	140.177	MUT
5	84.6011	MUT
5	78.5076	MUT
5	127.175	MUT
5	95.8768	MUT
5	109.877	MUT
5	63.9177	MUT
5	68.7516	MUT
6	140.644	MUT
6	89.9531	MUT
6	177.786	MUT
6	138.038	MUT
6	160.756	MUT
6	178.763	MUT
6	117.719	MUT
6	214.523	MUT
6	88.7028	MUT
6	131.052	MUT
6	105.555	MUT
6	147.007	MUT
6	117.316	MUT
6	142.455	MUT
6	176.217	MUT
6	198.132	MUT
6	138.413	MUT
6	91.7239	MUT
6	102.35	MUT
6	136.993	MUT
6	178.672	MUT
6	149.119	MUT
6	86.538	MUT
6	83.257	MUT
6	125.978	MUT
6	165.129	MUT
6	81.5677	MUT
6	93.2858	MUT
6	163.217	MUT
6	125.164	MUT
6	100.542	MUT
6	175.19	MUT
7	154.341	MUT
7	143.599	MUT
7	116.376	MUT
7	177.823	MUT
7	181.852	MUT
7	111.189	MUT
7	155.604	MUT
7	109.515	MUT
7	160.469	MUT
7	142.823	MUT
7	156.715	MUT
7	202.233	MUT
7	214.082	MUT
7	140.471	MUT
7	106.939	MUT
7	113.642	MUT
7	147.498	MUT
7	193.042	MUT
7	83.3138	MUT
7	230.883	MUT
7	132.429	MUT
7	53.5149	MUT
7	63.1555	MUT
7	94.1281	MUT
7	88.9156	MUT
7	126.053	MUT
7	83.4609	MUT
7	166.457	MUT
7	150.01	MUT
8	150.847	MUT
8	131.386	MUT
8	196.576	MUT
8	208.899	MUT
8	124.224	MUT
8	156.789	MUT
8	115.997	MUT
8	164.075	MUT
8	130.929	MUT
8	226.398	MUT
8	156.339	MUT
8	217.664	MUT
8	141.994	MUT
8	115.518	MUT
8	136.092	MUT
8	165.737	MUT
8	234.669	MUT
8	220.527	MUT
8	143.544	MUT
8	88.1016	MUT
8	77.861	MUT
8	97.5528	MUT
8	135.257	MUT
8	178.14	MUT
8	88.4243	MUT
8	126.884	MUT
8	125.675	MUT
8	129.224	MUT
8	100.854	MUT
8	109.373	MUT
8	88.0992	MUT
8	90.5805	MUT
8	202.652	MUT
8	174.855	MUT
8	122.714	MUT
8	91.7842	MUT
8	257.464	MUT
8	50.3788	MUT
8	161.408	MUT
8	144.306	MUT
8	95.9669	MUT
8	156.551	MUT
8	149.004	MUT
8	156.31	MUT

## Sheet: Daily Imaging_TDBN
Time	TDBN	Genotype
5	11	MUT
5	6	MUT
5	12	MUT
5	15	MUT
5	7	MUT
5	9	MUT
5	11	MUT
5	10	MUT
5	10	MUT
5	7	MUT
5	10	MUT
5	9	MUT
5	6	MUT
5	21	MUT
5	2	MUT
5	8	MUT
5	12	MUT
5	8	MUT
5	7	MUT
5	7	MUT
5	4	MUT
5	4	MUT
5	10	MUT
5	7	MUT
5	6	MUT
5	6	MUT
5	6	MUT
6	10	MUT
6	6	MUT
6	9	MUT
6	10	MUT
6	13	MUT
6	9	MUT
6	9	MUT
6	10	MUT
6	6	MUT
6	10	MUT
6	6	MUT
6	9	MUT
6	6	MUT
6	12	MUT
6	12	MUT
6	18	MUT
6	10	MUT
6	8	MUT
6	6	MUT
6	6	MUT
6	12	MUT
6	10	MUT
6	5	MUT
6	4	MUT
6	6	MUT
6	10	MUT
6	4	MUT
6	6	MUT
6	11	MUT
6	10	MUT
6	9	MUT
6	11	MUT
7	13	MUT
7	12	MUT
7	8	MUT
7	15	MUT
7	14	MUT
7	8	MUT
7	13	MUT
7	9	MUT
7	14	MUT
7	9	MUT
7	15	MUT
7	13	MUT
7	17	MUT
7	9	MUT
7	8	MUT
7	8	MUT
7	7	MUT
7	11	MUT
7	5	MUT
7	19	MUT
7	9	MUT
7	4	MUT
7	4	MUT
7	7	MUT
7	5	MUT
7	7	MUT
7	4	MUT
7	11	MUT
7	13	MUT
8	11	MUT
8	8	MUT
8	13	MUT
8	11	MUT
8	9	MUT
8	13	MUT
8	9	MUT
8	13	MUT
8	9	MUT
8	17	MUT
8	12	MUT
8	18	MUT
8	8	MUT
8	8	MUT
8	9	MUT
8	8	MUT
8	14	MUT
8	15	MUT
8	8	MUT
8	6	MUT
8	3	MUT
8	7	MUT
8	9	MUT
8	11	MUT
8	5	MUT
8	7	MUT
8	11	MUT
8	10	MUT
8	5	MUT
8	11	MUT
8	3	MUT
8	8	MUT
8	15	MUT
8	11	MUT
8	9	MUT
8	5	MUT
8	11	MUT
8	3	MUT
8	10	MUT
8	8	MUT
8	6	MUT
8	12	MUT
8	10	MUT
8	11	MUT
5	8	WT
5	11	WT
5	5	WT
5	7	WT
5	7	WT
5	4	WT
5	2	WT
5	2	WT
5	5	WT
5	5	WT
5	7	WT
5	8	WT
5	4	WT
5	4	WT
5	2	WT
5	5	WT
5	6	WT
5	11	WT
5	5	WT
5	13	WT
5	7	WT
5	7	WT
5	9	WT
5	8	WT
5	6	WT
5	3	WT
5	5	WT
5	5	WT
5	7	WT
5	7	WT
5	7	WT
5	7	WT
5	5	WT
5	2	WT
5	7	WT
5	10	WT
5	3	WT
5	4	WT
5	4	WT
5	9	WT
5	8	WT
5	6	WT
5	6	WT
5	10	WT
5	6	WT
5	7	WT
5	7	WT
5	11	WT
5	9	WT
5	8	WT
5	4	WT
6	8	WT
6	5	WT
6	6	WT
6	3	WT
6	11	WT
6	5	WT
6	5	WT
6	5	WT
6	3	WT
6	6	WT
6	5	WT
6	11	WT
6	9	WT
6	5	WT
6	6	WT
6	10	WT
6	14	WT
6	8	WT
6	10	WT
6	9	WT
6	8	WT
6	5	WT
6	12	WT
6	7	WT
6	6	WT
6	6	WT
6	8	WT
6	6	WT
6	8	WT
6	8	WT
6	6	WT
6	7	WT
6	7	WT
6	6	WT
6	9	WT
6	4	WT
6	7	WT
6	13	WT
6	5	WT
6	6	WT
6	12	WT
6	8	WT
6	13	WT
6	9	WT
6	5	WT
6	5	WT
6	11	WT
6	8	WT
6	8	WT
6	17	WT
6	7	WT
6	7	WT
6	8	WT
7	4	WT
7	5	WT
7	13	WT
7	8	WT
7	7	WT
7	3	WT
7	8	WT
7	5	WT
7	9	WT
7	11	WT
7	15	WT
7	11	WT
7	11	WT
7	16	WT
7	7	WT
7	6	WT
7	10	WT
7	13	WT
7	12	WT
7	6	WT
7	5	WT
7	10	WT
7	10	WT
7	10	WT
7	12	WT
7	8	WT
7	7	WT
7	15	WT
7	7	WT
7	5	WT
7	10	WT
7	8	WT
7	9	WT
7	10	WT
7	11	WT
7	5	WT
7	4	WT
7	12	WT
7	13	WT
7	7	WT
7	6	WT
7	17	WT
7	15	WT
7	3	WT
7	11	WT
8	7	WT
8	9	WT
8	5	WT
8	2	WT
8	15	WT
8	4	WT
8	3	WT
8	8	WT
8	4	WT
8	17	WT
8	10	WT
8	10	WT
8	12	WT
8	8	WT
8	3	WT
8	7	WT
8	5	WT
8	12	WT
8	9	WT
8	12	WT
8	7	WT
8	9	WT
8	6	WT
8	5	WT
8	12	WT
8	12	WT
8	7	WT
8	12	WT
8	4	WT
8	7	WT
8	11	WT
8	12	WT
8	9	WT
8	7	WT
8	16	WT
8	18	WT

## Sheet: Sholl Analysis
radius	n.id	intersections	genotype
1	1	1	WT
2	1	1	WT
3	1	1	WT
4	1	1	WT
5	1	1	WT
6	1	1	WT
7	1	1	WT
8	1	1	WT
9	1	1	WT
10	1	1	WT
11	1	3	WT
12	1	1	WT
13	1	1	WT
14	1	1	WT
15	1	1	WT
16	1	1	WT
17	1	1	WT
18	1	1	WT
19	1	1	WT
20	1	1	WT
21	1	1	WT
22	1	1	WT
23	1	1	WT
24	1	1	WT
25	1	1	WT
26	1	1	WT
27	1	1	WT
28	1	1	WT
29	1	1	WT
30	1	1	WT
31	1	1	WT
32	1	1	WT
33	1	3	WT
34	1	2	WT
35	1	5	WT
36	1	3	WT
37	1	2	WT
38	1	4	WT
39	1	3	WT
40	1	8	WT
41	1	4	WT
42	1	5	WT
43	1	5	WT
44	1	7	WT
45	1	10	WT
46	1	7	WT
47	1	5	WT
48	1	6	WT
49	1	6	WT
50	1	5	WT
51	1	4	WT
52	1	2	WT
53	1	1	WT
54	1	1	WT
55	1	1	WT
56	1	1	WT
57	1	2	WT
58	1	1	WT
59	1	1	WT
60	1	1	WT
1	2	1	WT
2	2	1	WT
3	2	1	WT
4	2	1	WT
5	2	1	WT
6	2	1	WT
7	2	1	WT
8	2	1	WT
9	2	1	WT
10	2	1	WT
11	2	1	WT
12	2	1	WT
13	2	1	WT
14	2	1	WT
15	2	1	WT
16	2	1	WT
17	2	3	WT
18	2	1	WT
19	2	1	WT
20	2	1	WT
21	2	1	WT
22	2	1	WT
23	2	1	WT
24	2	2	WT
25	2	2	WT
26	2	2	WT
27	2	2	WT
28	2	2	WT
29	2	5	WT
30	2	3	WT
31	2	3	WT
32	2	3	WT
33	2	4	WT
34	2	6	WT
35	2	5	WT
36	2	3	WT
37	2	3	WT
38	2	3	WT
39	2	2	WT
40	2	1	WT
41	2	1	WT
42	2	1	WT
43	2	1	WT
1	3	1	WT
2	3	1	WT
3	3	1	WT
4	3	1	WT
5	3	1	WT
6	3	1	WT
7	3	1	WT
8	3	1	WT
9	3	1	WT
10	3	1	WT
11	3	1	WT
12	3	1	WT
13	3	1	WT
14	3	1	WT
15	3	1	WT
16	3	1	WT
17	3	1	WT
18	3	1	WT
19	3	1	WT
20	3	1	WT
21	3	3	WT
22	3	1	WT
23	3	1	WT
24	3	1	WT
25	3	1	WT
26	3	1	WT
27	3	1	WT
28	3	1	WT
29	3	1	WT
30	3	1	WT
31	3	2	WT
32	3	3	WT
33	3	7	WT
34	3	7	WT
35	3	9	WT
36	3	3	WT
37	3	3	WT
38	3	5	WT
39	3	5	WT
40	3	4	WT
41	3	4	WT
42	3	4	WT
43	3	4	WT
44	3	4	WT
45	3	2	WT
46	3	2	WT
47	3	1	WT
48	3	5	WT
1	4	2	WT
2	4	1	WT
3	4	1	WT
4	4	1	WT
5	4	1	WT
6	4	1	WT
7	4	1	WT
8	4	1	WT
9	4	1	WT
10	4	1	WT
11	4	1	WT
12	4	1	WT
13	4	1	WT
14	4	1	WT
15	4	1	WT
16	4	1	WT
17	4	1	WT
18	4	2	WT
19	4	2	WT
20	4	3	WT
21	4	2	WT
22	4	3	WT
23	4	1	WT
24	4	1	WT
25	4	2	WT
26	4	2	WT
27	4	2	WT
28	4	6	WT
29	4	6	WT
30	4	7	WT
31	4	5	WT
32	4	4	WT
33	4	4	WT
34	4	6	WT
35	4	4	WT
36	4	2	WT
37	4	2	WT
38	4	3	WT
39	4	1	WT
1	5	1	WT
2	5	1	WT
3	5	1	WT
4	5	1	WT
5	5	1	WT
6	5	1	WT
7	5	3	WT
8	5	1	WT
9	5	1	WT
10	5	1	WT
11	5	1	WT
12	5	3	WT
13	5	1	WT
14	5	1	WT
15	5	1	WT
16	5	1	WT
17	5	1	WT
18	5	1	WT
19	5	1	WT
20	5	1	WT
21	5	2	WT
22	5	2	WT
23	5	5	WT
24	5	6	WT
25	5	5	WT
26	5	4	WT
27	5	3	WT
28	5	5	WT
29	5	3	WT
30	5	3	WT
31	5	5	WT
32	5	6	WT
33	5	2	WT
34	5	4	WT
35	5	4	WT
36	5	2	WT
37	5	3	WT
38	5	4	WT
39	5	2	WT
40	5	1	WT
1	6	1	WT
2	6	1	WT
3	6	1	WT
4	6	1	WT
5	6	1	WT
6	6	1	WT
7	6	3	WT
8	6	1	WT
9	6	1	WT
10	6	1	WT
11	6	1	WT
12	6	1	WT
13	6	1	WT
14	6	1	WT
15	6	1	WT
16	6	1	WT
17	6	1	WT
18	6	1	WT
19	6	1	WT
20	6	3	WT
21	6	1	WT
22	6	1	WT
23	6	1	WT
24	6	1	WT
25	6	2	WT
26	6	3	WT
27	6	1	WT
28	6	3	WT
29	6	6	WT
30	6	7	WT
31	6	8	WT
32	6	4	WT
33	6	4	WT
34	6	3	WT
35	6	4	WT
36	6	3	WT
37	6	4	WT
38	6	3	WT
39	6	2	WT
40	6	2	WT
1	7	2	WT
2	7	2	WT
3	7	2	WT
4	7	1	WT
5	7	1	WT
6	7	1	WT
7	7	1	WT
8	7	1	WT
9	7	1	WT
10	7	2	WT
11	7	2	WT
12	7	2	WT
13	7	4	WT
14	7	3	WT
15	7	3	WT
16	7	4	WT
17	7	10	WT
18	7	6	WT
19	7	13	WT
20	7	12	WT
21	7	9	WT
22	7	12	WT
23	7	8	WT
24	7	4	WT
25	7	2	WT
26	7	1	WT
27	7	1	WT
28	7	1	WT
1	8	1	WT
2	8	1	WT
3	8	3	WT
4	8	3	WT
5	8	4	WT
6	8	4	WT
7	8	8	WT
8	8	8	WT
9	8	6	WT
10	8	4	WT
11	8	3	WT
12	8	4	WT
13	8	4	WT
14	8	2	WT
15	8	2	WT
16	8	2	WT
17	8	2	WT
18	8	3	WT
19	8	5	WT
20	8	1	WT
21	8	1	WT
22	8	1	WT
1	9	1	WT
2	9	1	WT
3	9	1	WT
4	9	1	WT
5	9	1	WT
6	9	1	WT
7	9	1	WT
8	9	1	WT
9	9	1	WT
10	9	1	WT
11	9	1	WT
12	9	1	WT
13	9	1	WT
14	9	1	WT
15	9	1	WT
16	9	1	WT
17	9	1	WT
18	9	1	WT
19	9	1	WT
20	9	1	WT
21	9	3	WT
22	9	2	WT
23	9	2	WT
24	9	2	WT
25	9	2	WT
26	9	2	WT
27	9	3	WT
28	9	4	WT
29	9	4	WT
30	9	7	WT
31	9	5	WT
32	9	5	WT
33	9	5	WT
34	9	5	WT
35	9	6	WT
36	9	2	WT
37	9	1	WT
1	10	1	WT
2	10	1	WT
3	10	1	WT
4	10	1	WT
5	10	1	WT
6	10	1	WT
7	10	1	WT
8	10	1	WT
9	10	1	WT
10	10	3	WT
11	10	2	WT
12	10	2	WT
13	10	2	WT
14	10	2	WT
15	10	4	WT
16	10	2	WT
17	10	2	WT
18	10	2	WT
19	10	2	WT
20	10	2	WT
21	10	3	WT
22	10	3	WT
23	10	5	WT
24	10	2	WT
25	10	4	WT
26	10	2	WT
27	10	2	WT
28	10	1	WT
29	10	1	WT
1	11	1	WT
2	11	1	WT
3	11	1	WT
4	11	1	WT
5	11	1	WT
6	11	1	WT
7	11	1	WT
8	11	1	WT
9	11	1	WT
10	11	1	WT
11	11	1	WT
12	11	1	WT
13	11	1	WT
14	11	1	WT
15	11	1	WT
16	11	1	WT
17	11	1	WT
18	11	1	WT
19	11	1	WT
20	11	1	WT
21	11	1	WT
22	11	1	WT
23	11	1	WT
24	11	1	WT
25	11	1	WT
26	11	3	WT
27	11	4	WT
28	11	3	WT
29	11	5	WT
30	11	1	WT
31	11	3	WT
32	11	2	WT
33	11	2	WT
34	11	3	WT
35	11	6	WT
36	11	4	WT
37	11	7	WT
38	11	10	WT
39	11	6	WT
40	11	4	WT
41	11	3	WT
42	11	2	WT
43	11	2	WT
44	11	3	WT
1	12	1	WT
2	12	1	WT
3	12	1	WT
4	12	1	WT
5	12	1	WT
6	12	1	WT
7	12	1	WT
8	12	1	WT
9	12	1	WT
10	12	1	WT
11	12	1	WT
12	12	1	WT
13	12	1	WT
14	12	1	WT
15	12	1	WT
16	12	1	WT
17	12	1	WT
18	12	1	WT
19	12	1	WT
20	12	1	WT
21	12	2	WT
22	12	2	WT
23	12	4	WT
24	12	2	WT
25	12	2	WT
26	12	4	WT
27	12	4	WT
28	12	3	WT
29	12	6	WT
30	12	3	WT
31	12	3	WT
32	12	2	WT
33	12	2	WT
34	12	3	WT
35	12	3	WT
1	13	1	WT
2	13	3	WT
3	13	3	WT
4	13	2	WT
5	13	2	WT
6	13	2	WT
7	13	2	WT
8	13	4	WT
9	13	5	WT
10	13	6	WT
11	13	4	WT
12	13	7	WT
13	13	5	WT
14	13	6	WT
15	13	4	WT
16	13	4	WT
17	13	3	WT
18	13	3	WT
19	13	6	WT
20	13	8	WT
21	13	3	WT
22	13	2	WT
23	13	2	WT
24	13	4	WT
25	13	1	WT
1	14	1	WT
2	14	1	WT
3	14	1	WT
4	14	0	WT
5	14	0	WT
6	14	1	WT
7	14	1	WT
8	14	4	WT
9	14	3	WT
10	14	8	WT
11	14	9	WT
12	14	11	WT
13	14	7	WT
14	14	10	WT
15	14	11	WT
16	14	7	WT
17	14	5	WT
18	14	7	WT
19	14	11	WT
20	14	4	WT
21	14	4	WT
22	14	4	WT
23	14	3	WT
24	14	5	WT
25	14	1	WT
1	15	1	WT
2	15	1	WT
3	15	1	WT
4	15	2	WT
5	15	2	WT
6	15	2	WT
7	15	2	WT
8	15	2	WT
9	15	4	WT
10	15	4	WT
11	15	6	WT
12	15	4	WT
13	15	3	WT
14	15	4	WT
15	15	5	WT
16	15	8	WT
17	15	5	WT
18	15	6	WT
19	15	4	WT
20	15	9	WT
21	15	11	WT
22	15	2	WT
1	16	1	WT
2	16	1	WT
3	16	1	WT
4	16	1	WT
5	16	1	WT
6	16	3	WT
7	16	1	WT
8	16	1	WT
9	16	1	WT
10	16	1	WT
11	16	1	WT
12	16	1	WT
13	16	1	WT
14	16	1	WT
15	16	1	WT
16	16	1	WT
17	16	1	WT
18	16	3	WT
19	16	1	WT
20	16	1	WT
21	16	1	WT
22	16	1	WT
23	16	1	WT
24	16	1	WT
25	16	1	WT
26	16	1	WT
27	16	1	WT
28	16	1	WT
29	16	1	WT
30	16	1	WT
31	16	1	WT
32	16	2	WT
33	16	2	WT
34	16	2	WT
35	16	2	WT
36	16	4	WT
37	16	1	WT
38	16	1	WT
39	16	2	WT
40	16	4	WT
41	16	2	WT
42	16	2	WT
43	16	2	WT
44	16	1	WT
45	16	2	WT
46	16	4	WT
47	16	6	WT
48	16	4	WT
49	16	4	WT
50	16	4	WT
51	16	3	WT
52	16	5	WT
53	16	6	WT
54	16	4	WT
55	16	6	WT
56	16	5	WT
57	16	2	WT
58	16	2	WT
59	16	3	WT
1	17	1	WT
2	17	1	WT
3	17	1	WT
4	17	1	WT
5	17	2	WT
6	17	2	WT
7	17	2	WT
8	17	2	WT
9	17	10	WT
10	17	3	WT
11	17	5	WT
12	17	4	WT
13	17	4	WT
14	17	5	WT
15	17	5	WT
16	17	5	WT
17	17	2	WT
18	17	5	WT
19	17	9	WT
20	17	9	WT
21	17	8	WT
22	17	7	WT
23	17	9	WT
24	17	9	WT
25	17	7	WT
26	17	4	WT
27	17	4	WT
28	17	2	WT
29	17	5	WT
30	17	1	WT
1	18	1	WT
2	18	1	WT
3	18	1	WT
4	18	1	WT
5	18	2	WT
6	18	2	WT
7	18	2	WT
8	18	2	WT
9	18	3	WT
10	18	3	WT
11	18	4	WT
12	18	5	WT
13	18	3	WT
14	18	5	WT
15	18	4	WT
16	18	4	WT
17	18	4	WT
18	18	5	WT
19	18	3	WT
20	18	3	WT
21	18	1	WT
22	18	2	WT
23	18	2	WT
24	18	3	WT
25	18	3	WT
26	18	7	WT
1	19	1	WT
2	19	1	WT
3	19	1	WT
4	19	1	WT
5	19	1	WT
6	19	1	WT
7	19	1	WT
8	19	1	WT
9	19	1	WT
10	19	1	WT
11	19	1	WT
12	19	1	WT
13	19	1	WT
14	19	1	WT
15	19	1	WT
16	19	1	WT
17	19	1	WT
18	19	2	WT
19	19	2	WT
20	19	2	WT
21	19	2	WT
22	19	2	WT
23	19	2	WT
24	19	4	WT
25	19	3	WT
26	19	5	WT
27	19	2	WT
28	19	2	WT
29	19	4	WT
30	19	4	WT
31	19	6	WT
32	19	5	WT
33	19	8	WT
34	19	6	WT
35	19	6	WT
36	19	4	WT
37	19	4	WT
38	19	3	WT
39	19	3	WT
40	19	3	WT
41	19	2	WT
42	19	4	WT
1	20	1	WT
2	20	1	WT
3	20	1	WT
4	20	1	WT
5	20	1	WT
6	20	1	WT
7	20	1	WT
8	20	1	WT
9	20	1	WT
10	20	1	WT
11	20	6	WT
12	20	3	WT
13	20	5	WT
14	20	3	WT
15	20	3	WT
16	20	3	WT
17	20	5	WT
18	20	5	WT
19	20	6	WT
20	20	6	WT
21	20	6	WT
22	20	7	WT
23	20	11	WT
24	20	12	WT
25	20	10	WT
26	20	6	WT
27	20	10	WT
28	20	5	WT
29	20	7	WT
30	20	3	WT
31	20	4	WT
32	20	2	WT
33	20	3	WT
34	20	1	WT
35	20	1	WT
36	20	1	WT
1	21	1	WT
2	21	1	WT
3	21	1	WT
4	21	1	WT
5	21	1	WT
6	21	3	WT
7	21	3	WT
8	21	2	WT
9	21	2	WT
10	21	2	WT
11	21	3	WT
12	21	5	WT
13	21	6	WT
14	21	4	WT
15	21	4	WT
16	21	4	WT
17	21	4	WT
18	21	3	WT
19	21	2	WT
20	21	2	WT
21	21	1	WT
22	21	1	WT
23	21	1	WT
24	21	1	WT
25	21	1	WT
26	21	2	WT
27	21	4	WT
28	21	1	WT
1	22	1	WT
2	22	1	WT
3	22	1	WT
4	22	1	WT
5	22	1	WT
6	22	1	WT
7	22	1	WT
8	22	3	WT
9	22	5	WT
10	22	4	WT
11	22	2	WT
12	22	3	WT
13	22	6	WT
14	22	4	WT
15	22	3	WT
16	22	3	WT
17	22	3	WT
18	22	3	WT
19	22	3	WT
20	22	5	WT
21	22	4	WT
22	22	3	WT
23	22	2	WT
1	23	1	WT
2	23	1	WT
3	23	1	WT
4	23	1	WT
5	23	1	WT
6	23	1	WT
7	23	1	WT
8	23	1	WT
9	23	1	WT
10	23	3	WT
11	23	1	WT
12	23	1	WT
13	23	1	WT
14	23	1	WT
15	23	1	WT
16	23	1	WT
17	23	1	WT
18	23	1	WT
19	23	1	WT
20	23	1	WT
21	23	1	WT
22	23	1	WT
23	23	1	WT
24	23	1	WT
25	23	2	WT
26	23	2	WT
27	23	2	WT
28	23	3	WT
29	23	10	WT
30	23	3	WT
31	23	15	WT
32	23	4	WT
33	23	9	WT
34	23	8	WT
35	23	9	WT
36	23	5	WT
37	23	7	WT
38	23	6	WT
39	23	3	WT
1	24	1	WT
2	24	1	WT
3	24	1	WT
4	24	1	WT
5	24	1	WT
6	24	1	WT
7	24	1	WT
8	24	1	WT
9	24	1	WT
10	24	1	WT
11	24	1	WT
12	24	1	WT
13	24	1	WT
14	24	7	WT
15	24	1	WT
16	24	1	WT
17	24	1	WT
18	24	1	WT
19	24	1	WT
20	24	1	WT
21	24	1	WT
22	24	1	WT
23	24	5	WT
24	24	3	WT
25	24	1	WT
26	24	1	WT
27	24	2	WT
28	24	6	WT
29	24	3	WT
30	24	7	WT
31	24	11	WT
32	24	8	WT
33	24	6	WT
34	24	8	WT
35	24	4	WT
36	24	5	WT
37	24	4	WT
38	24	7	WT
39	24	3	WT
40	24	6	WT
41	24	1	WT
42	24	1	WT
43	24	1	WT
1	25	1	WT
2	25	1	WT
3	25	1	WT
4	25	1	WT
5	25	1	WT
6	25	1	WT
7	25	1	WT
8	25	1	WT
9	25	1	WT
10	25	1	WT
11	25	1	WT
12	25	1	WT
13	25	8	WT
14	25	2	WT
15	25	2	WT
16	25	2	WT
17	25	2	WT
18	25	1	WT
19	25	1	WT
20	25	1	WT
21	25	2	WT
22	25	2	WT
23	25	2	WT
24	25	7	WT
25	25	4	WT
26	25	4	WT
27	25	3	WT
28	25	3	WT
29	25	2	WT
30	25	1	WT
31	25	1	WT
32	25	3	WT
1	26	1	WT
2	26	1	WT
3	26	1	WT
4	26	1	WT
5	26	1	WT
6	26	1	WT
7	26	1	WT
8	26	1	WT
9	26	1	WT
10	26	1	WT
11	26	1	WT
12	26	1	WT
13	26	1	WT
14	26	1	WT
15	26	1	WT
16	26	1	WT
17	26	1	WT
18	26	1	WT
19	26	5	WT
20	26	6	WT
21	26	7	WT
22	26	9	WT
23	26	6	WT
24	26	5	WT
25	26	7	WT
26	26	5	WT
27	26	7	WT
28	26	5	WT
29	26	8	WT
30	26	4	WT
31	26	3	WT
32	26	3	WT
33	26	2	WT
34	26	3	WT
35	26	3	WT
1	27	1	WT
2	27	1	WT
3	27	1	WT
4	27	1	WT
5	27	1	WT
6	27	1	WT
7	27	1	WT
8	27	1	WT
9	27	1	WT
10	27	1	WT
11	27	1	WT
12	27	1	WT
13	27	1	WT
14	27	1	WT
15	27	1	WT
16	27	1	WT
17	27	1	WT
18	27	1	WT
19	27	1	WT
20	27	1	WT
21	27	1	WT
22	27	1	WT
23	27	1	WT
24	27	1	WT
25	27	1	WT
26	27	1	WT
27	27	1	WT
28	27	1	WT
29	27	4	WT
30	27	4	WT
31	27	2	WT
32	27	4	WT
33	27	2	WT
34	27	6	WT
35	27	4	WT
36	27	6	WT
37	27	5	WT
38	27	6	WT
39	27	6	WT
40	27	3	WT
41	27	3	WT
42	27	3	WT
43	27	2	WT
44	27	1	WT
1	28	1	WT
2	28	1	WT
3	28	1	WT
4	28	1	WT
5	28	1	WT
6	28	1	WT
7	28	1	WT
8	28	1	WT
9	28	7	WT
10	28	4	WT
11	28	3	WT
12	28	2	WT
13	28	2	WT
14	28	2	WT
15	28	2	WT
16	28	2	WT
17	28	5	WT
18	28	6	WT
19	28	2	WT
20	28	2	WT
21	28	1	WT
22	28	1	WT
23	28	1	WT
24	28	1	WT
25	28	1	WT
26	28	2	WT
27	28	2	WT
28	28	9	WT
29	28	10	WT
30	28	2	WT
31	28	2	WT
32	28	4	WT
33	28	3	WT
34	28	2	WT
35	28	3	WT
36	28	3	WT
37	28	8	WT
38	28	2	WT
39	28	4	WT
40	28	2	WT
41	28	1	WT
1	29	1	WT
2	29	1	WT
3	29	1	WT
4	29	1	WT
5	29	1	WT
6	29	1	WT
7	29	1	WT
8	29	1	WT
9	29	1	WT
10	29	3	WT
11	29	1	WT
12	29	1	WT
13	29	1	WT
14	29	1	WT
15	29	1	WT
16	29	1	WT
17	29	1	WT
18	29	2	WT
19	29	4	WT
20	29	5	WT
21	29	11	WT
22	29	4	WT
23	29	4	WT
24	29	4	WT
25	29	3	WT
26	29	4	WT
27	29	4	WT
28	29	2	WT
29	29	2	WT
30	29	1	WT
31	29	1	WT
1	30	1	WT
2	30	1	WT
3	30	1	WT
4	30	1	WT
5	30	3	WT
6	30	1	WT
7	30	1	WT
8	30	1	WT
9	30	1	WT
10	30	1	WT
11	30	1	WT
12	30	5	WT
13	30	3	WT
14	30	1	WT
15	30	1	WT
16	30	1	WT
17	30	1	WT
18	30	1	WT
19	30	1	WT
20	30	1	WT
21	30	1	WT
22	30	2	WT
23	30	8	WT
24	30	7	WT
25	30	4	WT
26	30	3	WT
27	30	5	WT
28	30	6	WT
29	30	4	WT
30	30	6	WT
31	30	8	WT
32	30	7	WT
33	30	5	WT
34	30	3	WT
35	30	4	WT
36	30	1	WT
1	31	1	WT
2	31	1	WT
3	31	1	WT
4	31	1	WT
5	31	1	WT
6	31	1	WT
7	31	1	WT
8	31	0	WT
9	31	0	WT
10	31	4	WT
11	31	3	WT
12	31	5	WT
13	31	7	WT
14	31	5	WT
15	31	7	WT
16	31	6	WT
17	31	9	WT
18	31	9	WT
19	31	3	WT
20	31	4	WT
21	31	2	WT
22	31	2	WT
23	31	2	WT
24	31	1	WT
25	31	1	WT
26	31	1	WT
27	31	1	WT
28	31	2	WT
29	31	2	WT
1	32	1	WT
2	32	1	WT
3	32	1	WT
4	32	1	WT
5	32	1	WT
6	32	1	WT
7	32	1	WT
8	32	1	WT
9	32	1	WT
10	32	1	WT
11	32	1	WT
12	32	1	WT
13	32	1	WT
14	32	1	WT
15	32	1	WT
16	32	1	WT
17	32	1	WT
18	32	1	WT
19	32	3	WT
20	32	1	WT
21	32	1	WT
22	32	1	WT
23	32	1	WT
24	32	1	WT
25	32	1	WT
26	32	1	WT
27	32	1	WT
28	32	1	WT
29	32	1	WT
30	32	1	WT
31	32	1	WT
32	32	3	WT
33	32	1	WT
34	32	2	WT
35	32	4	WT
36	32	1	WT
37	32	2	WT
38	32	2	WT
39	32	4	WT
40	32	3	WT
41	32	3	WT
42	32	3	WT
43	32	3	WT
44	32	3	WT
45	32	3	WT
1	33	1	WT
2	33	1	WT
3	33	1	WT
4	33	1	WT
5	33	1	WT
6	33	1	WT
7	33	1	WT
8	33	1	WT
9	33	1	WT
10	33	1	WT
11	33	1	WT
12	33	5	WT
13	33	1	WT
14	33	1	WT
15	33	1	WT
16	33	1	WT
17	33	1	WT
18	33	5	WT
19	33	4	WT
20	33	5	WT
21	33	8	WT
22	33	10	WT
23	33	6	WT
24	33	7	WT
25	33	7	WT
26	33	6	WT
27	33	7	WT
28	33	5	WT
29	33	5	WT
30	33	5	WT
31	33	4	WT
32	33	5	WT
33	33	2	WT
34	33	5	WT
35	33	3	WT
36	33	2	WT
1	34	1	WT
2	34	1	WT
3	34	1	WT
4	34	1	WT
5	34	1	WT
6	34	1	WT
7	34	3	WT
8	34	1	WT
9	34	1	WT
10	34	3	WT
11	34	1	WT
12	34	2	WT
13	34	3	WT
14	34	3	WT
15	34	3	WT
16	34	3	WT
17	34	2	WT
18	34	2	WT
19	34	4	WT
20	34	7	WT
21	34	4	WT
22	34	4	WT
23	34	4	WT
24	34	7	WT
25	34	4	WT
26	34	2	WT
27	34	4	WT
28	34	1	WT
29	34	1	WT
30	34	1	WT
1	35	1	WT
2	35	1	WT
3	35	1	WT
4	35	1	WT
5	35	1	WT
6	35	1	WT
7	35	1	WT
8	35	1	WT
9	35	1	WT
10	35	1	WT
11	35	1	WT
12	35	1	WT
13	35	1	WT
14	35	1	WT
15	35	1	WT
16	35	1	WT
17	35	1	WT
18	35	1	WT
19	35	1	WT
20	35	1	WT
21	35	1	WT
22	35	1	WT
23	35	1	WT
24	35	1	WT
25	35	1	WT
26	35	1	WT
27	35	1	WT
28	35	1	WT
29	35	1	WT
30	35	2	WT
31	35	2	WT
32	35	4	WT
33	35	6	WT
34	35	7	WT
35	35	3	WT
36	35	4	WT
37	35	2	WT
38	35	1	WT
39	35	1	WT
40	35	1	WT
41	35	1	WT
42	35	1	WT
43	35	1	WT
1	36	1	WT
2	36	1	WT
3	36	1	WT
4	36	1	WT
5	36	1	WT
6	36	1	WT
7	36	1	WT
8	36	1	WT
9	36	1	WT
10	36	1	WT
11	36	1	WT
12	36	1	WT
13	36	1	WT
14	36	1	WT
15	36	1	WT
16	36	1	WT
17	36	1	WT
18	36	1	WT
19	36	1	WT
20	36	1	WT
21	36	1	WT
22	36	1	WT
23	36	1	WT
24	36	1	WT
25	36	1	WT
26	36	1	WT
27	36	1	WT
28	36	1	WT
29	36	1	WT
30	36	1	WT
31	36	1	WT
32	36	1	WT
33	36	1	WT
34	36	3	WT
35	36	1	WT
36	36	1	WT
37	36	1	WT
38	36	1	WT
39	36	1	WT
40	36	1	WT
41	36	1	WT
42	36	1	WT
43	36	3	WT
44	36	3	WT
45	36	3	WT
46	36	3	WT
47	36	2	WT
48	36	2	WT
49	36	6	WT
50	36	1	WT
1	37	1	WT
2	37	1	WT
3	37	1	WT
4	37	1	WT
5	37	1	WT
6	37	1	WT
7	37	1	WT
8	37	1	WT
9	37	1	WT
10	37	1	WT
11	37	1	WT
12	37	1	WT
13	37	1	WT
14	37	1	WT
15	37	1	WT
16	37	1	WT
17	37	1	WT
18	37	1	WT
19	37	1	WT
20	37	1	WT
21	37	2	WT
22	37	2	WT
23	37	2	WT
24	37	2	WT
25	37	2	WT
26	37	2	WT
27	37	2	WT
28	37	2	WT
29	37	3	WT
30	37	3	WT
31	37	3	WT
32	37	4	WT
33	37	4	WT
34	37	4	WT
35	37	9	WT
36	37	10	WT
37	37	7	WT
38	37	8	WT
39	37	11	WT
40	37	8	WT
41	37	7	WT
42	37	4	WT
43	37	9	WT
44	37	1	WT
45	37	1	WT
46	37	1	WT
1	38	1	WT
2	38	1	WT
3	38	1	WT
4	38	1	WT
5	38	1	WT
6	38	3	WT
7	38	2	WT
8	38	3	WT
9	38	3	WT
10	38	3	WT
11	38	3	WT
12	38	4	WT
13	38	7	WT
14	38	6	WT
15	38	5	WT
16	38	2	WT
17	38	6	WT
18	38	4	WT
19	38	3	WT
20	38	5	WT
21	38	6	WT
22	38	7	WT
23	38	3	WT
24	38	1	WT
25	38	1	WT
26	38	1	WT
27	38	1	WT
1	39	2	WT
2	39	2	WT
3	39	1	WT
4	39	1	WT
5	39	1	WT
6	39	1	WT
7	39	1	WT
8	39	1	WT
9	39	1	WT
10	39	1	WT
11	39	3	WT
12	39	1	WT
13	39	3	WT
14	39	8	WT
15	39	6	WT
16	39	5	WT
17	39	6	WT
18	39	6	WT
19	39	7	WT
20	39	12	WT
21	39	11	WT
22	39	9	WT
23	39	10	WT
24	39	17	WT
25	39	7	WT
26	39	6	WT
27	39	12	WT
28	39	6	WT
29	39	2	WT
30	39	2	WT
31	39	2	WT
32	39	2	WT
33	39	3	WT
34	39	1	WT
35	39	1	WT
36	39	1	WT
37	39	1	WT
38	39	1	WT
39	39	1	WT
1	40	1	WT
2	40	1	WT
3	40	1	WT
4	40	1	WT
5	40	1	WT
6	40	1	WT
7	40	1	WT
8	40	1	WT
9	40	1	WT
10	40	1	WT
11	40	1	WT
12	40	1	WT
13	40	2	WT
14	40	2	WT
15	40	5	WT
16	40	4	WT
17	40	3	WT
18	40	3	WT
19	40	6	WT
20	40	6	WT
21	40	4	WT
22	40	3	WT
23	40	5	WT
24	40	6	WT
25	40	5	WT
26	40	4	WT
27	40	5	WT
28	40	9	WT
29	40	6	WT
30	40	5	WT
31	40	3	WT
32	40	5	WT
33	40	3	WT
34	40	4	WT
35	40	7	WT
36	40	1	WT
37	40	1	WT
1	41	1	WT
2	41	1	WT
3	41	1	WT
4	41	1	WT
5	41	1	WT
6	41	1	WT
7	41	1	WT
8	41	1	WT
9	41	1	WT
10	41	1	WT
11	41	3	WT
12	41	2	WT
13	41	4	WT
14	41	3	WT
15	41	5	WT
16	41	8	WT
17	41	9	WT
18	41	8	WT
19	41	6	WT
20	41	6	WT
21	41	4	WT
22	41	3	WT
23	41	8	WT
1	42	1	WT
2	42	1	WT
3	42	3	WT
4	42	1	WT
5	42	1	WT
6	42	1	WT
7	42	1	WT
8	42	1	WT
9	42	3	WT
10	42	1	WT
11	42	1	WT
12	42	1	WT
13	42	1	WT
14	42	1	WT
15	42	1	WT
16	42	1	WT
17	42	1	WT
18	42	1	WT
19	42	4	WT
20	42	4	WT
21	42	12	WT
22	42	13	WT
23	42	14	WT
24	42	3	WT
25	42	3	WT
26	42	4	WT
27	42	7	WT
28	42	5	WT
29	42	7	WT
30	42	6	WT
31	42	8	WT
32	42	8	WT
33	42	8	WT
34	42	3	WT
35	42	3	WT
36	42	3	WT
37	42	3	WT
38	42	2	WT
39	42	1	WT
40	42	1	WT
1	1	1	Mut
2	1	1	Mut
3	1	1	Mut
4	1	1	Mut
5	1	1	Mut
6	1	1	Mut
7	1	1	Mut
8	1	1	Mut
9	1	1	Mut
10	1	2	Mut
11	1	5	Mut
12	1	1	Mut
13	1	4	Mut
14	1	7	Mut
15	1	7	Mut
16	1	5	Mut
17	1	5	Mut
18	1	5	Mut
19	1	6	Mut
20	1	8	Mut
21	1	7	Mut
22	1	9	Mut
23	1	7	Mut
24	1	2	Mut
25	1	2	Mut
26	1	2	Mut
27	1	3	Mut
28	1	1	Mut
29	1	1	Mut
1	2	1	Mut
2	2	1	Mut
3	2	1	Mut
4	2	1	Mut
5	2	1	Mut
6	2	1	Mut
7	2	1	Mut
8	2	1	Mut
9	2	1	Mut
10	2	1	Mut
11	2	1	Mut
12	2	1	Mut
13	2	1	Mut
14	2	3	Mut
15	2	2	Mut
16	2	3	Mut
17	2	4	Mut
18	2	6	Mut
19	2	8	Mut
20	2	4	Mut
21	2	8	Mut
22	2	7	Mut
23	2	5	Mut
24	2	6	Mut
25	2	3	Mut
26	2	1	Mut
27	2	1	Mut
1	3	1	Mut
2	3	1	Mut
3	3	1	Mut
4	3	1	Mut
5	3	1	Mut
6	3	1	Mut
7	3	1	Mut
8	3	1	Mut
9	3	1	Mut
10	3	2	Mut
11	3	2	Mut
12	3	3	Mut
13	3	4	Mut
14	3	4	Mut
15	3	5	Mut
16	3	5	Mut
17	3	5	Mut
18	3	5	Mut
19	3	4	Mut
20	3	4	Mut
21	3	4	Mut
22	3	6	Mut
23	3	5	Mut
24	3	5	Mut
25	3	5	Mut
26	3	5	Mut
27	3	5	Mut
28	3	7	Mut
29	3	5	Mut
30	3	2	Mut
31	3	1	Mut
1	4	1	Mut
2	4	1	Mut
3	4	1	Mut
4	4	1	Mut
5	4	1	Mut
6	4	1	Mut
7	4	1	Mut
8	4	1	Mut
9	4	1	Mut
10	4	1	Mut
11	4	1	Mut
12	4	1	Mut
13	4	1	Mut
14	4	1	Mut
15	4	5	Mut
16	4	2	Mut
17	4	3	Mut
18	4	3	Mut
19	4	3	Mut
20	4	5	Mut
21	4	4	Mut
22	4	4	Mut
23	4	3	Mut
24	4	3	Mut
25	4	3	Mut
26	4	3	Mut
27	4	3	Mut
28	4	3	Mut
29	4	3	Mut
30	4	2	Mut
31	4	3	Mut
32	4	1	Mut
33	4	1	Mut
34	4	1	Mut
35	4	1	Mut
36	4	1	Mut
37	4	1	Mut
38	4	1	Mut
1	5	1	Mut
2	5	1	Mut
3	5	1	Mut
4	5	1	Mut
5	5	1	Mut
6	5	1	Mut
7	5	1	Mut
8	5	1	Mut
9	5	1	Mut
10	5	1	Mut
11	5	1	Mut
12	5	5	Mut
13	5	6	Mut
14	5	5	Mut
15	5	5	Mut
16	5	4	Mut
17	5	6	Mut
18	5	8	Mut
19	5	7	Mut
20	5	6	Mut
21	5	5	Mut
22	5	4	Mut
23	5	4	Mut
24	5	4	Mut
25	5	4	Mut
26	5	6	Mut
27	5	3	Mut
28	5	3	Mut
29	5	3	Mut
30	5	5	Mut
31	5	3	Mut
32	5	1	Mut
33	5	1	Mut
1	6	1	Mut
2	6	1	Mut
3	6	1	Mut
4	6	1	Mut
5	6	1	Mut
6	6	1	Mut
7	6	1	Mut
8	6	1	Mut
9	6	1	Mut
10	6	1	Mut
11	6	1	Mut
12	6	1	Mut
13	6	1	Mut
14	6	1	Mut
15	6	3	Mut
16	6	5	Mut
17	6	2	Mut
18	6	1	Mut
19	6	3	Mut
20	6	2	Mut
21	6	6	Mut
22	6	3	Mut
23	6	6	Mut
24	6	3	Mut
25	6	3	Mut
26	6	2	Mut
27	6	4	Mut
28	6	1	Mut
29	6	1	Mut
30	6	1	Mut
1	7	1	Mut
2	7	1	Mut
3	7	1	Mut
4	7	1	Mut
5	7	1	Mut
6	7	1	Mut
7	7	1	Mut
8	7	1	Mut
9	7	1	Mut
10	7	1	Mut
11	7	1	Mut
12	7	1	Mut
13	7	1	Mut
14	7	1	Mut
15	7	1	Mut
16	7	1	Mut
17	7	1	Mut
18	7	1	Mut
19	7	1	Mut
20	7	1	Mut
21	7	3	Mut
22	7	2	Mut
23	7	3	Mut
24	7	3	Mut
25	7	8	Mut
26	7	6	Mut
27	7	1	Mut
28	7	1	Mut
29	7	2	Mut
30	7	5	Mut
31	7	3	Mut
32	7	3	Mut
33	7	1	Mut
34	7	1	Mut
35	7	1	Mut
1	8	1	Mut
2	8	1	Mut
3	8	1	Mut
4	8	1	Mut
5	8	1	Mut
6	8	1	Mut
7	8	1	Mut
8	8	1	Mut
9	8	1	Mut
10	8	1	Mut
11	8	2	Mut
12	8	2	Mut
13	8	2	Mut
14	8	2	Mut
15	8	2	Mut
16	8	2	Mut
17	8	3	Mut
18	8	4	Mut
19	8	8	Mut
20	8	9	Mut
21	8	6	Mut
22	8	8	Mut
23	8	6	Mut
24	8	5	Mut
25	8	3	Mut
26	8	2	Mut
27	8	2	Mut
28	8	1	Mut
1	9	1	Mut
2	9	1	Mut
3	9	1	Mut
4	9	1	Mut
5	9	1	Mut
6	9	1	Mut
7	9	1	Mut
8	9	1	Mut
9	9	1	Mut
10	9	1	Mut
11	9	1	Mut
12	9	1	Mut
13	9	1	Mut
14	9	1	Mut
15	9	1	Mut
16	9	1	Mut
17	9	1	Mut
18	9	2	Mut
19	9	10	Mut
20	9	11	Mut
21	9	8	Mut
22	9	6	Mut
23	9	7	Mut
24	9	8	Mut
25	9	7	Mut
26	9	7	Mut
27	9	8	Mut
28	9	8	Mut
29	9	7	Mut
30	9	4	Mut
31	9	5	Mut
32	9	3	Mut
33	9	3	Mut
1	10	1	Mut
2	10	1	Mut
3	10	1	Mut
4	10	1	Mut
5	10	1	Mut
6	10	1	Mut
7	10	1	Mut
8	10	1	Mut
9	10	1	Mut
10	10	1	Mut
11	10	1	Mut
12	10	15	Mut
13	10	8	Mut
14	10	4	Mut
15	10	4	Mut
16	10	3	Mut
17	10	7	Mut
18	10	3	Mut
19	10	2	Mut
20	10	1	Mut
21	10	1	Mut
22	10	1	Mut
23	10	1	Mut
24	10	1	Mut
25	10	1	Mut
26	10	2	Mut
27	10	3	Mut
28	10	4	Mut
29	10	2	Mut
30	10	2	Mut
31	10	2	Mut
32	10	1	Mut
33	10	3	Mut
34	10	2	Mut
35	10	2	Mut
36	10	2	Mut
37	10	2	Mut
38	10	2	Mut
39	10	3	Mut
40	10	3	Mut
41	10	8	Mut
42	10	2	Mut
43	10	1	Mut
44	10	1	Mut
45	10	1	Mut
46	10	1	Mut
47	10	1	Mut
48	10	1	Mut
1	11	1	Mut
2	11	1	Mut
3	11	1	Mut
4	11	1	Mut
5	11	1	Mut
6	11	1	Mut
7	11	1	Mut
8	11	1	Mut
9	11	1	Mut
10	11	1	Mut
11	11	1	Mut
12	11	1	Mut
13	11	1	Mut
14	11	1	Mut
15	11	1	Mut
16	11	1	Mut
17	11	1	Mut
18	11	1	Mut
19	11	1	Mut
20	11	1	Mut
21	11	1	Mut
22	11	2	Mut
23	11	2	Mut
24	11	3	Mut
25	11	4	Mut
26	11	3	Mut
27	11	2	Mut
28	11	3	Mut
29	11	2	Mut
30	11	4	Mut
31	11	5	Mut
32	11	7	Mut
33	11	9	Mut
34	11	4	Mut
35	11	2	Mut
36	11	5	Mut
37	11	2	Mut
38	11	1	Mut
39	11	1	Mut
40	11	1	Mut
1	12	1	Mut
2	12	1	Mut
3	12	1	Mut
4	12	1	Mut
5	12	1	Mut
6	12	1	Mut
7	12	1	Mut
8	12	1	Mut
9	12	1	Mut
10	12	1	Mut
11	12	1	Mut
12	12	1	Mut
13	12	2	Mut
14	12	2	Mut
15	12	2	Mut
16	12	2	Mut
17	12	6	Mut
18	12	7	Mut
19	12	4	Mut
20	12	5	Mut
21	12	5	Mut
22	12	6	Mut
23	12	3	Mut
24	12	4	Mut
25	12	4	Mut
26	12	1	Mut
1	13	1	Mut
2	13	1	Mut
3	13	1	Mut
4	13	1	Mut
5	13	1	Mut
6	13	1	Mut
7	13	2	Mut
8	13	3	Mut
9	13	3	Mut
10	13	4	Mut
11	13	3	Mut
12	13	11	Mut
13	13	6	Mut
14	13	7	Mut
15	13	8	Mut
16	13	6	Mut
17	13	4	Mut
18	13	3	Mut
19	13	3	Mut
20	13	2	Mut
21	13	2	Mut
22	13	2	Mut
23	13	2	Mut
24	13	1	Mut
25	13	1	Mut
1	14	1	Mut
2	14	1	Mut
3	14	1	Mut
4	14	1	Mut
5	14	1	Mut
6	14	1	Mut
7	14	1	Mut
8	14	1	Mut
9	14	2	Mut
10	14	2	Mut
11	14	2	Mut
12	14	3	Mut
13	14	2	Mut
14	14	1	Mut
15	14	1	Mut
16	14	3	Mut
17	14	11	Mut
18	14	4	Mut
19	14	5	Mut
20	14	5	Mut
21	14	4	Mut
22	14	4	Mut
23	14	5	Mut
24	14	9	Mut
25	14	9	Mut
26	14	6	Mut
27	14	4	Mut
28	14	3	Mut
29	14	2	Mut
30	14	0	Mut
31	14	1	Mut
1	15	1	Mut
2	15	1	Mut
3	15	1	Mut
4	15	1	Mut
5	15	1	Mut
6	15	1	Mut
7	15	1	Mut
8	15	1	Mut
9	15	1	Mut
10	15	1	Mut
11	15	1	Mut
12	15	8	Mut
13	15	7	Mut
14	15	4	Mut
15	15	4	Mut
16	15	4	Mut
17	15	3	Mut
18	15	2	Mut
[truncated: 484 more rows]

## Sheet: Soma Diameter
Genotype	Neuron	Somadiameter
WT	WT_L1_LC_1	7.763
WT	WT_L1_LC_2	9.422
WT	WT_L1_LC_3	7.809
WT	WT_L1_RC1_1	8.267
WT	WT_L1_RC1_2	7.163
WT	WT_L1_RC1_3	6.735
WT	WT_L1_RC2_1	7.081
WT	WT_L2_RC_1	7.615
WT	WT_L2_RC_2	7.131
WT	WT_L2_RC_3	8.464
WT	WT_L2_RC_4	7.197
WT	WT_L4_RC_1	7.483
WT	WT_L5_LC_1	8.211
WT	WT_L5_RC_1	7.261
WT	WT_L5_RC_2	7.551
WT	WT_L11_RC_1	7.632
WT	WT_L11_RC_2	9.366
WT	WT_L11_LC_1	6.3
WT	WT_L11_LC_2	8.006
WT	WT_L11_LC_3	7.866
WT	WT_L11_LC_4	10.493
WT	WT_L11_LC_5	9.056
WT	WT_L11_LC_6	7.351
WT	WT_L11_LC_7	7.007
WT	WT_C_LC_1	6.836
WT	WT_C_LC_2	7.313
WT	WT_C_LC_3	8.34
WT	WT_C_LC_4	7.673
WT	WT_G_1	8.256
WT	WT_G_2	8.638
WT	WT_G_3	6.888
WT	WT_I_RC_1	6.885
WT	WT_I_RC_2	7.393
WT	WT_I_RC_3	8.075
WT	WT_B1_RC_1	7.066
WT	WT_B1_RC_2	8.083
WT	WT_B1_RC_3	7.268
WT	WT_B1_RC_4	7.504
WT	WT_B1_RC_5	9.285
WT	WT_B1_LC_1	6.558
WT	WT_B2_1_1	8.158
WT	WT_B2_1_2	7.971
WT	WT_B2_1_3	8.531
WT	WT_B2_2_1	8.476
WT	WT_B2_2_2	5.754
WT	WT_B2_2_3	6.819
WT	WT_B2_2_4	7.853
WT	WT_B5_LC_1	6.476
WT	WT_B5_LC_2	6.237
WT	WT_B5_LC_3	6.948
WT	WT_B7_LC_1	7.021
WT	WT_B7_LC_2	7.358
WT	WT_B7_LC_3	7.928
WT	WT_B7_LC_4	7.628
WT	WT_B_RC_1	7.069
WT	WT_B_RC_2	7.984
WT	WT_B_RC_3	8.029
WT	WT_B11_RC2_1	7.336
WT	WT_B11_RC2_2	6.242
WT	WT_B12_LC_1	8.845
Gjd2b-/-	MUT_L1_RC_1	6.838
Gjd2b-/-	MUT_L1_RC_2	5.508
Gjd2b-/-	MUT_L1_LC_1	8.159
Gjd2b-/-	MUT_L1_LC_2	7.067
Gjd2b-/-	MUT_L2_RC_1	6.91
Gjd2b-/-	MUT_L2_RC_2	7.364
Gjd2b-/-	MUT_L2_RC_3	7.422
Gjd2b-/-	MUT_L2_RC_4	8.215
Gjd2b-/-	MUT_L2_RC_5	7.43
Gjd2b-/-	MUT_L2_LC_1	7.067
Gjd2b-/-	MUT_L2_LC_2	6.863
Gjd2b-/-	MUT_L2_LC_3	6.541
Gjd2b-/-	MUT_L2_LC_4	8.347
Gjd2b-/-	MUT_L2_LC_2_1	7.238
Gjd2b-/-	MUT_L2_LC_2_2	6.817
Gjd2b-/-	MUT_L5_RC_1	7.895
Gjd2b-/-	MUT_L5_RC_2_1	7.186
Gjd2b-/-	MUT_L5_RC_2_2	5.951
Gjd2b-/-	MUT_L5_RC_2_3	6.393
Gjd2b-/-	MUT_L5_RC_2_4	6.466
Gjd2b-/-	MUT_L5_LC_1	8.093
Gjd2b-/-	MUT_L5_LC_2_1	7.75
Gjd2b-/-	MUT_L6_RC_1	7.907
Gjd2b-/-	MUT_L6_RC_2	7.512
Gjd2b-/-	MUT_L6_LC_1	6.787
Gjd2b-/-	MUT_L6_LC_2	8.104
Gjd2b-/-	MUT_L6_LC_3	8.174
Gjd2b-/-	MUT_L7_RC_1	7.89
Gjd2b-/-	MUT_L7_RC_2	8.321
Gjd2b-/-	MUT_L7_RC_3	8.068
Gjd2b-/-	MUT_L7_LC_2_1	8.211
Gjd2b-/-	MUT_L7_LC_2_2	7.827
Gjd2b-/-	MUT_L7_LC_2_3	7.464
Gjd2b-/-	MUT_L7_LC_2_4	7.068
Gjd2b-/-	MUT_L8_LC_1	6.533
Gjd2b-/-	MUT_L11_RC_1	5.508
Gjd2b-/-	MUT_L11_RC_2	6.032
Gjd2b-/-	MUT_L11_RC_3	6.896
Gjd2b-/-	MUT_L11_RC_4	6.278
Gjd2b-/-	MUT_L11_RC2_1	6.908
Gjd2b-/-	MUT_L11_RC2_2	6.623
Gjd2b-/-	MUT_L11_RC2_3	7.586
Gjd2b-/-	MUT_L11_LC_1	5.33
Gjd2b-/-	MUT_L12_RC_1	6.9
Gjd2b-/-	MUT_L12_RC_2	7.006
Gjd2b-/-	MUT_L12_RC_3	7.928
Gjd2b-/-	MUT_L12_RC_4	6.9
Gjd2b-/-	MUT_L12_RC_5	10.126
Gjd2b-/-	MUT_L12_RC_6	6.701
Gjd2b-/-	MUT_L12_RC_7	6.416
Gjd2b-/-	MUT_L12_LC_1	7.866
Gjd2b-/-	MUT_L12_LC_2	7.993
Gjd2b-/-	MUT_L12_LC_2_1	6.834
Gjd2b-/-	MUT_L12_LC_2_2	6.516
Gjd2b-/-	MUT_L12_LC_2_3	6.623
Gjd2b-/-	MUT_L13_LC_1	7.516
Gjd2b-/-	MUT_L14_RC_1	9.264
Gjd2b-/-	MUT_L14_RC_2	9.894
Gjd2b-/-	MUT_L14_LC_1	8.002
Gjd2b-/-	MUT_L14_LC_2	8.56

## Sheet: Hourly Imaging_Growth Rate
nblc	Genotype
0	wt
0.0193351	wt
0.0741767	wt
0.046122	wt
-0.0145897	wt
0.0393915	wt
-0.022288	wt
0.113693	wt
-0.0946098	wt
0.0540069	wt
0.0260804	wt
-0.054978	wt
0	wt
0.0554808	wt
-0.00219205	wt
0.0969601	wt
-0.0730259	wt
0.0182893	wt
-0.0833506	wt
0.0328292	wt
-0.00509081	wt
0.0173434	wt
0	wt
-0.155741	wt
0.0700938	wt
0.1223	wt
0.0401127	wt
-0.00175395	wt
0.023602	wt
0.0128378	wt
0.00829196	wt
0.105491	wt
0.0187598	wt
0	wt
0.0676452	wt
-0.109813	wt
-0.0597596	wt
0.163251	wt
-0.110502	wt
-0.0273302	wt
0.0511719	wt
-0.00902075	wt
0.0592156	wt
-0.0205062	wt
0	wt
0.0500008	wt
0.132001	wt
0.0725299	wt
0.099365	wt
-0.0653499	wt
-0.0107028	wt
0.0807348	wt
0.0151399	wt
0.0139435	wt
0.0566671	wt
0	wt
0.0392812	wt
-0.0645878	wt
-0.0200154	wt
0.0805439	wt
-0.00821458	wt
-0.026087	wt
0.0896244	wt
0.0330487	wt
-0.0901048	wt
0.146611	wt
0	wt
0.115712	wt
-0.0208367	wt
0.0622052	wt
0.0405805	wt
0.0047531	wt
0.0246239	wt
0.0343766	wt
0.135675	wt
-0.0146687	wt
-0.0324601	wt
0	wt
0.108587	wt
0.0274863	wt
0.00986679	wt
0.0227253	wt
0.063104	wt
-0.0348159	wt
0.053767	wt
-0.162107	wt
0.0886725	wt
-0.00823612	wt
0	wt
0.077472	wt
-0.101155	wt
0.0587159	wt
-0.0195432	wt
0.0591057	wt
0.00972681	wt
0.00937403	wt
0.00218948	wt
0.00905495	wt
-0.0272506	wt
0	mutant
0.0460807	mutant
-0.0594004	mutant
0.0219905	mutant
0.0891475	mutant
-0.0622601	mutant
0.0754775	mutant
-0.0358064	mutant
0.042247	mutant
-0.0497294	mutant
-0.0198304	mutant
0	mutant
0.0854242	mutant
0.00727493	mutant
-0.0376857	mutant
0.0256556	mutant
0.00650584	mutant
-0.0185307	mutant
-0.0119697	mutant
0.00600611	mutant
-0.0359082	mutant
-0.0249019	mutant
0	mutant
-0.000130429	mutant
0.135708	mutant
0.263677	mutant
-0.00232942	mutant
-0.030881	mutant
-0.0113349	mutant
0.0394328	mutant
-0.0782972	mutant
0.0255435	mutant
0.0387112	mutant
0	mutant
-0.00772527	mutant
-0.0856245	mutant
0.0129307	mutant
-0.0495283	mutant
0.0472279	mutant
-0.0246465	mutant
-0.0190623	mutant
-0.0172833	mutant
0.038893	mutant
-0.047126	mutant
0	mutant
-0.0655441	mutant
-0.0697738	mutant
-0.0148189	mutant
-0.0396663	mutant
0.0265527	mutant
0.0119921	mutant
-0.108252	mutant
0.073989	mutant
0.000744438	mutant
-0.0299068	mutant
0	mutant
0.089139	mutant
0.109673	mutant
-0.123741	mutant
0.0356817	mutant
-0.0467353	mutant
0.0825427	mutant
-0.00871888	mutant
-0.106043	mutant
0.0830175	mutant
-0.0573071	mutant
0	mutant
-0.138374	mutant
-0.107718	mutant
0.0630438	mutant
0.0639681	mutant
-0.36792	mutant
-0.20729	mutant
0.0507319	mutant
-0.000820123	mutant
0.0156635	mutant
0	mutant
-0.0586898	mutant
0.0736076	mutant
-0.0590873	mutant
0.0602607	mutant
-0.0236796	mutant
0.00796545	mutant
0	mutant
0.0141668	mutant
-0.0546318	mutant
0.0180071	mutant
-0.0546595	mutant
0.0320641	mutant
-0.0126831	mutant
0.0127629	mutant
-0.0579211	mutant
0.0219935	mutant
-0.0444329	mutant
0	mutant
0.0318517	mutant
-0.00228371	mutant
0.0181659	mutant
-0.133276	mutant
0.0398365	mutant
0.0822702	mutant
-0.128591	mutant
0.0975274	mutant
-0.0859376	mutant
0.00583663	mutant
0	mutant
-0.0411288	mutant
-0.0806353	mutant
0.0254136	mutant
-0.0541759	mutant
0.0268558	mutant
-0.0348569	mutant
-0.0160312	mutant
-0.0320386	mutant
-0.0219794	mutant
-0.0103388	mutant

## Sheet: Hourly Imaging_Elongation
Elongation	Genotype
0.112551	wt
0.125734	wt
0.117376	wt
0.0614669	wt
0.0638233	wt
0.10845	wt
0.188751	wt
0.0932257	wt
0.0986567	wt
0.0686725	wt
0.0143513	wt
0.0905195	wt
0.075485	wt
0.111033	wt
0.0240117	wt
0.12519	wt
0.0412253	wt
0.115462	wt
0.0261985	wt
0.0689508	wt
0.0204724	wt
0.0370171	wt
0.0742188	wt
0.127878	wt
0.127386	wt
0.03442	wt
0.0785731	wt
0.0351173	wt
0.0589116	wt
0.137308	wt
0.0903929	wt
0.118279	wt
0.032822	wt
0.0137583	wt
0.172543	wt
0.0128034	wt
0.00660361	wt
0.0713344	wt
0.0433692	wt
0.0609248	wt
0.0240207	wt
0.0789306	wt
0.11085	wt
0.118988	wt
0.172376	wt
0.0442173	wt
0.0561727	wt
0.124017	wt
0.0878639	wt
0.0797798	wt
0.105257	wt
0.0392812	wt
0	wt
0.018025	wt
0.0805439	wt
0.0465168	wt
0.0197697	wt
0.0915285	wt
0.0670263	wt
0	wt
0.146611	wt
0.139938	wt
0.0508624	wt
0.0825641	wt
0.10694	wt
0.0885788	wt
0.108183	wt
0.0867175	wt
0.14572	wt
0.0426639	wt
0.0685353	wt
0.167174	wt
0.119848	wt
0.0674817	wt
0.0538451	wt
0.0930749	wt
0.0695203	wt
0.126871	wt
0.0536799	wt
0.096588	wt
0.0410341	wt
0.177796	wt
0.0318166	wt
0.0776536	wt
0.0637661	wt
0.0615122	wt
0.0332384	wt
0.0534886	wt
0.0597675	wt
0.0657646	wt
0.0469481	wt
0.0347821	wt
0.0927658	wt
0.0006974	wt
0.073568	wt
0.0253908	wt
0.0429348	wt
0.0683233	mut
0.032963	mut
0.0907703	mut
0.0948892	mut
0.0285682	mut
0.0812167	mut
0.0148195	mut
0.0620459	mut
0.0335158	mut
0.0540785	mut
0.136605	mut
0.081852	mut
0.0457907	mut
0.0826221	mut
0.100844	mut
0.0433584	mut
0.0456416	mut
0.0493319	mut
0.0299554	mut
0.0411486	mut
0.0921132	mut
0.135708	mut
0.304005	mut
0.107846	mut
0.0466688	mut
0.143182	mut
0.090854	mut
0.0625427	mut
0.0970662	mut
0.0953149	mut
0.0356053	mut
0.00594384	mut
0.025423	mut
0.0308836	mut
0.0519814	mut
0.030413	mut
0.0125797	mut
0.00902933	mut
0.0428681	mut
0	mut
0.119152	mut
0.08326	mut
0.0552725	mut
0.0631597	mut
0.0942796	mut
0.0973308	mut
0.00302486	mut
0.0979959	mut
0.0400936	mut
0.0104411	mut
0.200308	mut
0.190774	mut
0.0479456	mut
0.0957093	mut
0.064324	mut
0.117069	mut
0.0664594	mut
0.00173649	mut
0.110331	mut
0.0167549	mut
0.114576	mut
0.0714748	mut
0.121973	mut
0.132751	mut
0.0314323	mut
0.0133755	mut
0.0901661	mut
0.0403009	mut
0.0654365	mut
0.0347821	mut
0.0927658	mut
0.000697375	mut
0.073568	mut
0.0253908	mut
0.0429348	mut
0.1076	mut
0.0465276	mut
0.0601803	mut
0.0573687	mut
0.0862898	mut
0.0771763	mut
0.0314671	mut
0.0185469	mut
0.0460793	mut
0.010641	mut
0.0460959	mut
0.0212724	mut
0.118492	mut
0.000827064	mut
0.0584998	mut
0.0822702	mut
0.00205814	mut
0.111866	mut
0.0165761	mut
0.0355352	mut
0.00912544	mut
0.00326263	mut
0.0288533	mut
0.0124936	mut
0.0477369	mut
0.0104241	mut
0.0309251	mut
0	mut
0.0251441	mut
0.00792406	mut

## Sheet: Hourly Imaging_Retraction
Ret	Genotype
-0.0932156	wt
-0.0515575	wt
-0.0712541	wt
-0.0760566	wt
-0.0244318	wt
-0.0712393	wt
-0.075058	wt
-0.187835	wt
-0.0446498	wt
-0.042592	wt
-0.0693293	wt
-0.0350386	wt
-0.0776771	wt
-0.0140727	wt
-0.0970376	wt
-0.106901	wt
-0.124576	wt
-0.0826326	wt
-0.0312893	wt
-0.0516074	wt
-0.111734	wt
-0.192758	wt
-0.00412494	wt
-0.0055774	wt
-0.0872735	wt
-0.036174	wt
-0.0549711	wt
-0.0222795	wt
-0.0506196	wt
-0.0318173	wt
-0.0716331	wt
-0.050634	wt
-0.142635	wt
-0.0735179	wt
-0.00929287	wt
-0.123306	wt
-0.0339338	wt
-0.0201625	wt
-0.05239	wt
-0.00170929	wt
-0.0445269	wt
-0.0289298	wt
-0.0206662	wt
-0.0464583	wt
-0.0730114	wt
-0.109567	wt
-0.0668755	wt
-0.0432818	wt
-0.072724	wt
-0.0658364	wt
-0.0485903	wt
0	wt
-0.0645878	wt
-0.0380403	wt
0	wt
-0.0547314	wt
-0.0458568	wt
-0.00190412	wt
-0.0339776	wt
-0.0901048	wt
0	wt
-0.0242263	wt
-0.0716991	wt
-0.0203589	wt
-0.0663599	wt
-0.0838257	wt
-0.083559	wt
-0.0523409	wt
-0.0100452	wt
-0.0573326	wt
-0.100995	wt
-0.0585868	wt
-0.0923612	wt
-0.0576149	wt
-0.0311198	wt
-0.0299709	wt
-0.104336	wt
-0.0731041	wt
-0.215787	wt
-0.00791552	wt
-0.0492702	wt
-0.100324	wt
-0.132972	wt
-0.0189377	wt
-0.0833094	wt
-0.00240641	wt
-0.0235116	wt
-0.0441145	wt
-0.057578	wt
-0.0567096	wt
-0.0741987	wt
-0.0222426	mut
-0.0923634	mut
-0.0687798	mut
-0.00574174	mut
-0.0908283	mut
-0.00573919	mut
-0.050626	mut
-0.0197989	mut
-0.0832452	mut
-0.0739089	mut
-0.0511809	mut
-0.0745771	mut
-0.0834764	mut
-0.0569665	mut
-0.0943382	mut
-0.0618891	mut
-0.0576113	mut
-0.0433258	mut
-0.0658636	mut
-0.0660505	mut
-0.0922436	mut
0	mut
-0.0403285	mut
-0.110176	mut
-0.0775497	mut
-0.154517	mut
-0.0514212	mut
-0.14084	mut
-0.0715227	mut
-0.0566037	mut
-0.0433306	mut
-0.0915683	mut
-0.0124923	mut
-0.0804119	mut
-0.00475355	mut
-0.0550595	mut
-0.031642	mut
-0.0263126	mut
-0.00397517	mut
-0.047126	mut
-0.184696	mut
-0.153034	mut
-0.0700915	mut
-0.102826	mut
-0.0677269	mut
-0.0853387	mut
-0.111277	mut
-0.0240069	mut
-0.0393492	mut
-0.040348	mut
-0.111169	mut
-0.0811011	mut
-0.171686	mut
-0.0600276	mut
-0.111059	mut
-0.0345265	mut
-0.0751783	mut
-0.107779	mut
-0.0273134	mut
-0.074062	mut
-0.0515319	mut
-0.25295	mut
-0.179193	mut
-0.0589293	mut
-0.0687831	mut
-0.399353	mut
-0.220666	mut
-0.0394342	mut
-0.041121	mut
-0.049773	mut
-0.093472	mut
0	mut
-0.059785	mut
-0.013307	mut
-0.04907	mut
-0.034969	mut
-0.0934333	mut
-0.101159	mut
-0.0421732	mut
-0.112028	mut
-0.0542257	mut
-0.0898594	mut
-0.0187042	mut
-0.076468	mut
-0.0240857	mut
-0.055074	mut
-0.0142442	mut
-0.0235562	mut
-0.100326	mut
-0.134103	mut
-0.0186633	mut
0	mut
-0.130649	mut
-0.014339	mut
-0.102514	mut
-0.0296985	mut
-0.0502542	mut
-0.083898	mut
-0.00343969	mut
-0.0666695	mut
-0.0208811	mut
-0.0452811	mut
-0.0469564	mut
-0.0320386	mut
-0.0471235	mut
-0.0182628	mut
