# Supplementary material for: Gjd2b-mediated gap junctions promote glutamatergic synapse formation and dendritic elaboration in Purkinje neurons
Source: eLife. 2021 Aug 4;10:e68124. doi: 10.7554/eLife.68124 (PMC8382294; doi:10.7554/eLife.68124)
Supplement: Figure 7—source data 1. [file elife-68124-fig7-data1.xlsx]

## Sheet: Gjd2b rescue
Genotype	TDBL
MUT	154.341
MUT	143.599
MUT	116.376
MUT	177.823
MUT	181.852
MUT	111.189
MUT	155.604
MUT	109.515
MUT	160.469
MUT	142.823
MUT	156.715
MUT	202.233
MUT	214.082
MUT	140.471
MUT	106.939
MUT	113.642
MUT	147.498
MUT	193.042
MUT	83.3138
MUT	230.883
MUT	132.429
MUT	53.5149
MUT	63.1555
MUT	94.1281
MUT	88.9156
MUT	126.053
MUT	83.4609
MUT	166.457
MUT	150.01
MUT	127.19
MUT	194.05
MUT	113.4
MUT	163.71
MUT	125.91
MUT	109.34
MUT	99.76
MUT	121.68
MUT	116
MUT	118.88
MUT	92.85
MUT	149.24
MUT	121.14
MUT	153.23
MUT	105.17
MUT	202.92
MUT	157.21
WT	141.838
WT	192.061
WT	138.996
WT	137.793
WT	75.33
WT	163.655
WT	118.07
WT	169.549
WT	203.669
WT	163.766
WT	206.329
WT	249.257
WT	281.433
WT	110.192
WT	121.868
WT	193.498
WT	211.248
WT	229.479
WT	144.084
WT	180.515
WT	161.943
WT	158.744
WT	165.632
WT	196.113
WT	116.442
WT	149.803
WT	213.061
WT	146.653
WT	113.214
WT	151.11
WT	173.816
WT	140.912
WT	209.603
WT	151.696
WT	99.8148
WT	107.276
WT	166.367
WT	239.068
WT	143.059
WT	140.368
WT	300.962
WT	246.683
WT	81.8328
WT	163.459
RESCUE	180.819
RESCUE	157.807
RESCUE	265.901
RESCUE	291.138
RESCUE	267.235
RESCUE	197.791
RESCUE	262.818
RESCUE	84.4907
RESCUE	132.809
RESCUE	171.992
RESCUE	155.047
RESCUE	244.428
RESCUE	124.287
RESCUE	203.386
RESCUE	283.442
RESCUE	351.139
RESCUEPD	140.515
RESCUEPD	138.414
RESCUEPD	200.599
RESCUEPD	213.035
RESCUEPD	172.555
RESCUEPD	169.85
RESCUEPD	78.3635
RESCUEPD	97.398
RESCUEPD	131.169
RESCUEPD	205.29
RESCUEPD	170.487
RESCUEPD	182.616
RESCUEPD	214.593
RESCUEPD	93.577
RESCUEPD	161.14
RESCUEPD	171.167
RESCUEPD	165.369
RESCUEPD	156.33
RESCUEPD	140.98
RESCUEPD	145.52
RESCUEPD	95.7215
RESCUEPD	139.352
RESCUEPD	177.894

## Sheet: Gjd2bmCherry_Elongation
Puncta	Elongation
YES	9.3347
YES	8.57409
YES	7.73106
YES	7.56185
YES	7.49892
YES	7.20035
YES	4.42367
YES	4.05727
YES	4.0453
YES	3.92875
YES	3.73816
YES	3.52216
YES	3.27363
YES	3.14812
YES	3.01083
YES	2.80191
YES	2.78507
YES	2.59412
YES	2.55731
YES	2.5527
YES	2.32364
YES	2.29513
YES	2.27797
YES	2.23331
YES	2.22486
YES	2.18522
YES	2.18489
YES	2.16382
YES	2.08397
YES	2.04073
YES	1.99985
YES	1.94602
YES	1.9009
YES	1.83391
YES	1.82472
YES	1.81576
YES	1.76878
YES	1.73277
YES	1.73122
YES	1.71528
YES	1.68798
YES	1.67024
YES	1.65311
YES	1.63417
YES	1.60922
YES	1.58719
YES	1.57316
YES	1.50452
YES	1.47229
YES	1.43414
YES	1.32459
YES	1.27737
YES	1.27425
YES	1.20329
YES	1.14872
YES	1.14468
YES	1.13398
YES	1.13398
YES	1.06943
YES	1.05232
YES	1.03891
YES	1.02871
YES	0.992185
YES	0.99139
YES	0.950165
YES	0.914449
YES	0.902822
YES	0.901397
YES	0.894309
YES	0.867376
YES	0.840419
YES	0.83934
YES	0.829858
YES	0.81681
YES	0.78545
YES	0.772956
YES	0.760593
YES	0.744522
YES	0.729928
YES	0.709264
YES	0.706104
YES	0.695457
YES	0.650419
YES	0.620853
YES	0.603534
YES	0.595218
YES	0.589603
YES	0.570273
YES	0.56505
YES	0.528377
YES	0.52264
YES	0.483559
YES	0.466324
YES	0.456182
YES	0.455625
YES	0.444641
YES	0.425559
YES	0.421758
YES	0.399361
YES	0.398309
YES	0.391141
YES	0.387141
YES	0.37757
YES	0.374647
YES	0.372853
YES	0.356859
YES	0.346273
YES	0.246206
YES	0.217637
YES	0.192978
YES	0.191226
YES	0.180485
YES	0.135499
YES	0.117183
YES	0.0853034
YES	0.074941
YES	0.0538904
NO	4.83015
NO	2.97197
NO	2.73444
NO	2.67358
NO	2.26656
NO	2.00675
NO	1.76607
NO	1.73776
NO	1.71484
NO	1.69336
NO	1.50452
NO	1.48333
NO	1.40558
NO	1.4025
NO	1.39679
NO	1.2849
NO	1.22701
NO	1.17311
NO	1.17188
NO	1.16435
NO	0.968489
NO	0.933222
NO	0.90614
NO	0.867279
NO	0.813831
NO	0.803185
NO	0.791968
NO	0.791968
NO	0.78956
NO	0.772956
NO	0.708794
NO	0.70727
NO	0.634971
NO	0.607175
NO	0.581772
NO	0.578576
NO	0.510147
NO	0.464586
NO	0.458103
NO	0.442163
NO	0.430962
NO	0.396549
NO	0.376963
NO	0.243258
NO	0.228471
NO	0.218434
NO	0.161872
NO	0.150919
NO	0.118377
NO	0.0998093
NO	0.0686468
NO	0.0686468
NO	0.0656683

## Sheet: Gjd2bmCherry_Retraction
Puncta	Retraction
YES	-0.0118308
YES	-0.0136252
YES	-0.0236921
YES	-0.137294
YES	-0.173976
YES	-0.229254
YES	-0.23125
YES	-0.254426
YES	-0.259831
YES	-0.26538
YES	-0.274587
YES	-0.281362
YES	-0.308972
YES	-0.321941
YES	-0.335566
YES	-0.343207
YES	-0.343287
YES	-0.379855
YES	-0.457225
YES	-0.458103
YES	-0.495971
YES	-0.511126
YES	-0.549177
YES	-0.555185
YES	-0.565471
YES	-0.567015
YES	-0.569331
YES	-0.594266
YES	-0.606521
YES	-0.609075
YES	-0.609765
YES	-0.625716
YES	-0.638641
YES	-0.662913
YES	-0.717934
YES	-0.718597
YES	-0.728166
YES	-0.745132
YES	-0.754037
YES	-0.817034
YES	-0.837782
YES	-0.83934
YES	-0.842167
YES	-0.870037
YES	-0.886694
YES	-0.891379
YES	-0.928068
YES	-0.934283
YES	-0.941663
YES	-0.961162
YES	-0.967119
YES	-0.969058
YES	-0.974445
YES	-0.995157
YES	-1.02388
YES	-1.12473
YES	-1.22803
YES	-1.30864
YES	-1.37966
YES	-1.43441
YES	-1.49522
YES	-1.52127
YES	-1.71523
YES	-1.76079
YES	-1.78208
YES	-1.93906
YES	-1.94737
YES	-2.04787
YES	-2.12063
YES	-2.15869
YES	-2.32138
YES	-2.34797
YES	-2.3858
YES	-2.45207
YES	-2.5645
YES	-2.72525
YES	-2.73901
YES	-2.95351
YES	-2.96336
YES	-3.37529
YES	-4.49911
YES	-4.87758
NO	-0.0166414
NO	-0.0189192
NO	-0.0674627
NO	-0.0970813
NO	-0.108859
NO	-0.122584
NO	-0.139141
NO	-0.148843
NO	-0.165728
NO	-0.180537
NO	-0.19411
NO	-0.234375
NO	-0.246153
NO	-0.2992
NO	-0.312537
NO	-0.346213
NO	-0.365132
NO	-0.398309
NO	-0.404846
NO	-0.416707
NO	-0.473509
NO	-0.474986
NO	-0.500129
NO	-0.511077
NO	-0.556899
NO	-0.619559
NO	-0.634698
NO	-0.657008
NO	-0.661065
NO	-0.664097
NO	-0.678963
NO	-0.682156
NO	-0.714903
NO	-0.754037
NO	-0.761178
NO	-0.786581
NO	-0.832847
NO	-0.873676
NO	-0.924787
NO	-0.996939
NO	-1.06296
NO	-1.11922
NO	-1.1826
NO	-1.1855
NO	-1.20742
NO	-1.28192
NO	-1.37054
NO	-1.44549
NO	-1.47377
NO	-1.5758
NO	-1.61522
NO	-1.66371
NO	-1.78073
NO	-1.83647
NO	-1.87274
NO	-1.91938
NO	-1.92009
NO	-2.00468
NO	-2.00992
NO	-2.17591
NO	-2.23439
NO	-2.24089
NO	-2.29408
NO	-2.30472
NO	-2.37193
NO	-2.42083
NO	-2.50064
NO	-2.53148
NO	-2.53562
NO	-2.62823
NO	-2.65397
NO	-2.79537
NO	-2.8302
NO	-2.85814
NO	-2.91497
NO	-2.94218
NO	-3.12089
NO	-3.22272
NO	-3.58671
NO	-3.957
NO	-4.10349
NO	-4.34731
NO	-4.51462
NO	-4.61097
NO	-4.70945
NO	-4.72088
