# Supplementary material for: Gjd2b-mediated gap junctions promote glutamatergic synapse formation and dendritic elaboration in Purkinje neurons
Source: eLife. 2021 Aug 4;10:e68124. doi: 10.7554/eLife.68124 (PMC8382294; doi:10.7554/eLife.68124)
Supplement: Supplementary file 2. — When PNs were electroporated (animal nos. 1–8), no other dye-coupled neurons were detected. When non-PNs were electroporated (animal nos. 9–13), several other dye-coupled cells were seen, of which a couple were PNs. See also Figure 7—figure supplement 1. [file elife-68124-supp2.docx]

**Single cell electroporation into PNs or non-PNs to identify electrically-coupled neurons.** When PNs were electroporated (animal nos. 1 through 8), no other dye-coupled neurons were detected. When non-PNs were electroporated (animal nos. 9 through 13), several other dye-coupled cells were seen, of which a couple were PNs. See also Figure S4.

| Electroporated Cell | | | No. of Dye Coupled Neurons | Dye coupled PNs |
| --- | --- | --- | --- | --- |
| Animal No. | PN | Non-PNs |
| 1 | 1 | 0 | 0 | 0 |
| 2 | 1 | 0 | 0 | 0 |
| 3 | 1 | 0 | 0 | 0 |
| 4 | 1 | 0 | 0 | 0 |
| 5 | 1 | 0 | 0 | 0 |
| 6 | 1 | 0 | 0 | 0 |
| 7 | 2 | 0 | 0 | 0 |
| 8 | 2 | 0 | 0 | 0 |
| 9 | 0 | 1 | 7 | 2 |
| 10 | 0 | 1 | 7 | 2 |
| 11 | 0 | 1 | 13 | 2 |
| 12 | 0 | 1 | 7 | 2 |
| 13 | 0 | 1 | 5 | 2 |
| 14 | 1 | 0 | 0 | 0 |
| 15 | 1 | 0 | 0 | 0 |
| 16 | 1 | 0 | 0 | 0 |
| 17 | 0 | 1 | 15 | Not known |
| 18 | 0 | 1 | 16 | Not known |
| 19 | 0 | 1 | 6 | Not known |
