# Supplementary figures and images for: Gjd2b-mediated gap junctions promote glutamatergic synapse formation and dendritic elaboration in Purkinje neurons
Source: eLife journal article supplement (doi:10.7554/elife.68124), 2021-08-04

Figure 7- figure supplement 1

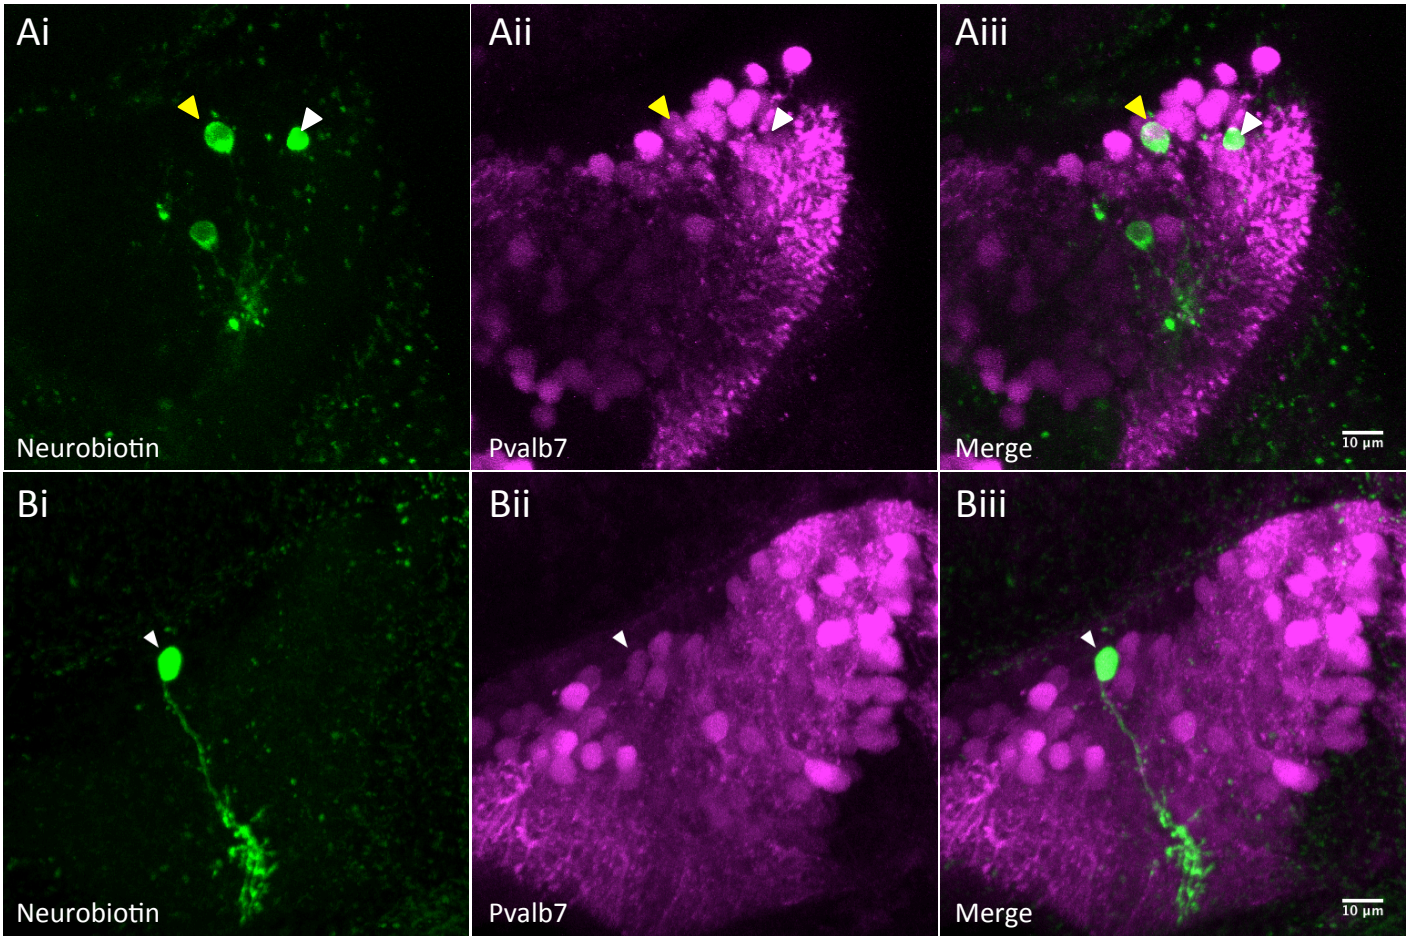

Supplement: supp [file elife-68124-supp-v1.zip]

Figure 1- figure supplement 2

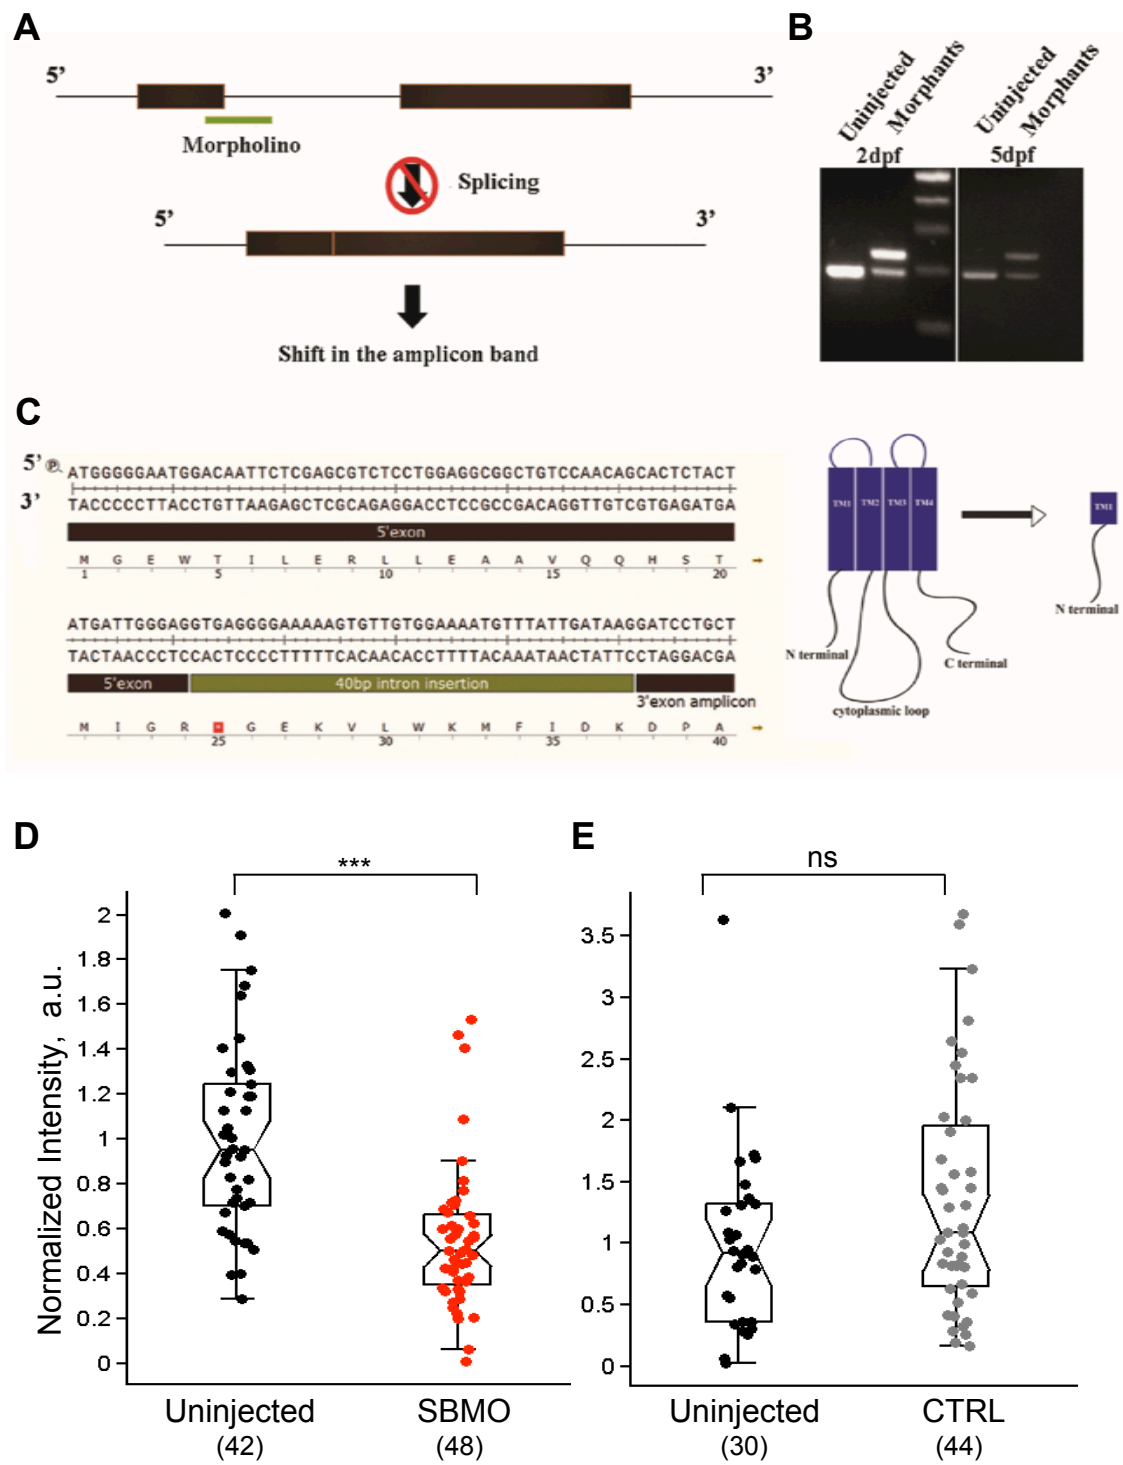

Supplement: supp [file elife-68124-supp-v1.zip]

Figure 3- figure supplement 1

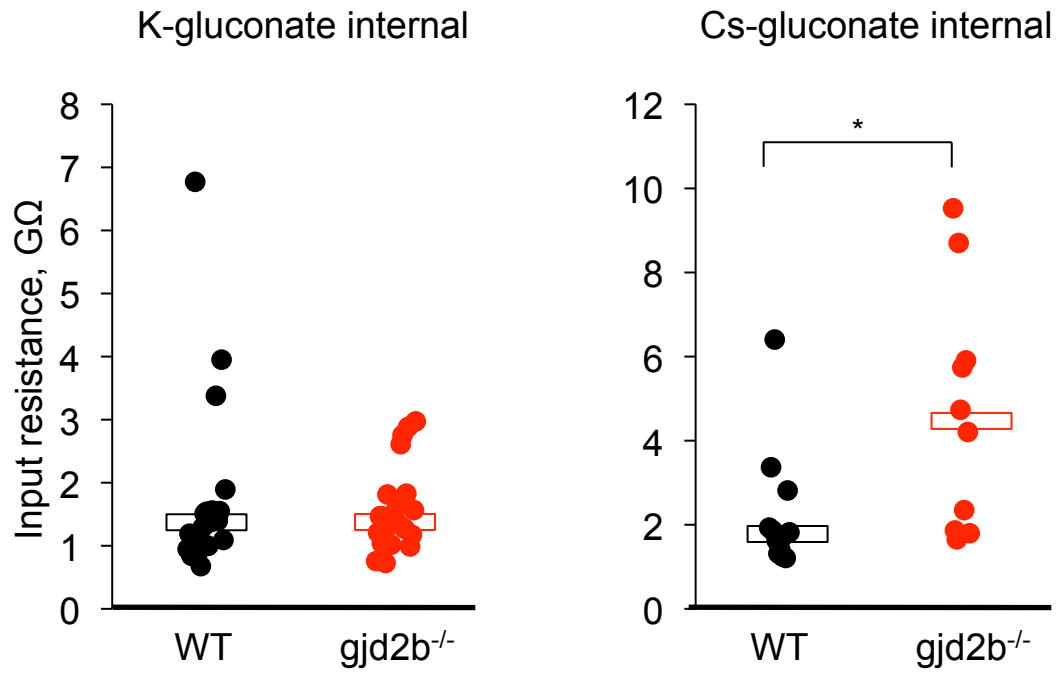

Supplement: supp [file elife-68124-supp-v1.zip]

Figure 1- figure supplement 1

**A**

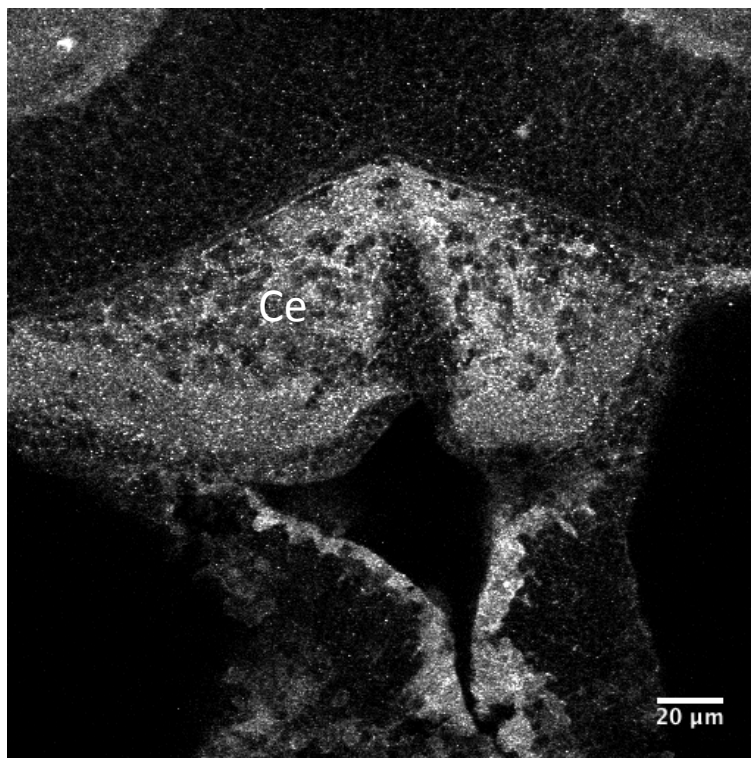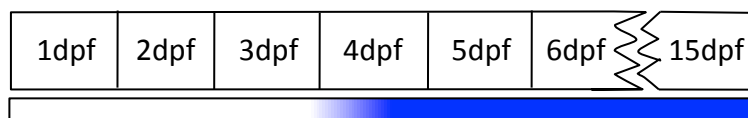

**B**

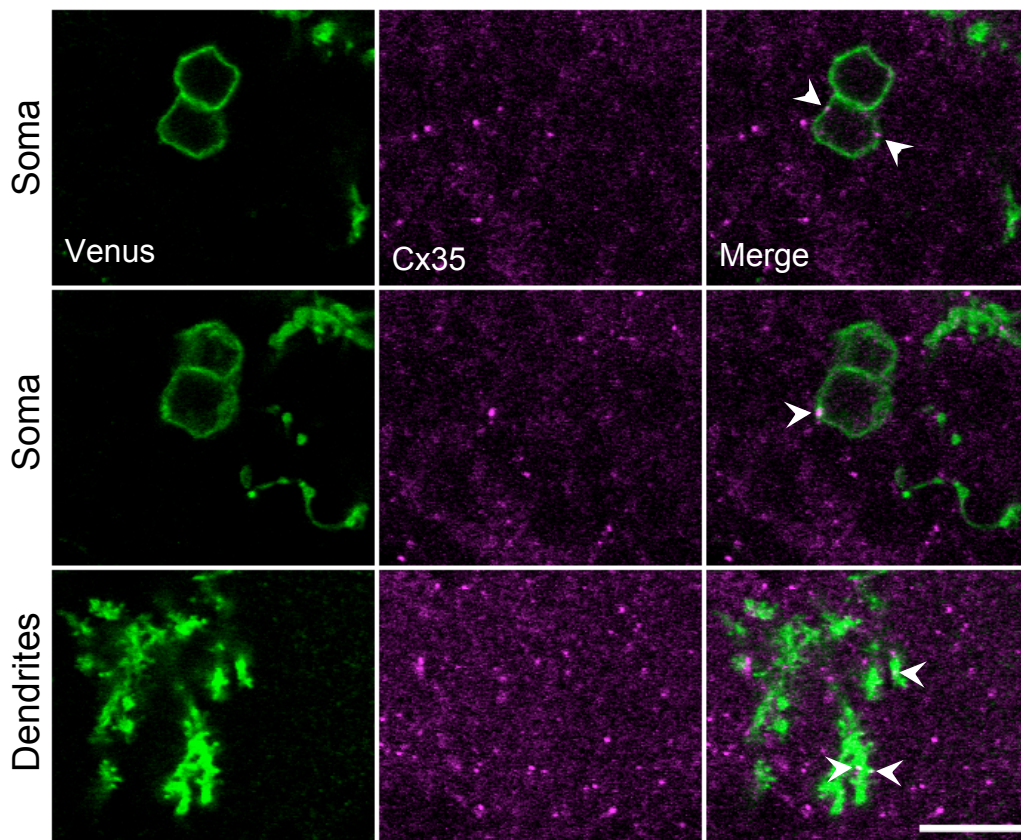

Supplement: supp [file elife-68124-supp-v1.zip]

Figure 6- figure supplement 1

**A**

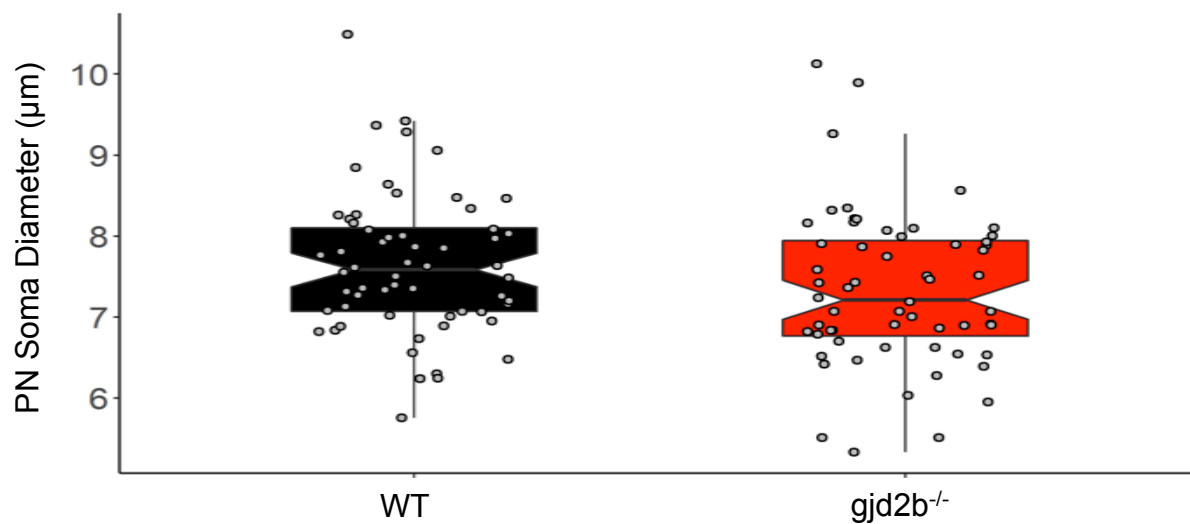

**B**

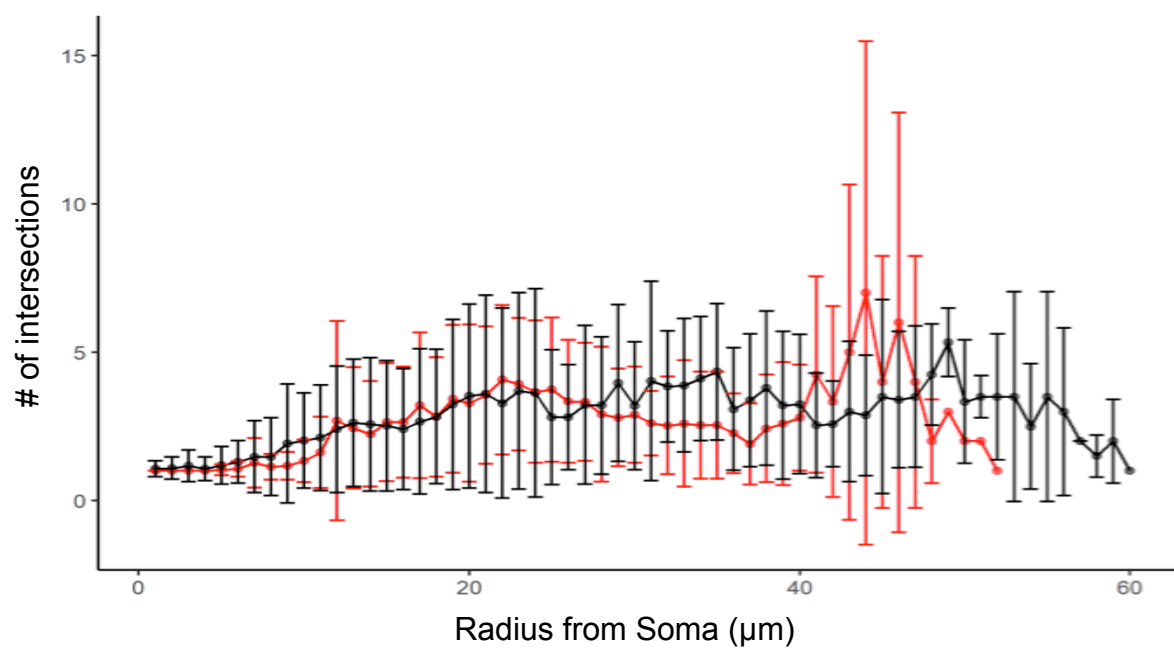

**C**

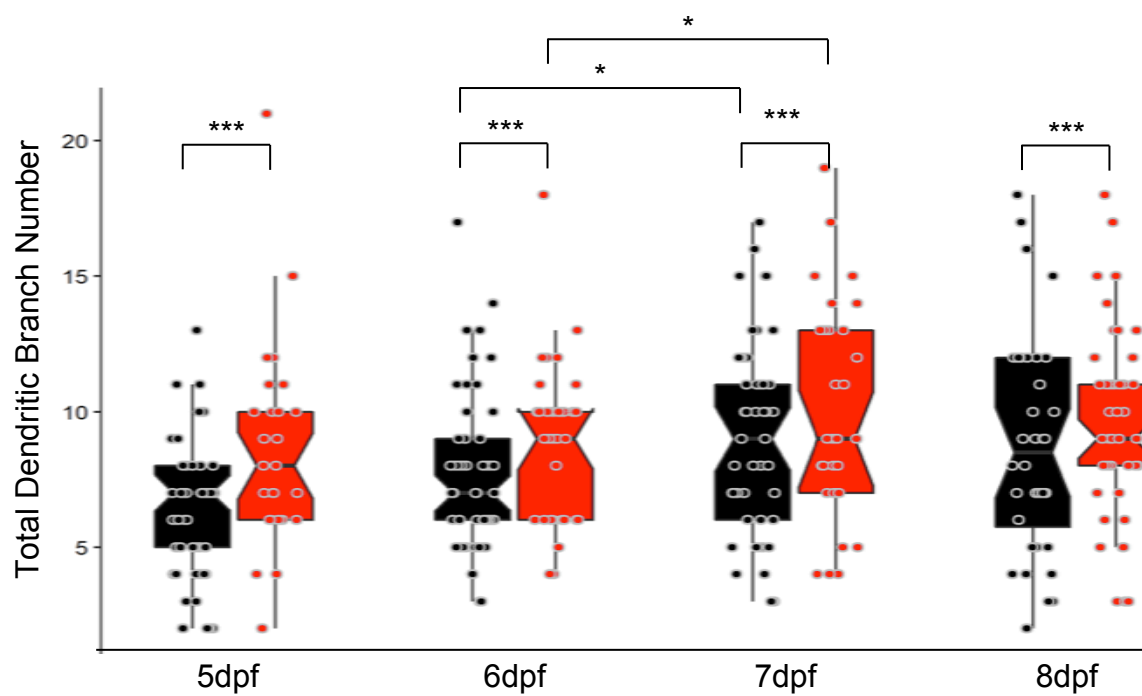

Supplement: supp [file elife-68124-supp-v1.zip]
